# Supplementary material for: Solution and Solid State Studies of Urea Derivatives of DITIPIRAM Acting as Powerful Anion Receptors
Source: MDPI journal article supplement (doi:10.3390/molecules26061788), 2021-03-22
Supplement: s1 [file s1]

## Supporting Information

### Solution and solid state studies of urea derivatives of DITIPIRAM acting as powerful anion receptors

Patryk Niedbała, Kajetan Dąbrowa, Agnieszka Cholewiak-Janusz, and Janusz Jurczak\*

Institute of Organic Chemistry, Polish Academy of Sciences, Kasprzaka 44/52, 01-224 Warsaw, Poland.

E-mail: jurczak\_group@icho.edu.pl

#### Contents

|                                                                                        |           |
|----------------------------------------------------------------------------------------|-----------|
| <b>1. CRYSTAL DATA</b>                                                                 | <b>2</b>  |
| <b>2. COMPUTATIONAL STUDIES</b>                                                        | <b>4</b>  |
| <b>3. COPIES OF <math>^1\text{H}</math> AND <math>^{13}\text{C}</math> NMR SPECTRA</b> | <b>5</b>  |
| <b>4. TITRATION EXPERIMENTS</b>                                                        | <b>9</b>  |
| <b>6. CARTESIAN COORDINATES OF CALCULATED STRUCTURES</b>                               | <b>32</b> |
| <b>7. REFERENCES</b>                                                                   | <b>47</b> |

## 1. Crystal Data

### Diffractometer and data collection

The X-ray measurements of **6**@(DMSO·H<sub>2</sub>O) and **6**@(Cl)TBA were performed at 100(2) K on a Bruker D8 Venture Photon100 diffractometer equipped with a TRIUMPH monochromator and a MoK $\alpha$  fine focus sealed tube ( $\lambda$  = 0.71073 Å) using Bruker APEX2 program [1]. Data were corrected for absorption effects using the multi-scan method (SADABS) [2]. The structure was solved and refined using SHELXTL Software Package [3].

All non-hydrogen atoms were refined anisotropically. Most of hydrogen atoms were placed in calculated positions and refined within the riding model. Position and temperature factors of four hydrogen atoms engaged in hydrogen bonds were refined. The temperature factors of all other hydrogen atoms were not refined and were set to be either 1.2 or 1.5 times larger than U<sub>eq</sub> of the corresponding heavy atom. The atomic scattering factors were taken from the International Tables [4]. Thermal ellipsoids parameters are presented at 50% probability level.

**Table S1.** Crystal data and structure refinement details for **6**@(DMSO·H<sub>2</sub>O) and **6**@(Cl)TBA.

| Compound                                     | <b>6</b> @(DMSO·H <sub>2</sub> O)                                                           | <b>6</b> @(Cl)TBA                                                                             |
|----------------------------------------------|---------------------------------------------------------------------------------------------|-----------------------------------------------------------------------------------------------|
| Empirical formula                            | C <sub>28</sub> H <sub>29</sub> F <sub>2</sub> N <sub>5</sub> O <sub>4</sub> S <sub>3</sub> | C <sub>42</sub> H <sub>57</sub> ClF <sub>2</sub> N <sub>6</sub> O <sub>2</sub> S <sub>2</sub> |
| Formula weight                               | 633.74                                                                                      | 815.50                                                                                        |
| CCDC No.                                     | 2063422                                                                                     | 2063423                                                                                       |
| Wavelength                                   | 1.54184                                                                                     | 1.54184                                                                                       |
| Crystal system                               | monoclinic                                                                                  | monoclinic                                                                                    |
| Space group                                  | P 2 <sub>1</sub> /n                                                                         | P 2 <sub>1</sub>                                                                              |
| Unit cell dimensions                         | a = 10.2142(5) Å<br>b = 22.3169(11) Å<br>c = 12.6528(6) Å<br>$\beta$ = 90.0136(12)°         | a = 8.4288(4) Å<br>b = 28.6479(13) Å<br>c = 17.9789(8) Å<br>$\beta$ = 99.7682(13)°            |
| Volume                                       | 2884.2 Å <sup>3</sup>                                                                       | 4278.4 Å <sup>3</sup>                                                                         |
| Z                                            | 4                                                                                           | 4                                                                                             |
| Density Calc.                                | 1.459 g/cm <sup>3</sup>                                                                     | 1.266 g/cm <sup>3</sup>                                                                       |
| F(000)                                       | 1320                                                                                        | 1736                                                                                          |
| Crystal size                                 | 0.104 × 0.273 × 0.559 mm                                                                    | 0.034 × 0.246 × 0.296 mm                                                                      |
| Index ranges                                 | -12 ≤ h ≤ 12<br>-26 ≤ k ≤ 26<br>-15 ≤ l ≤ 15                                                | -10 ≤ h ≤ 10<br>-34 ≤ k ≤ 34<br>-21 ≤ l ≤ 21                                                  |
| Reflections collected<br>(all / independent) | 38247/5095                                                                                  | 70952/15117                                                                                   |
| Absorption correction                        | multi-scan                                                                                  | multi-scan                                                                                    |
| Restraints / parameters                      | 5095/407                                                                                    | 15117/1098                                                                                    |
| Goodness-of-fit on $F^2$                     | 1.040                                                                                       | 1.028                                                                                         |

Thermal ellipsoid plots (ORTEP) for reported crystal structures with the thermal ellipsoids shown at a 50% probability level

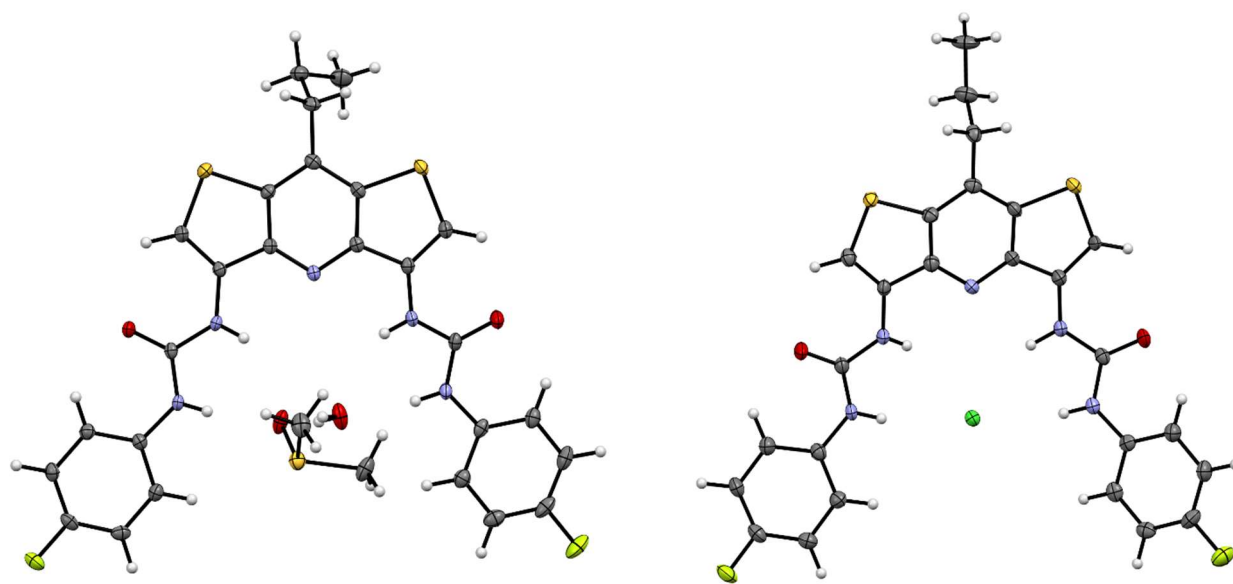

**Figure S1.** Thermal ellipsoid plot (ORTEP) diagram for structures **6**@(DMSO·H<sub>2</sub>O) (left) and **6**@(Cl)TBA (right).

## 2. Computational studies

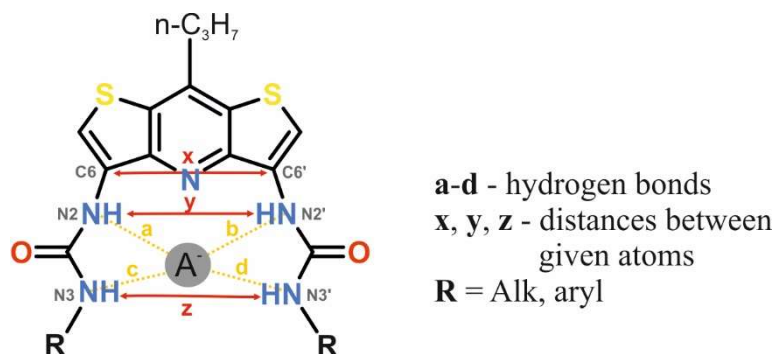

**Table S2.** Relevant geometrical descriptors, hydrogen bond lengths, and calculated Gibbs free energies of energy-optimized complexes of receptors **2-7** with anions<sup>[a]</sup>

| Structure                             | Descriptors (Å) |      |      | Hydrogen bond lengths (Å) |      |      |      | $\Delta(\Delta G^0)^{[b]}$ |
|---------------------------------------|-----------------|------|------|---------------------------|------|------|------|----------------------------|
|                                       | x               | y    | z    | a                         | b    | c    | d    |                            |
| <b>2@Cl<sup>-</sup></b>               | 4.88            | 4.96 | 6.81 | 3.45                      | 3.44 | 3.43 | 3.42 | -28.3                      |
| <b>3@Cl<sup>-</sup></b>               | 4.87            | 4.95 | 6.71 | 3.43                      | 3.44 | 3.36 | 3.37 | -31.4                      |
| <b>4@Cl<sup>-</sup></b>               | 4.87            | 4.94 | 6.67 | 3.42                      | 3.42 | 3.34 | 3.35 | <b>-39.3</b>               |
| <b>5@Cl<sup>-</sup></b>               | 4.87            | 4.94 | 6.68 | 3.43                      | 3.43 | 3.36 | 3.35 | -34.5                      |
| <b>6@Cl<sup>-</sup></b>               | 4.87            | 4.94 | 6.70 | 3.43                      | 3.43 | 3.36 | 3.36 | -31.4                      |
| <b>6@Cl<sup>-</sup>[a]</b>            | 4.82            | 4.87 | 6.54 | 3.39                      | 3.46 | 3.29 | 3.30 | -                          |
| <b>7@Cl<sup>-</sup></b>               | 4.87            | 4.94 | 6.68 | 3.46                      | 3.45 | 3.35 | 3.36 | -31.8                      |
| <b>2@MeCO<sub>2</sub><sup>-</sup></b> | 4.92            | 5.14 | 7.30 | 2.86                      | 2.86 | 2.85 | 2.87 | -52.1                      |
| <b>3@MeCO<sub>2</sub><sup>-</sup></b> | 4.96            | 5.32 | 7.65 | 2.83                      | 2.82 | 2.75 | 2.75 | -73.7                      |
| <b>4@MeCO<sub>2</sub><sup>-</sup></b> | 4.96            | 5.31 | 7.62 | 2.82                      | 2.81 | 2.73 | 2.73 | -72.4                      |
| <b>5@MeCO<sub>2</sub><sup>-</sup></b> | 4.92            | 5.16 | 7.27 | 2.86                      | 2.85 | 2.80 | 2.78 | <b>-75.6</b>               |
| <b>6@MeCO<sub>2</sub><sup>-</sup></b> | 4.96            | 5.31 | 7.64 | 2.83                      | 2.83 | 2.74 | 2.74 | -65.1                      |
| <b>7@MeCO<sub>2</sub><sup>-</sup></b> | 4.92            | 5.16 | 7.28 | 2.86                      | 2.85 | 2.80 | 2.82 | -70.9                      |
| <b>2@PhCO<sub>2</sub><sup>-</sup></b> | 4.91            | 5.10 | 7.19 | 2.92                      | 2.92 | 2.93 | 2.89 | -48.4                      |
| <b>3@PhCO<sub>2</sub><sup>-</sup></b> | 4.93            | 5.18 | 7.30 | 2.80                      | 2.85 | 2.80 | 2.82 | -60.2                      |
| <b>4@PhCO<sub>2</sub><sup>-</sup></b> | 4.93            | 5.17 | 7.26 | 2.87                      | 2.83 | 2.78 | 2.81 | <b>-65.3</b>               |
| <b>5@PhCO<sub>2</sub><sup>-</sup></b> | 4.93            | 5.18 | 7.29 | 2.88                      | 2.84 | 2.78 | 2.81 | -61.8                      |
| <b>6@PhCO<sub>2</sub><sup>-</sup></b> | 4.91            | 5.12 | 7.19 | 2.86                      | 2.90 | 2.83 | 2.83 | -60.6                      |
| <b>7@PhCO<sub>2</sub><sup>-</sup></b> | 4.92            | 5.14 | 7.25 | 2.87                      | 2.87 | 2.83 | 2.85 | -64.7                      |

[a] The structures were found using conformational search analysis; the final geometry optimization (without constraints) and energy calculations were calculated at DFT/M06-2X/6-31G(d)/C-PCM:DMSO level of theory using Spartan'18 Parallel Suite. [b] Free binding energy  $\Delta(\Delta G^0) = \Delta G^0_{\text{complex}} - (\Delta G^0_{\text{receptor}} + \Delta G^0_{\text{anion}})$  in kJ/mol.

### 3. Copies of $^1\text{H}$ and $^{13}\text{C}$ NMR spectra

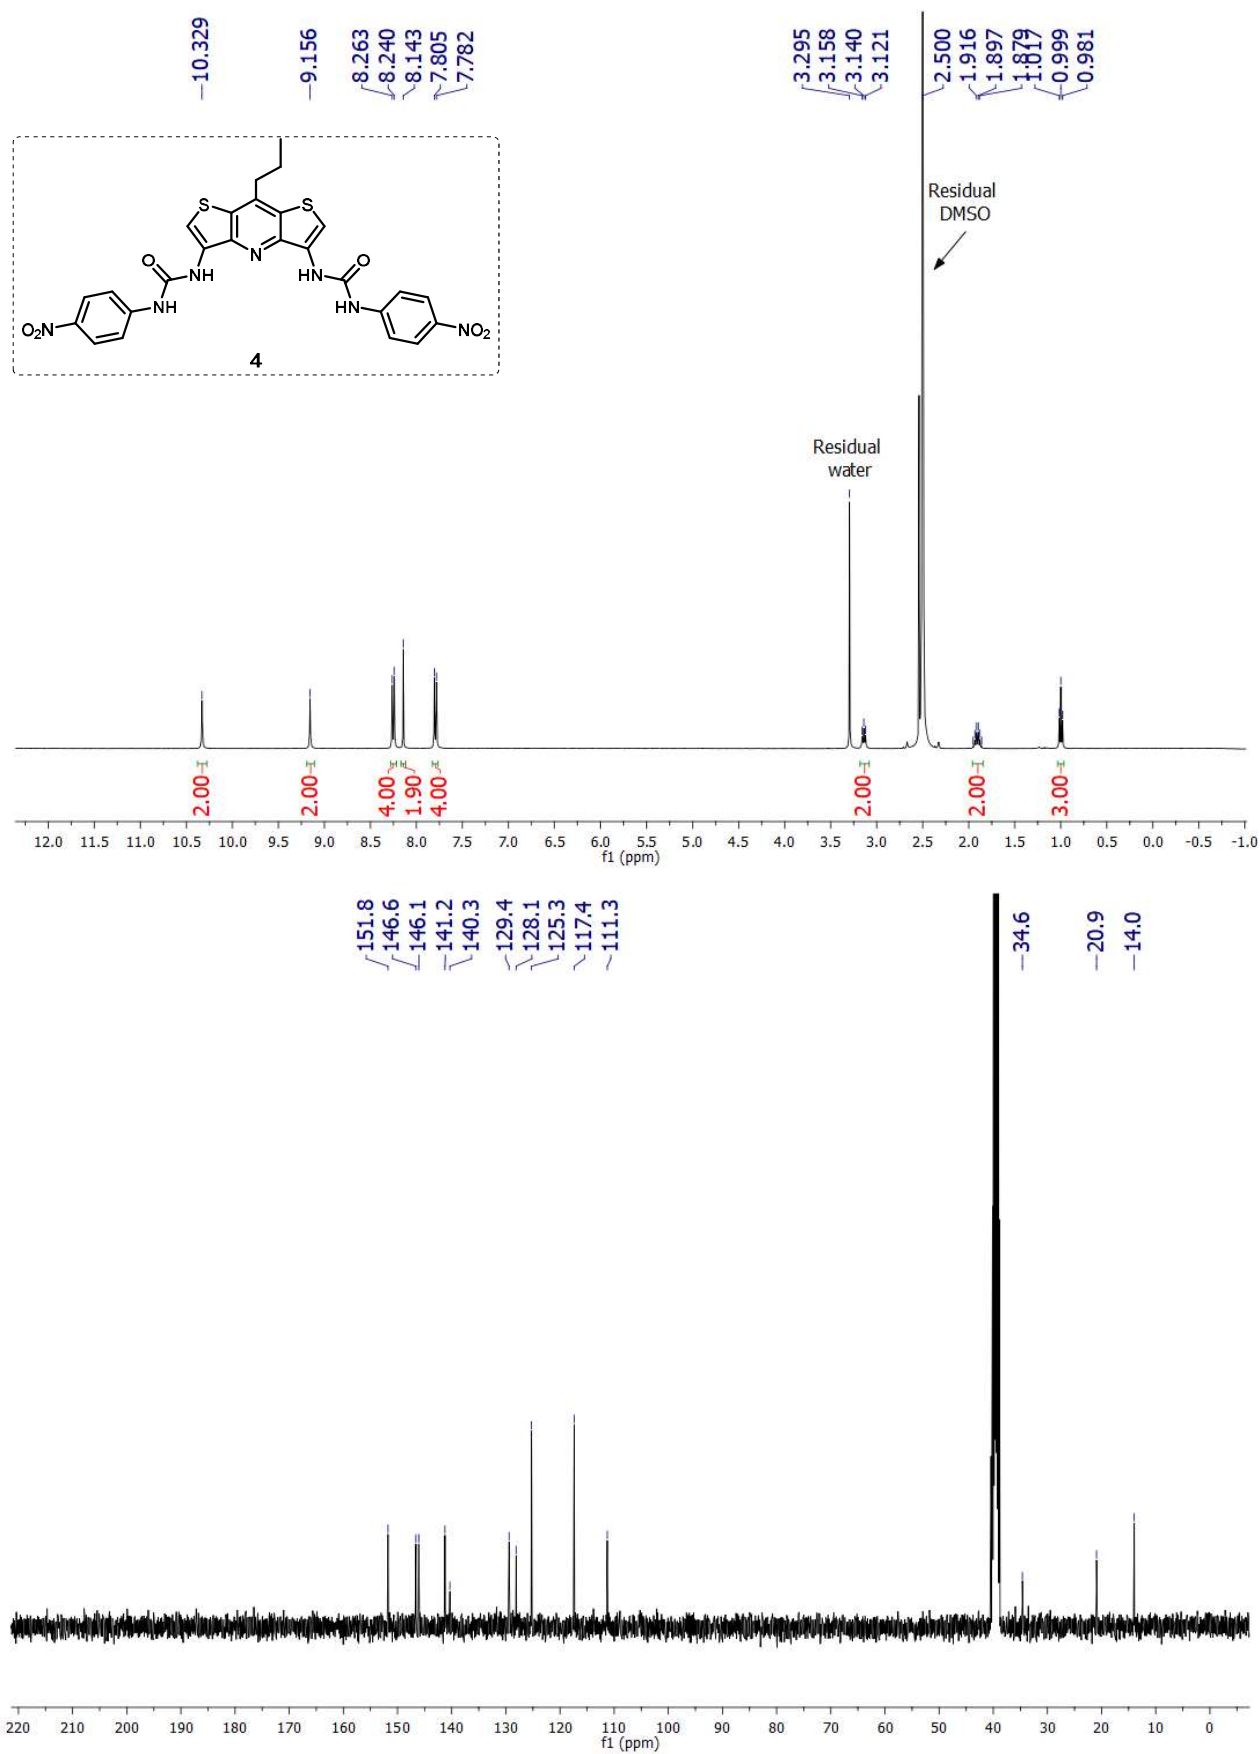

**Figure S2.**  $^1\text{H}$  NMR (400 MHz) and  $^{13}\text{C}$  NMR (100 MHz) spectra of compound **4** in  $\text{DMSO}-d_6$ .

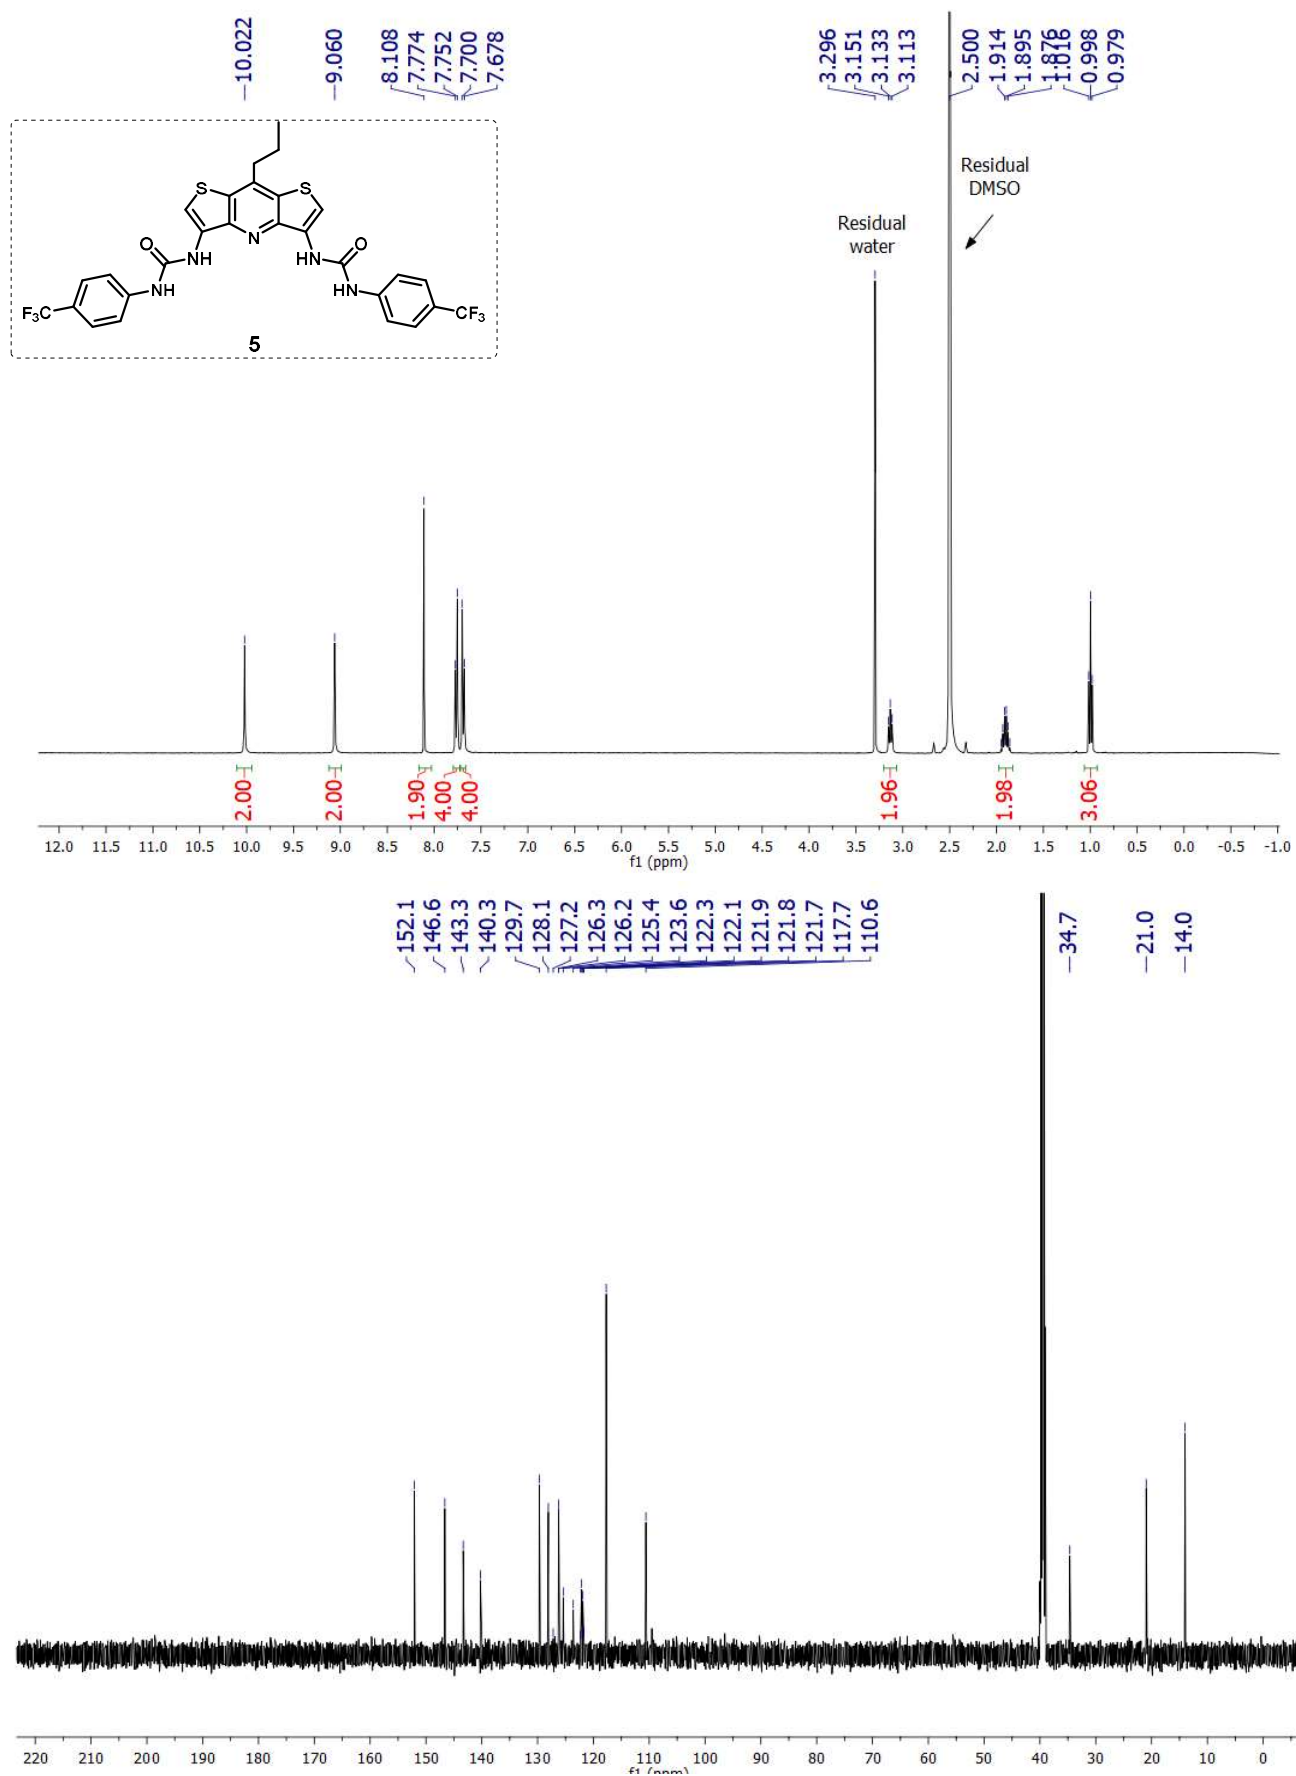

**Figure S3.** <sup>1</sup>H NMR (400 MHz) and <sup>13</sup>C NMR (100 MHz) spectra of compound **5** in DMSO-*d*<sub>6</sub>.

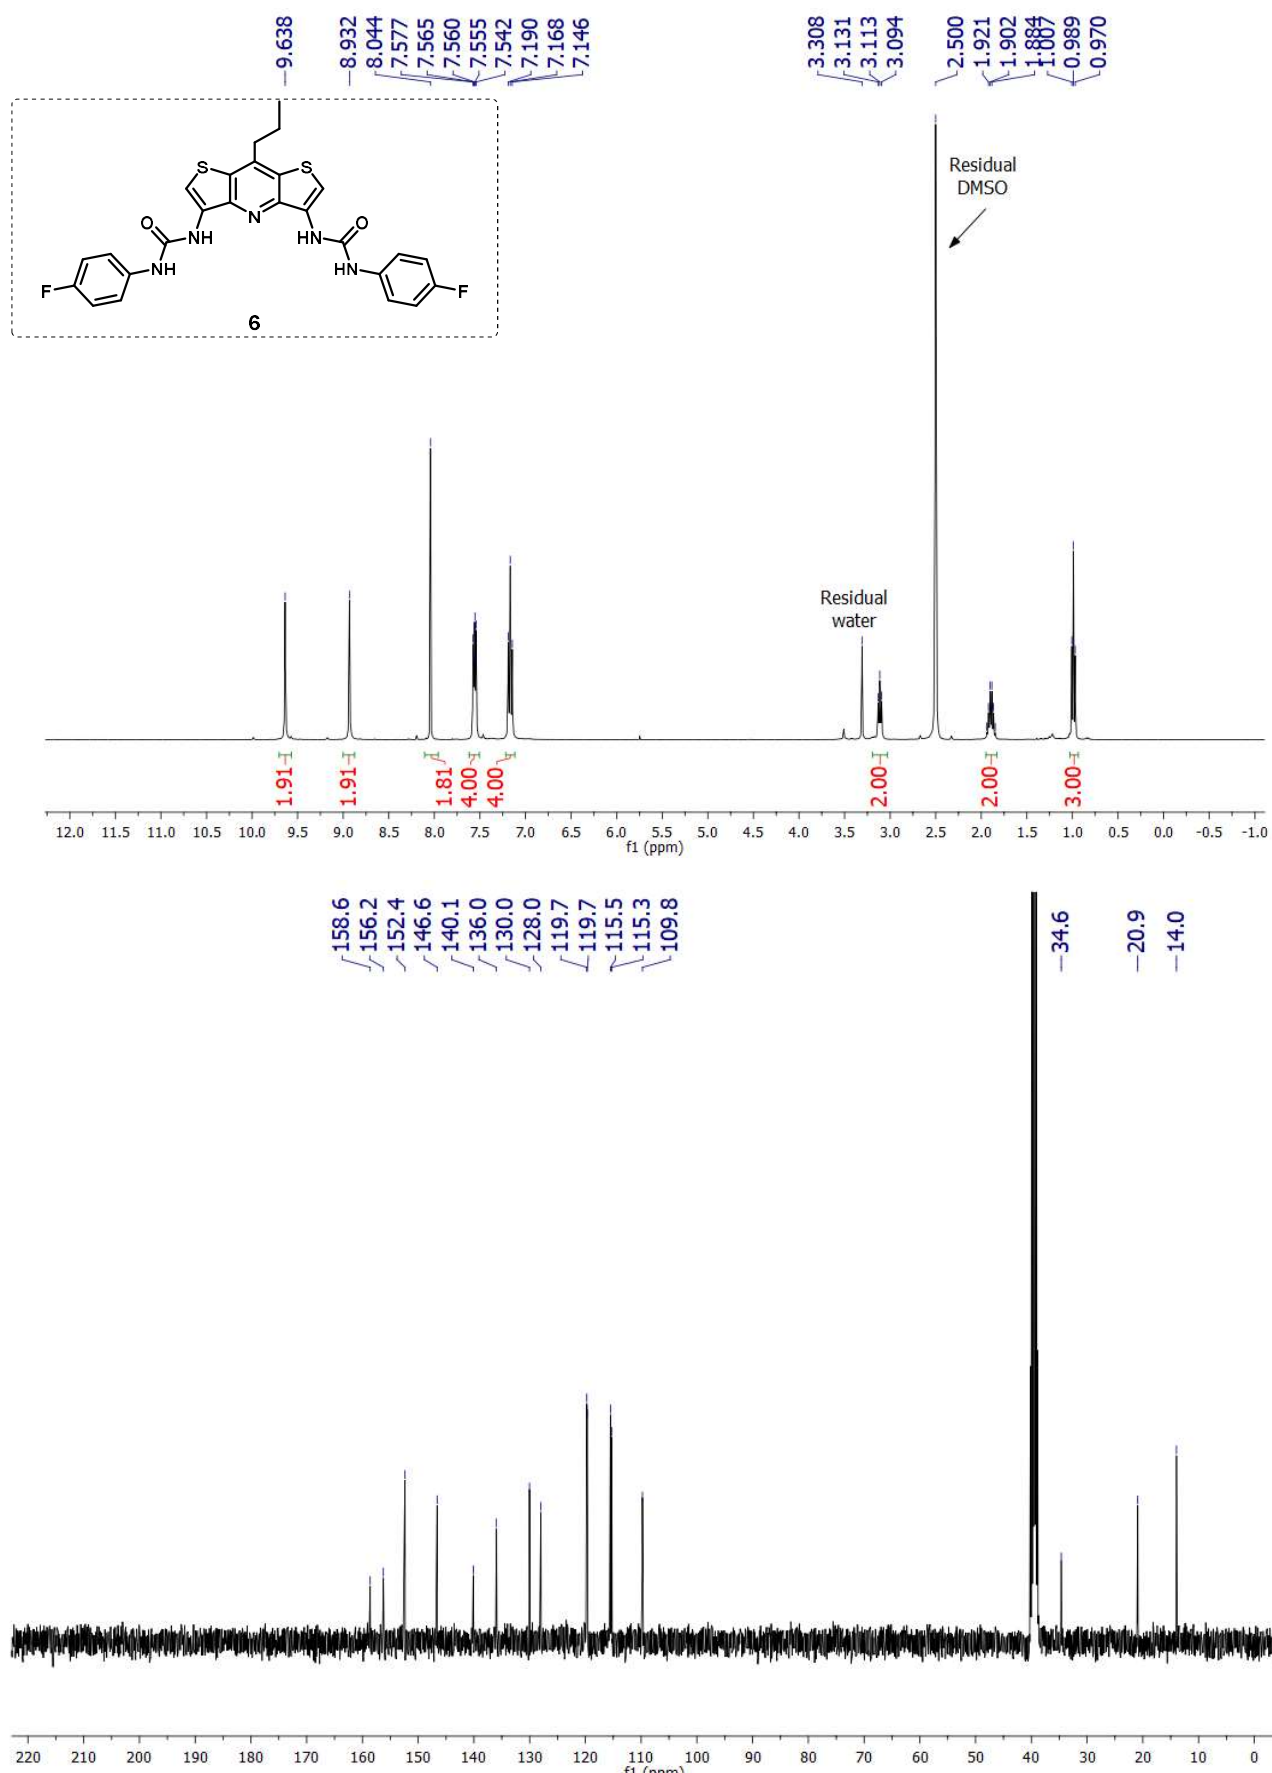

**Figure S4.** <sup>1</sup>H NMR (400 MHz) and <sup>13</sup>C NMR (100 MHz) spectra of compound **6** in DMSO-*d*<sub>6</sub>.

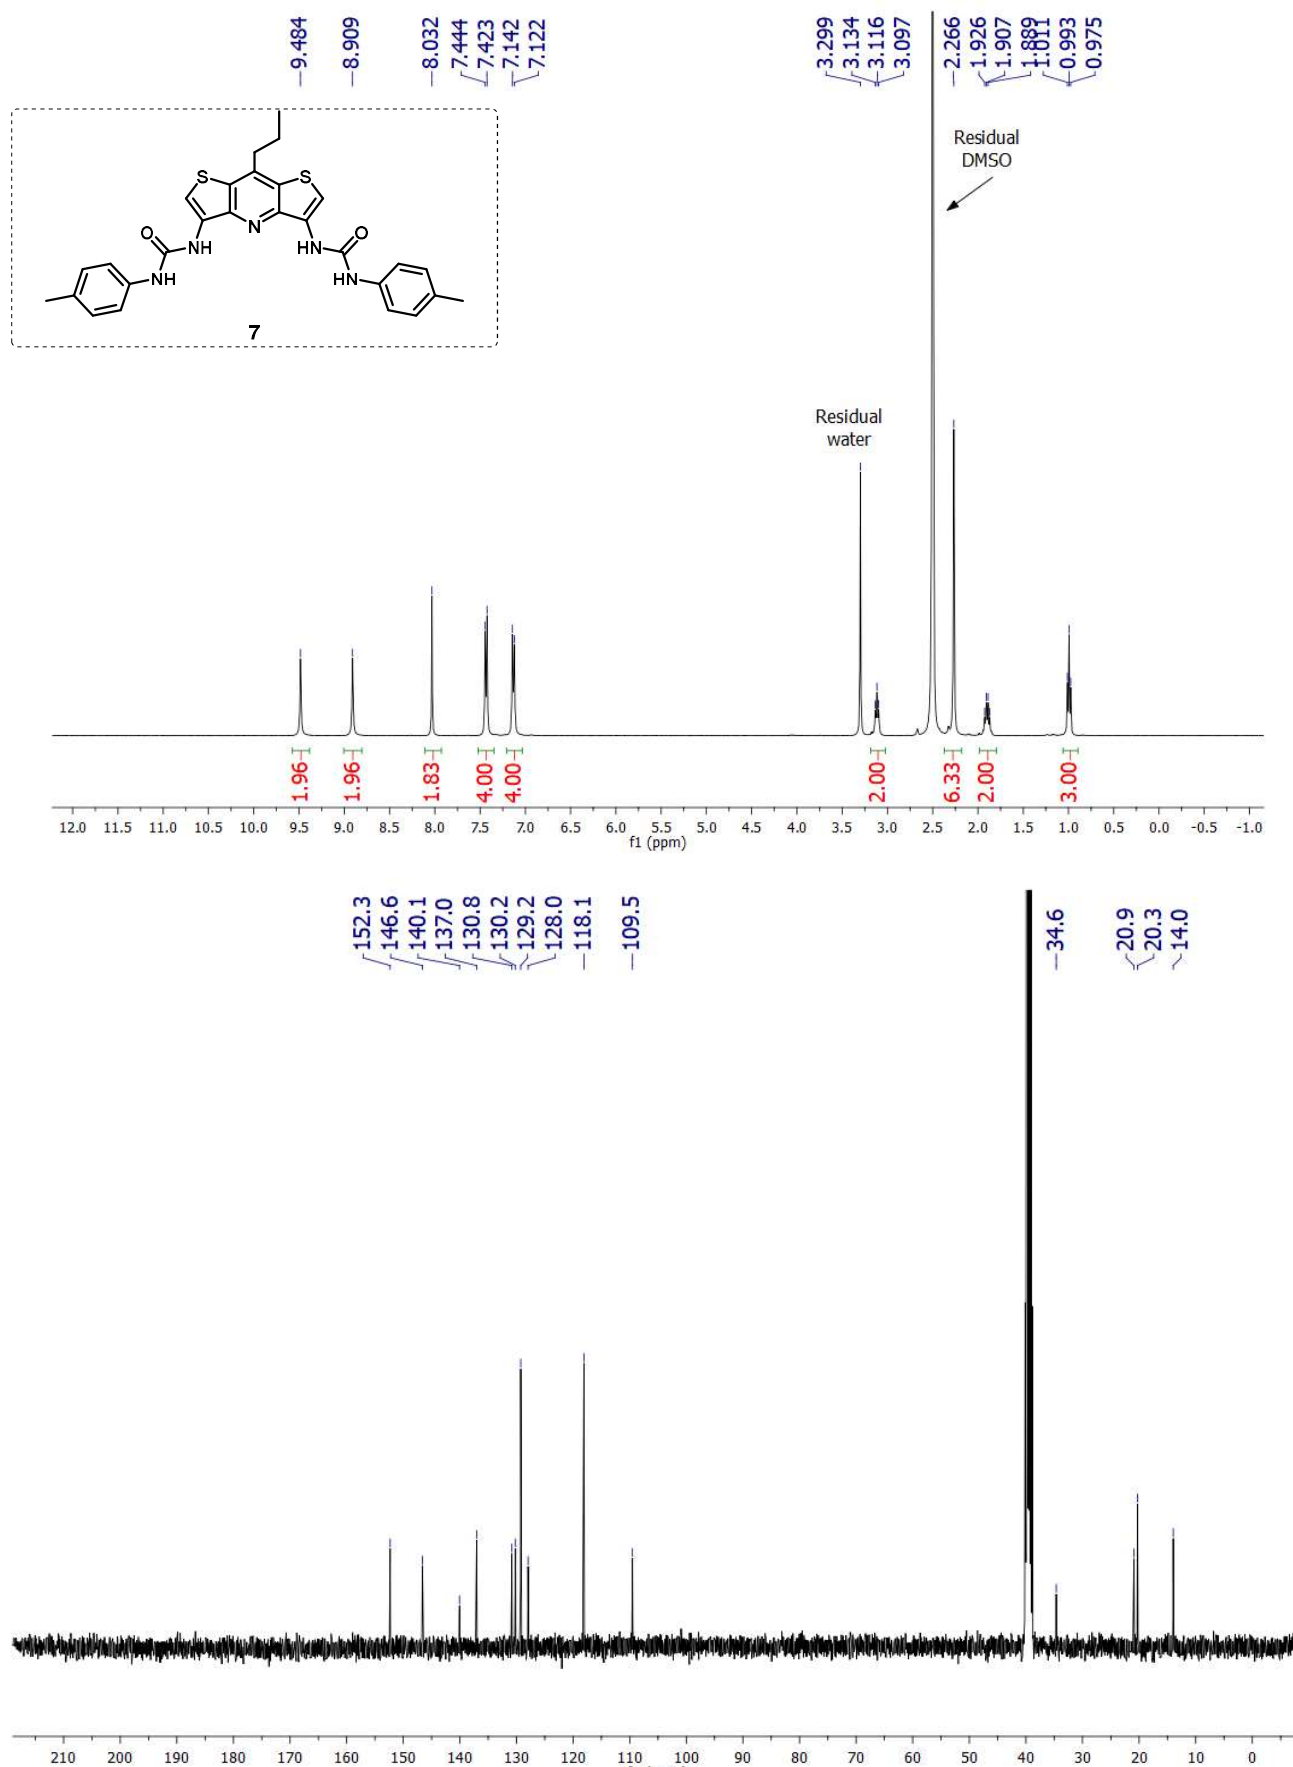

**Figure S5.** <sup>1</sup>H NMR (400 MHz) and <sup>13</sup>C NMR (100 MHz) spectra of compound **7** in DMSO-*d*<sub>6</sub>.



## 4. Titration experiments

As the source of anions, commercially available tetrabutylammonium salts were used. The host solution was titrated in a NMR tube with the solution of the respective TBA salt in receptor aliquots (details are given in Table S3 and S4). The binding constants were calculated from the changes in chemical shifts of ligand protons which were shifted during titration. Nonlinear curve fitting was carried out with HypNMR 2008 [5] (Version 4.0.71) program with fitting to the appropriate global binding model (see Table S3 and S4).

**Table. S3.** Titration details and global stability constants  $K_a$  ( $M^{-1}$ ) for Receptors **5-7** with various anions in DMSO- $d_6$  + 0.5%  $H_2O$ <sup>[a]</sup>

| Entry | Receptor | Anion       | $C_{Host}$ [M] | $C_{Guest}$ [M] | $K_a$ [ $M^{-1}$ ]     |
|-------|----------|-------------|----------------|-----------------|------------------------|
| 1     | <b>5</b> | $Cl^-$      | 0.01021        | 0.11190         | 3400±80                |
| 2     |          | $MeCO_2^-$  |                | 0.11144         | >10000 <sup>[b]</sup>  |
| 3     |          | $PhCO_2^-$  |                | 0.08957         | >10000 <sup>[b]</sup>  |
| 4     |          | $H_2PO_4^-$ |                | 0.13135         | - <sup>[c]</sup>       |
| 5     | <b>6</b> | $Cl^-$      | 0.01039        | 0.12261         | 4650±250               |
| 6     |          | $MeCO_2^-$  |                | 0.09386         | > 10000 <sup>[b]</sup> |
| 7     |          | $PhCO_2^-$  |                | 0.09747         | > 10000 <sup>[b]</sup> |
| 8     |          | $H_2PO_4^-$ |                | 0.09582         | - <sup>[c]</sup>       |
| 9     | <b>7</b> | $Cl^-$      | 0.01011        | 0.12144         | 2500±50                |
| 10    |          | $MeCO_2^-$  |                | 0.09195         | > 10000 <sup>[b]</sup> |
| 11    |          | $H_2PO_4^-$ |                | 0.12078         | - <sup>[c]</sup>       |

[a] Values determined by  $^1H$  NMR titration experiments at  $T = 303K$  using HypNMR 2008 software [5], errors < 10%, TBA salts as the source of anions. [b] Stability constants above the limit of the  $^1H$  NMR titration technique ( $\geq 10000$ ). [c] Not determined.

**Tab. S4.** Titration details and global stability constants  $K_a$  ( $M^{-1}$ ) for Receptors **5-7** with various anions in DMSO- $d_6$  + 10%  $CD_3OH$ <sup>[a]</sup>

| Entry | Receptor | Anion       | $C_{Host}$ [M] | $C_{Guest}$ [M] | $K_a$ [ $M^{-1}$ ] |
|-------|----------|-------------|----------------|-----------------|--------------------|
| 1     | <b>5</b> | $Cl^-$      | 0.01024        | 0.10714         | 1040±20            |
| 2     |          | $MeCO_2^-$  |                | 0.09991         | 6300±300           |
| 3     |          | $PhCO_2^-$  |                | 0.09874         | 2400±80            |
| 4     |          | $H_2PO_4^-$ |                | 0.14096         | - <sup>[b]</sup>   |
| 5     | <b>6</b> | $Cl^-$      | 0.01023        | 0.12818         | 1250±20            |
| 6     |          | $MeCO_2^-$  |                | 0.09904         | 6400±300           |
| 7     |          | $PhCO_2^-$  |                | 0.10073         | 2050±40            |
| 8     |          | $H_2PO_4^-$ |                | 0.09361         | - <sup>[b]</sup>   |
| 9     | <b>7</b> | $Cl^-$      | 0.01003        | 0.13525         | 915±10             |
| 10    |          | $MeCO_2^-$  |                | 0.09795         | 2950±150           |
| 11    |          | $H_2PO_4^-$ |                | 0.10495         | - <sup>[b]</sup>   |

<sup>a</sup> Values determined by  $^1H$  NMR titration experiments at  $T = 303K$  using HypNMR 2008 software [5], errors < 10%, TBA salts as the source of anions. <sup>b</sup> Not determined.

**Figure S6.** Labeling of the selected proton peaks of the receptors **5-7**.

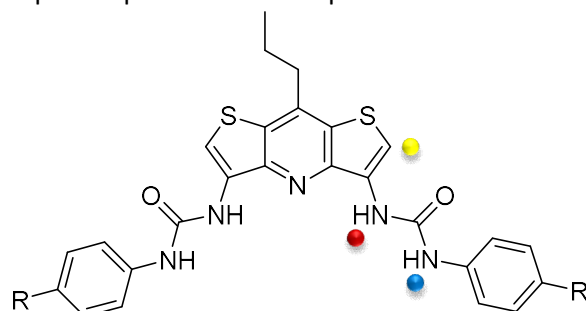

**Table S4.** Corresponding experimental chemical shift changes (symbols) and calculated binding isotherms (lines) assuming 1:1 binding model; Stacked plots from  $^1\text{H}$  NMR titrations of Receptor **5** with increasing amount of  $n\text{-Bu}_4\text{NCl}$  in  $\text{DMSO-}d_6 + 0.5\%$   $\text{H}_2\text{O}$  (v/v).

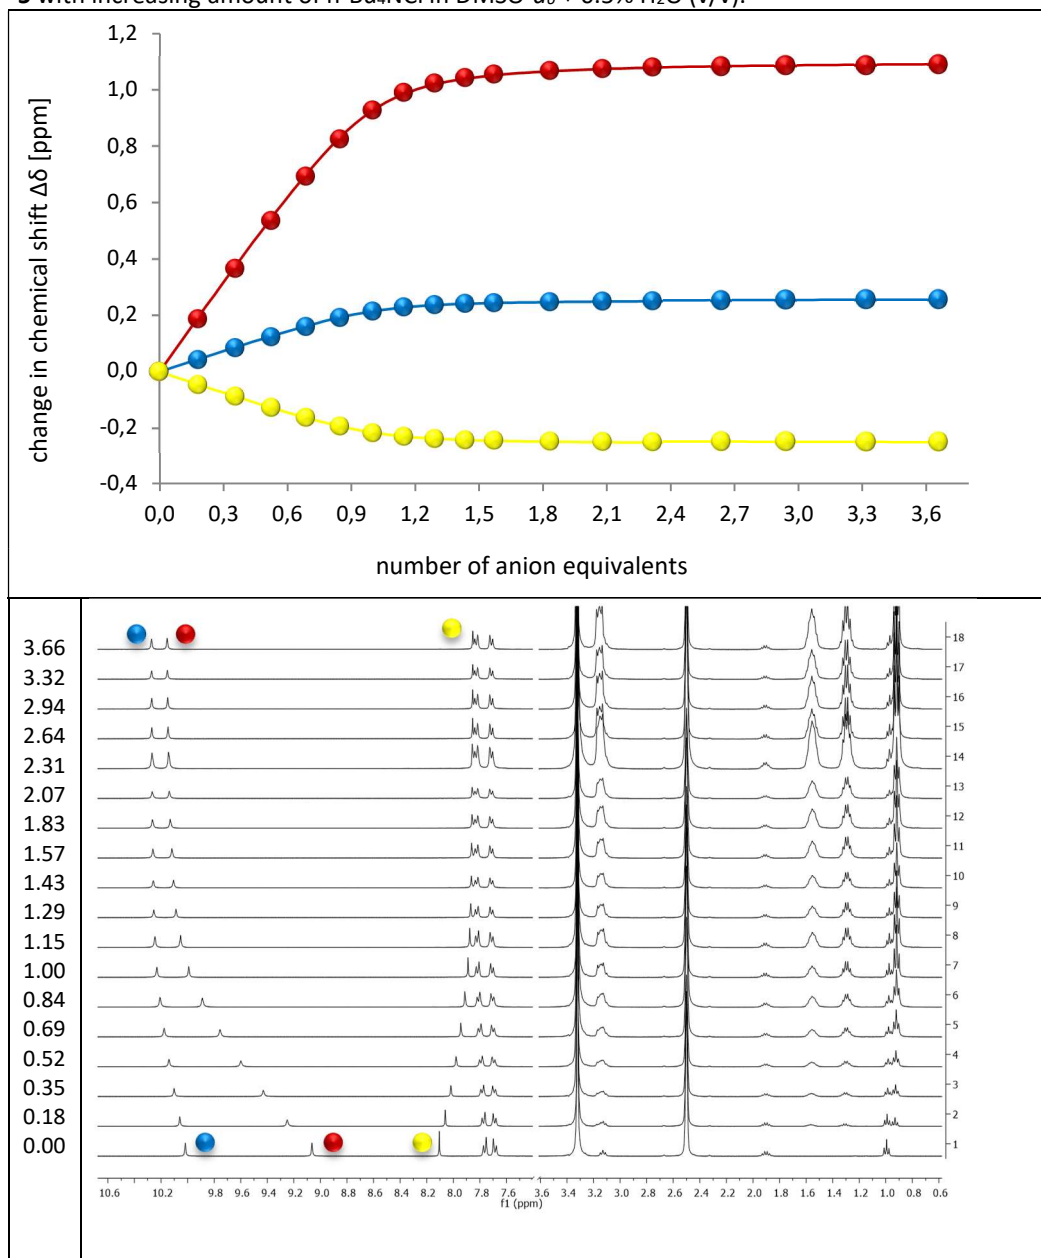

**Table S5.** Corresponding experimental chemical shift changes (symbols) and calculated binding isotherms (lines) assuming 1:1 binding model; Stacked plots from  $^1\text{H}$  NMR titrations of Receptor **5** with increasing amount of  $n\text{-Bu}_4\text{NCO}_2\text{Me}$  in  $\text{DMSO-}d_6 + 0.5\%$   $\text{H}_2\text{O}$  (v/v).

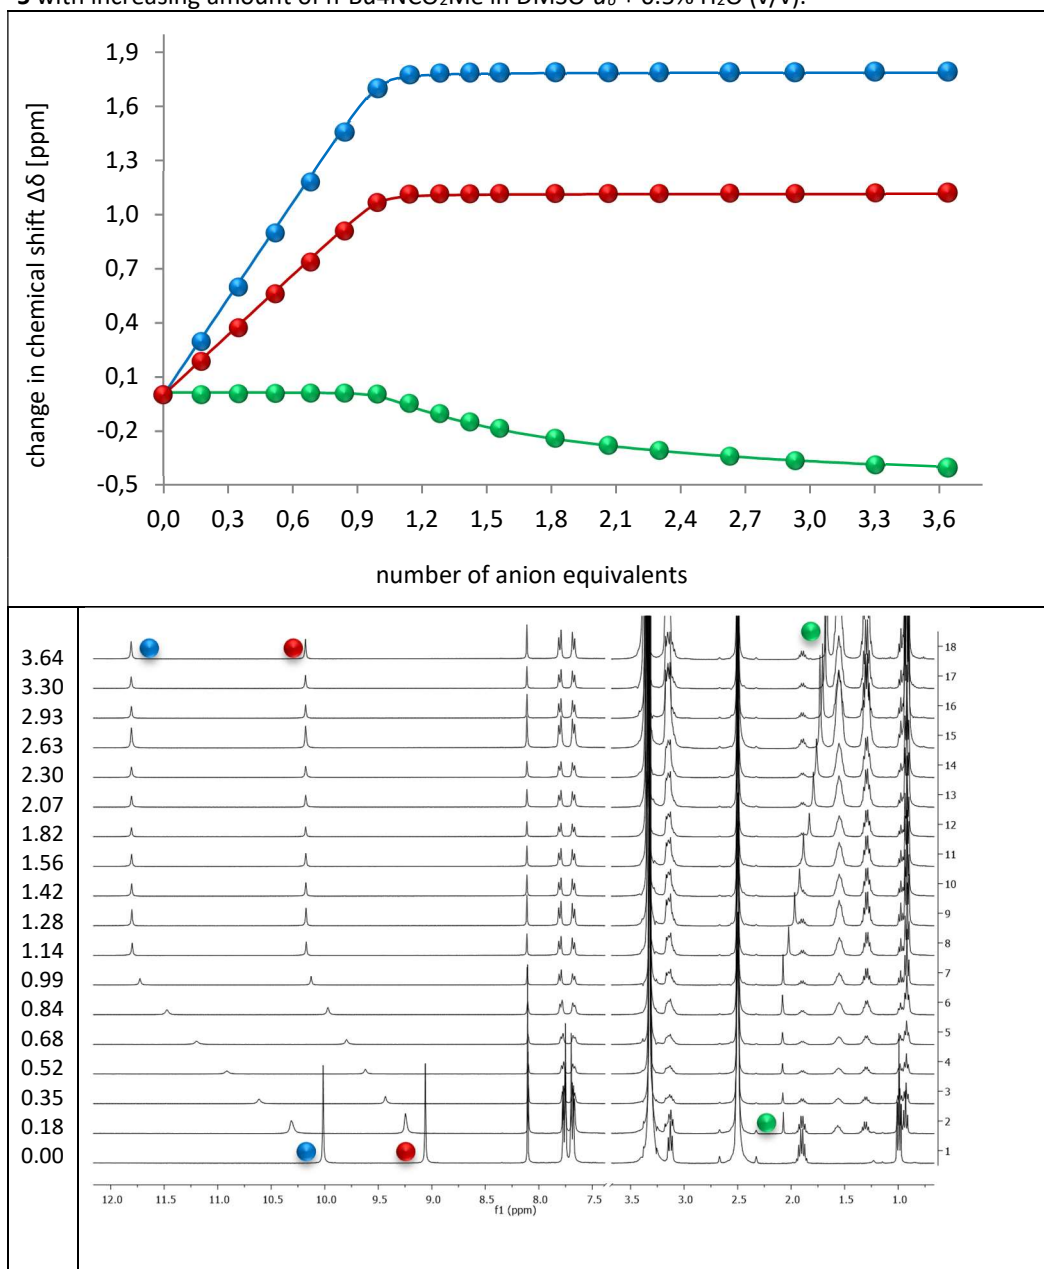

**Table S6.** Corresponding experimental chemical shift changes (symbols) and calculated binding isotherms (lines) assuming 1:1 binding model; Stacked plots from  $^1\text{H}$  NMR titrations of Receptor **5** with increasing amount of  $n\text{-Bu}_4\text{NCO}_2\text{Ph}$  in  $\text{DMSO-}d_6 + 0.5\% \text{H}_2\text{O}$  (v/v).

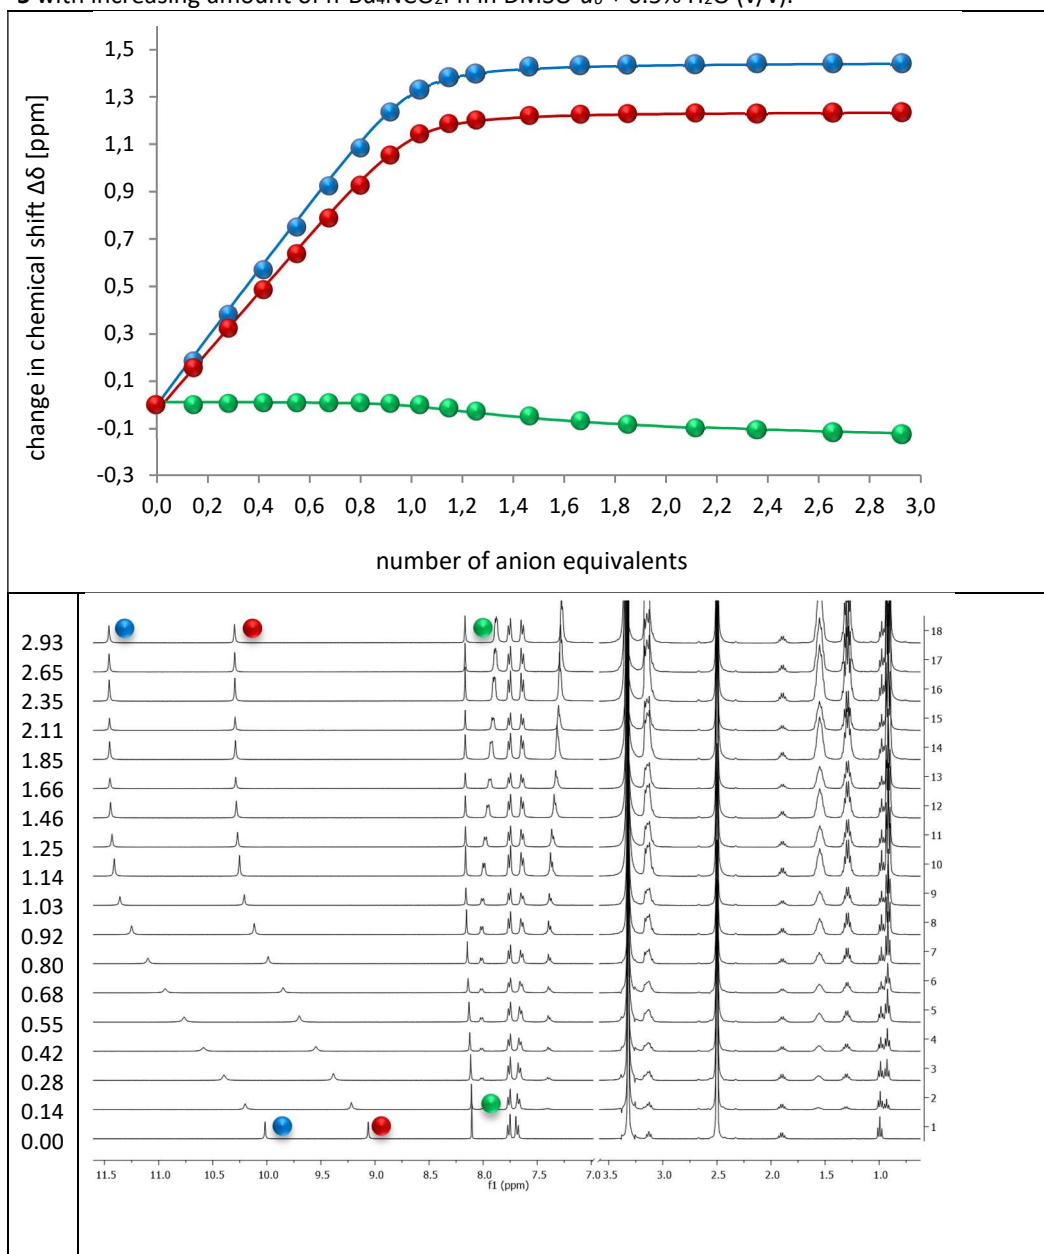

**Table S7.** Corresponding experimental chemical shift changes (symbols) and calculated binding isotherms (lines) assuming 1:1 binding model; Stacked plots from  $^1\text{H}$  NMR titrations of Receptor **5** with increasing amount of  $n\text{-Bu}_4\text{NH}_2\text{PO}_4$  in  $\text{DMSO-}d_6 + 0.5\%$   $\text{H}_2\text{O}$  (v/v).

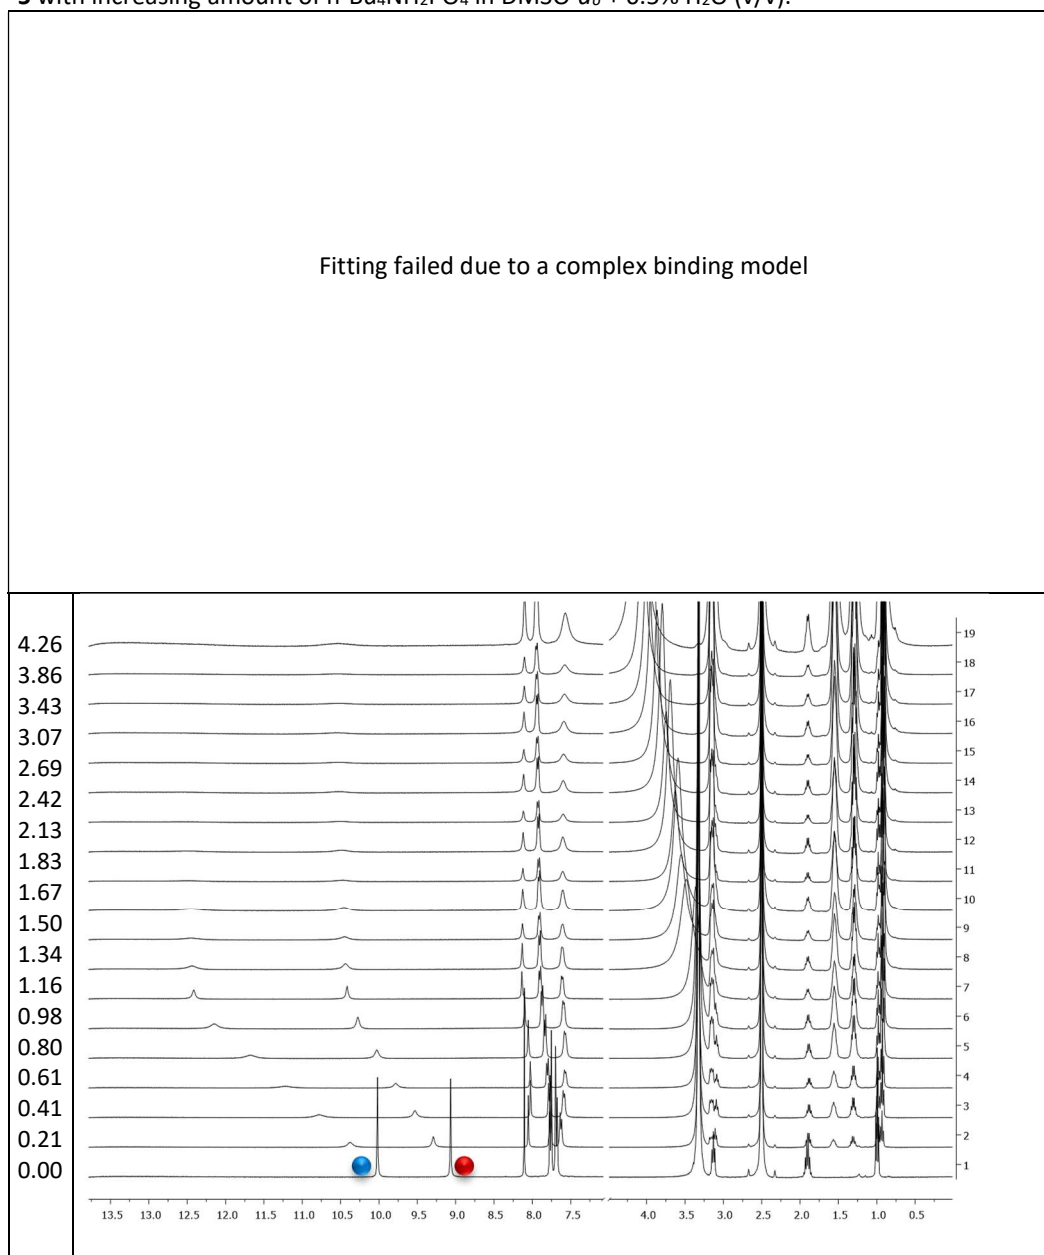

**Table S8.** Corresponding experimental chemical shift changes (symbols) and calculated binding isotherms (lines) assuming 1:1 binding model; Stacked plots from  $^1\text{H}$  NMR titrations of Receptor **5** with increasing amount of  $n\text{-Bu}_4\text{NCl}$  in  $\text{DMSO-}d_6 + 10\% \text{CD}_3\text{OH}$  (v/v).

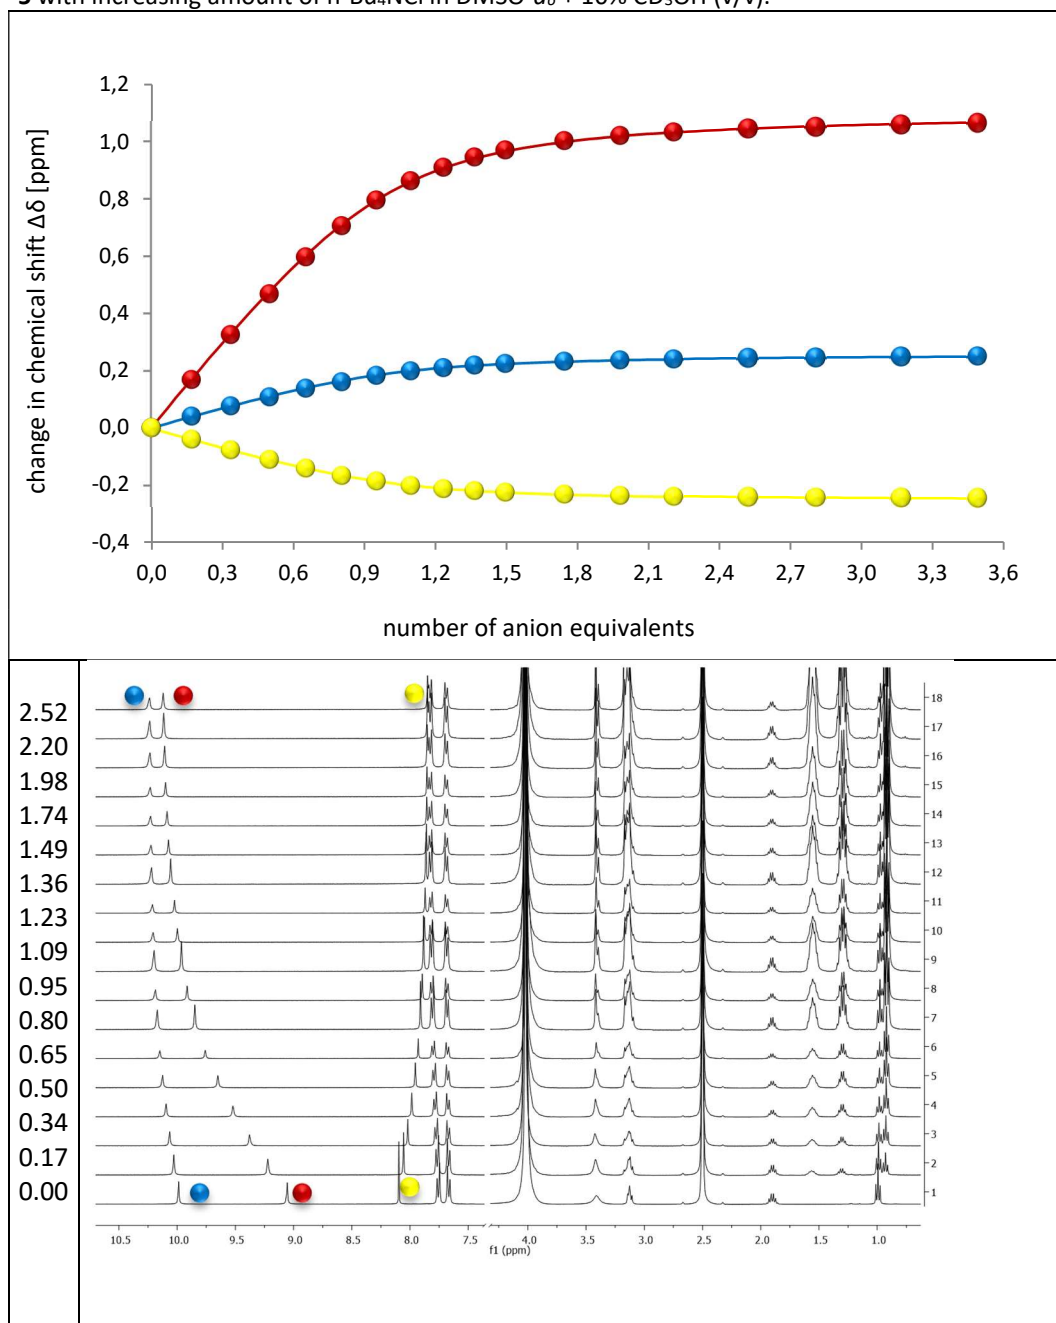

**Table S9.** Corresponding experimental chemical shift changes (symbols) and calculated binding isotherms (lines) assuming 1:1 binding model; Stacked plots from  $^1\text{H}$  NMR titrations of Receptor **5** with increasing amount of  $n\text{-Bu}_4\text{NCO}_2\text{Me}$  in  $\text{DMSO-}d_6 + 10\% \text{CD}_3\text{OH}$  (v/v).

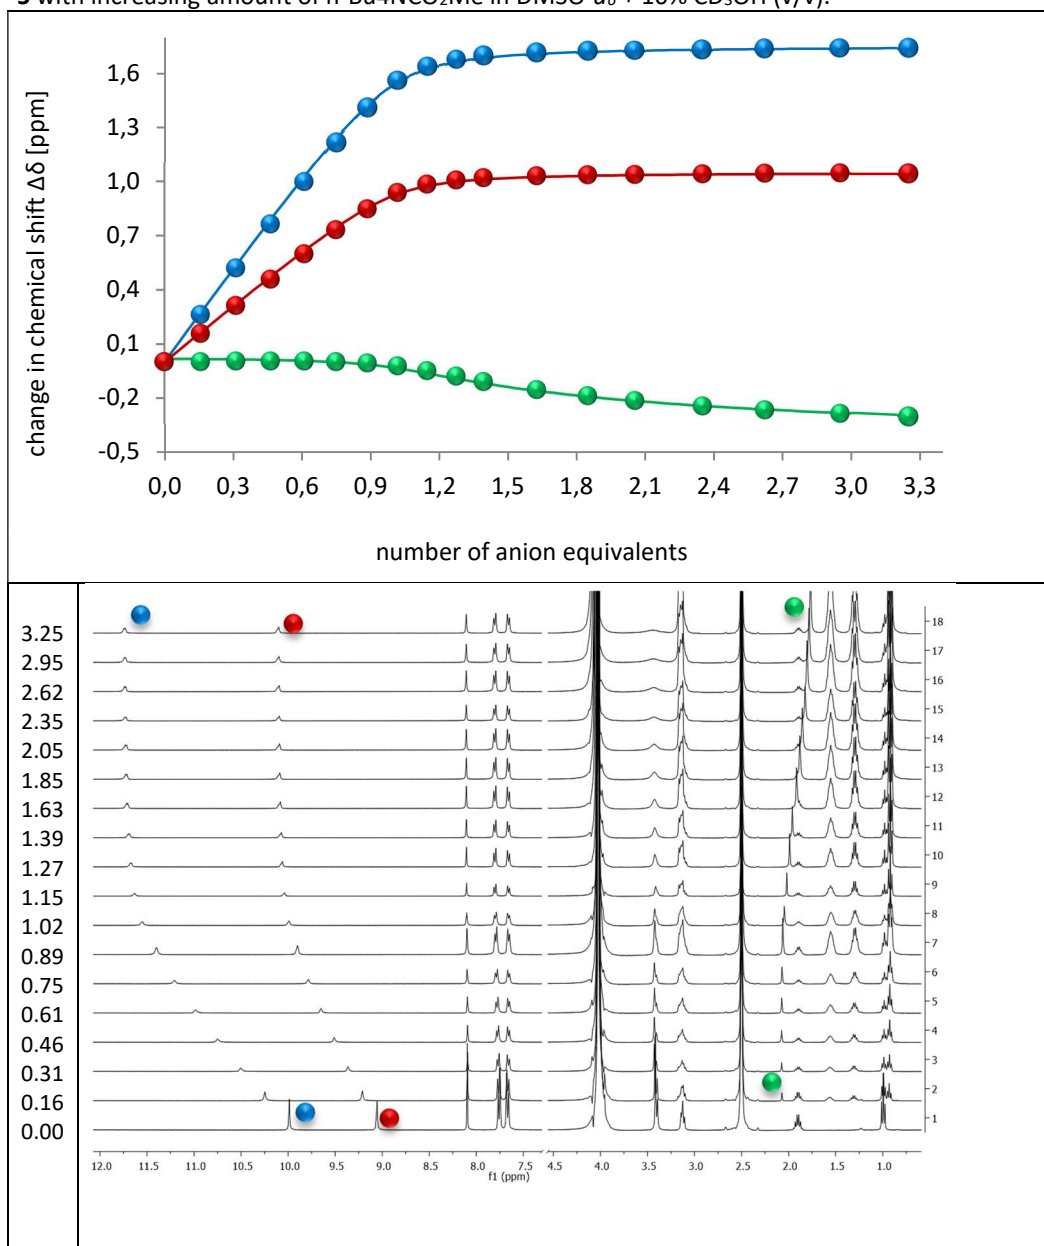

**Table S10.** Corresponding experimental chemical shift changes (symbols) and calculated binding isotherms (lines) assuming 1:1 binding model; Stacked plots from  $^1\text{H}$  NMR titrations of Receptor **5** with increasing amount of  $n\text{-Bu}_4\text{NCO}_2\text{Ph}$  in  $\text{DMSO-}d_6 + 10\% \text{CD}_3\text{OH}$  (v/v).

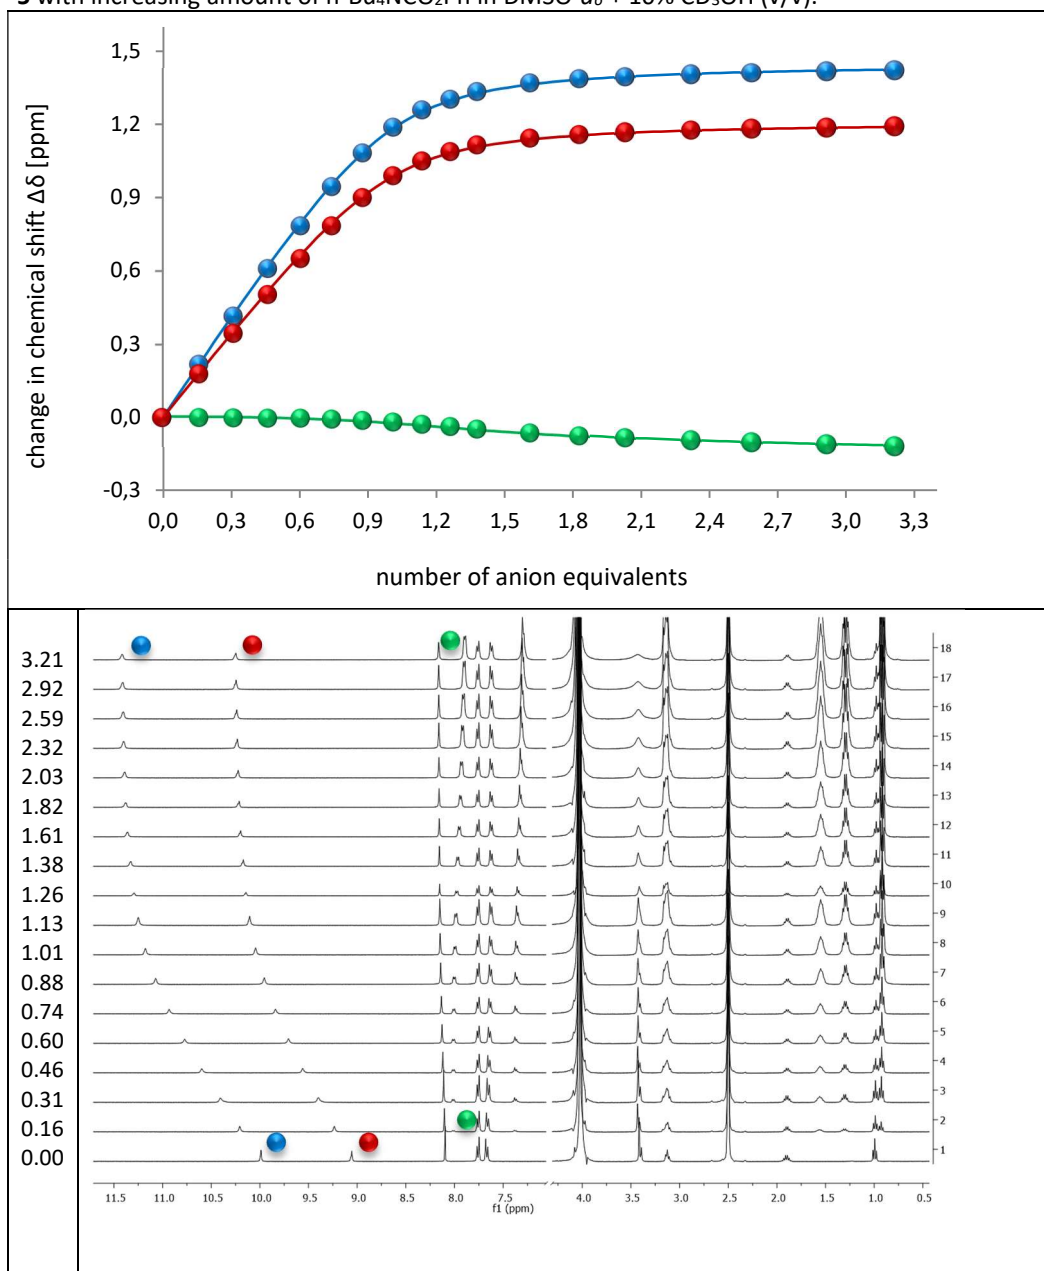



**Table S11.** Corresponding experimental chemical shift changes (symbols) and calculated binding isotherms (lines) assuming 1:1 binding model; Stacked plots from  $^1\text{H}$  NMR titrations of Receptor **5** with increasing amount of  $n\text{-Bu}_4\text{NH}_2\text{PO}_4$  in  $\text{DMSO-}d_6 + 10\% \text{CD}_3\text{OH}$  (v/v).

Fitting failed due to a complex binding model

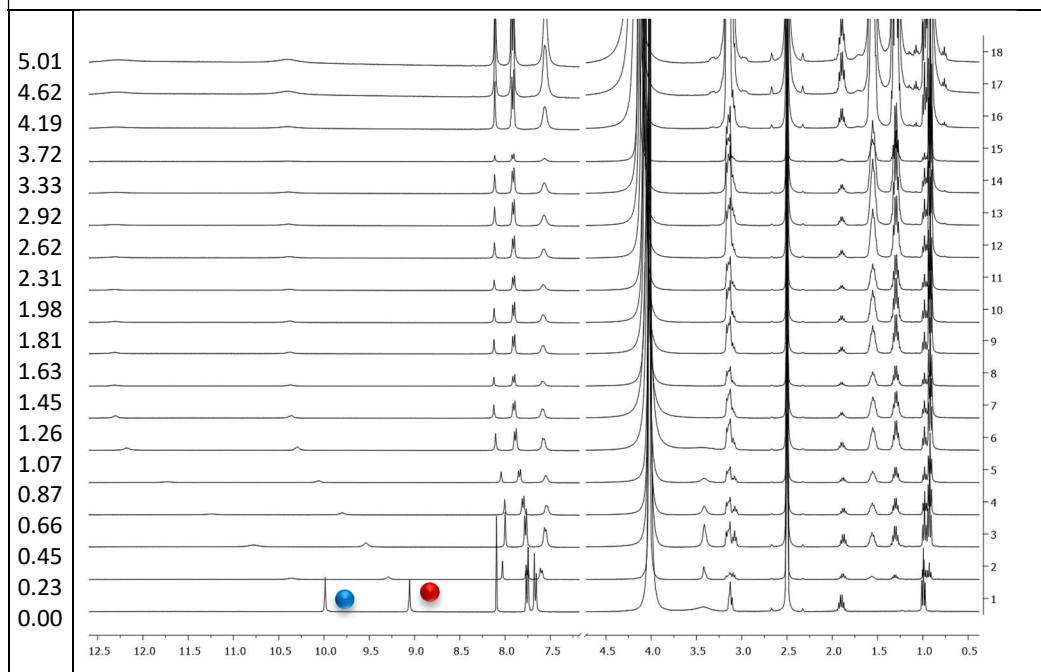

**Table S12.** Corresponding experimental chemical shift changes (symbols) and calculated binding isotherms (lines) assuming 1:1 binding model; Stacked plots from  $^1\text{H}$  NMR titrations of Receptor **6** with increasing amount of  $n\text{-Bu}_4\text{NCl}$  in  $\text{DMSO-}d_6 + 0.5\% \text{H}_2\text{O}$  (v/v).

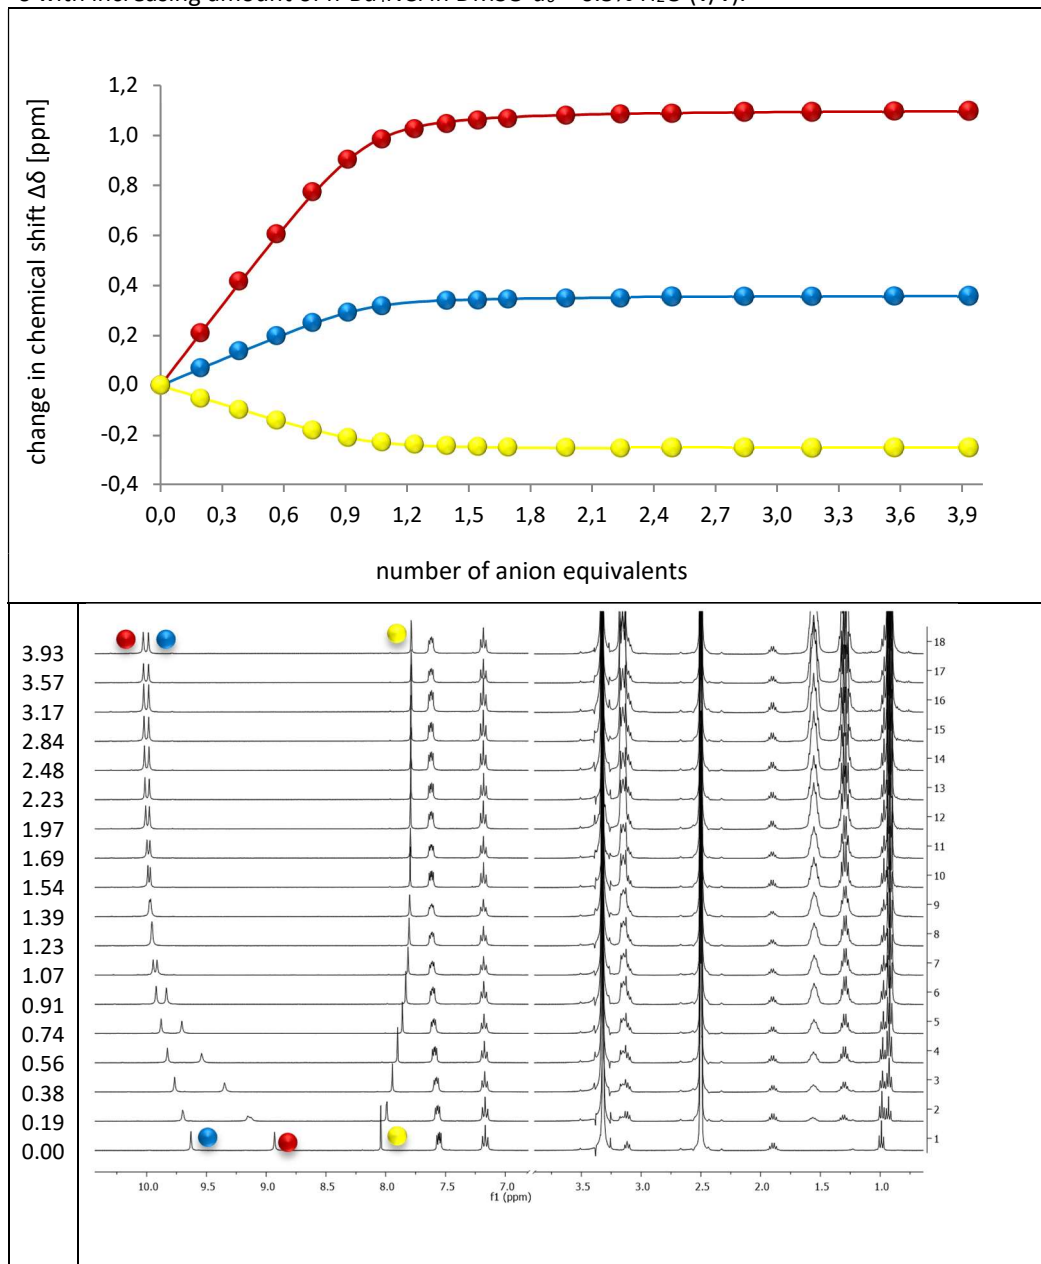

**Table S13.** Corresponding experimental chemical shift changes (symbols) and calculated binding isotherms (lines) assuming 1:1 binding model; Stacked plots from  $^1\text{H}$  NMR titrations of Receptor **6** with increasing amount of  $n\text{-Bu}_4\text{NCO}_2\text{Me}$  in  $\text{DMSO-}d_6 + 0.5\% \text{H}_2\text{O}$  (v/v).

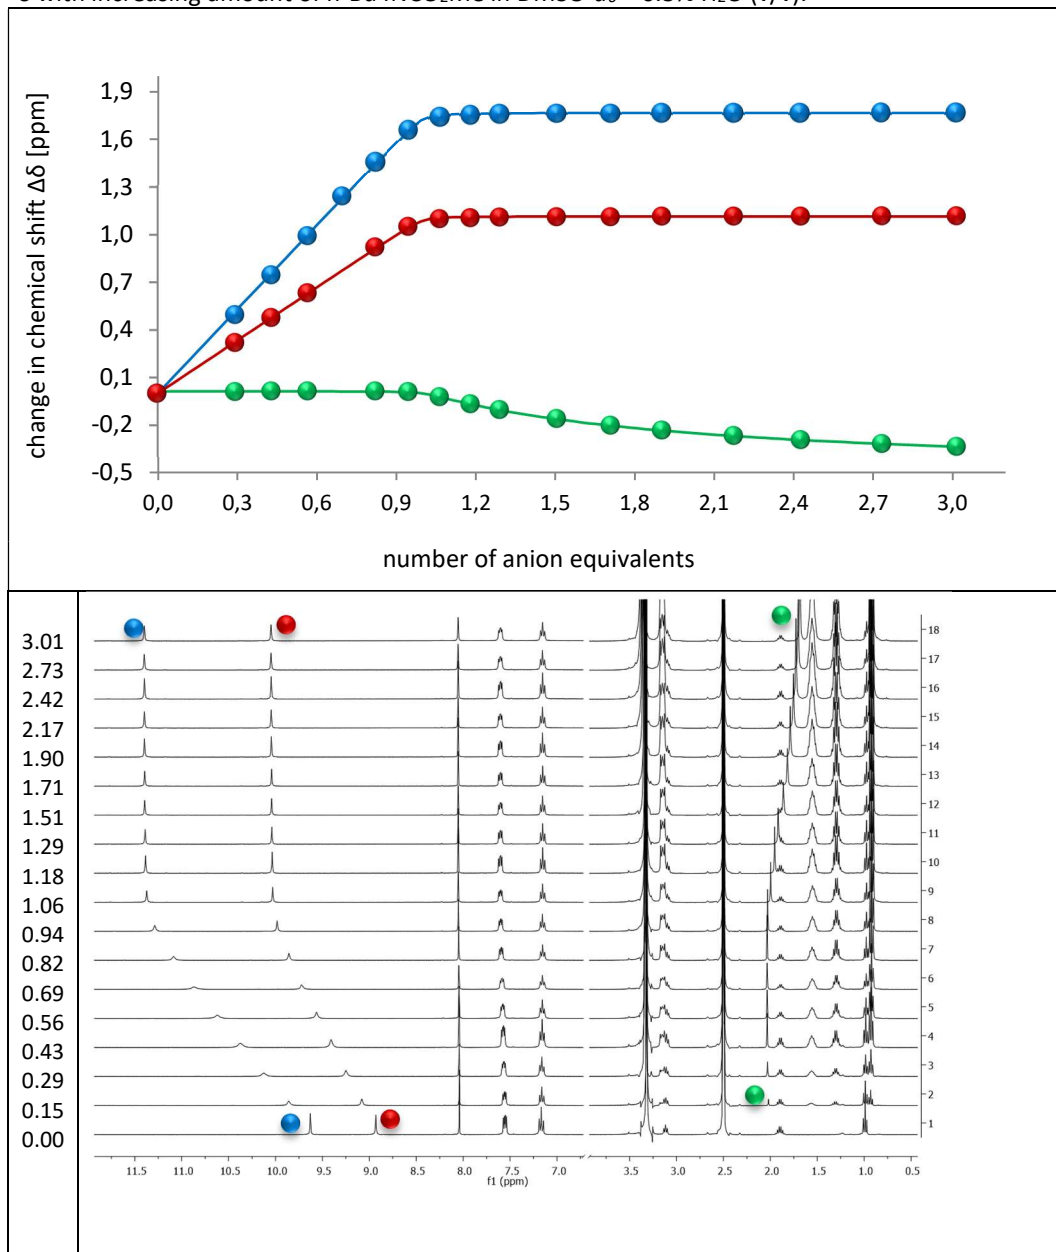

**Table S14.** Corresponding experimental chemical shift changes (symbols) and calculated binding isotherms (lines) assuming 1:1 binding model; Stacked plots from  $^1\text{H}$  NMR titrations of Receptor **6** with increasing amount of  $n\text{-Bu}_4\text{NCO}_2\text{Ph}$  in  $\text{DMSO-}d_6 + 0.5\%$   $\text{H}_2\text{O}$  (v/v).

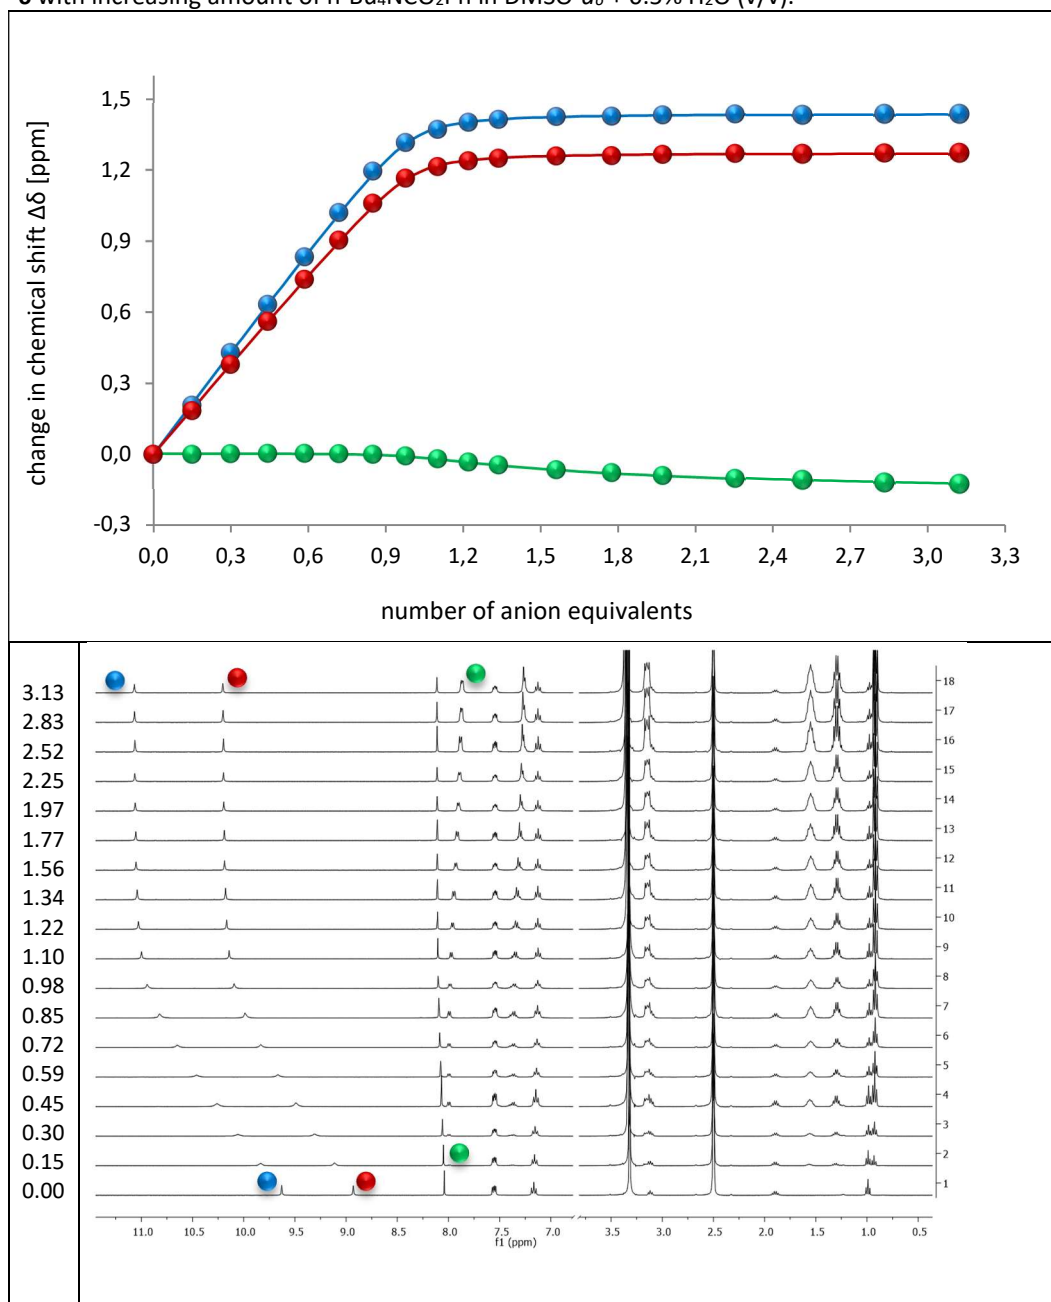

**Table S15.** Corresponding experimental chemical shift changes (symbols) and calculated binding isotherms (lines) assuming 1:1 binding model; Stacked plots from  $^1\text{H}$  NMR titrations of Receptor **6** with increasing amount of  $n\text{-Bu}_4\text{NH}_2\text{PO}_4$  in  $\text{DMSO-}d_6 + 0.5\% \text{H}_2\text{O}$  (v/v).

Fitting failed due to a complex binding model

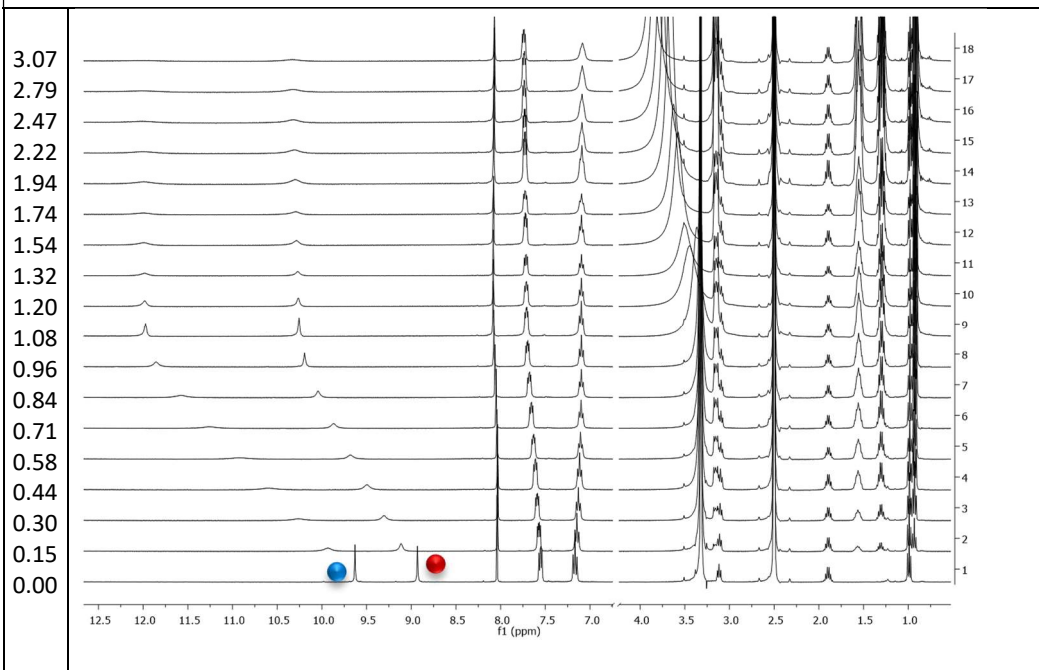

**Table S16.** Corresponding experimental chemical shift changes (symbols) and calculated binding isotherms (lines) assuming 1:1 binding model; Stacked plots from  $^1\text{H}$  NMR titrations of Receptor **6** with increasing amount of  $n\text{-Bu}_4\text{NCl}$  in  $\text{DMSO-}d_6 + 10\% \text{CD}_3\text{OH}$  (v/v).

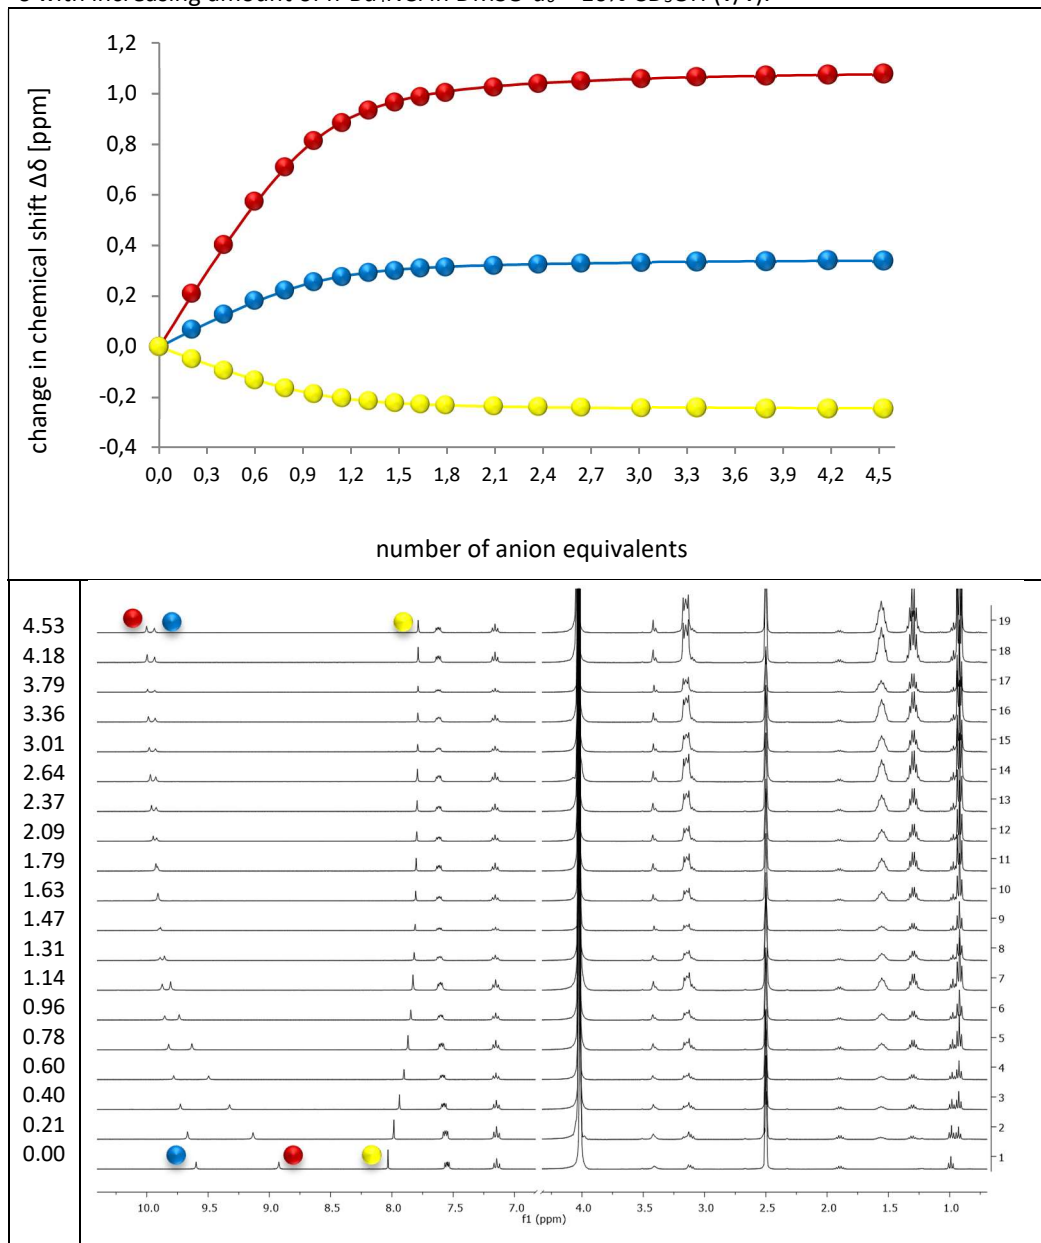

**Table S17.** Corresponding experimental chemical shift changes (symbols) and calculated binding isotherms (lines) assuming 1:1 binding model; Stacked plots from  $^1\text{H}$  NMR titrations of Receptor **6** with increasing amount of  $n\text{-Bu}_4\text{NCO}_2\text{Me}$  in  $\text{DMSO-}d_6 + 10\% \text{CD}_3\text{OH}$  (v/v).

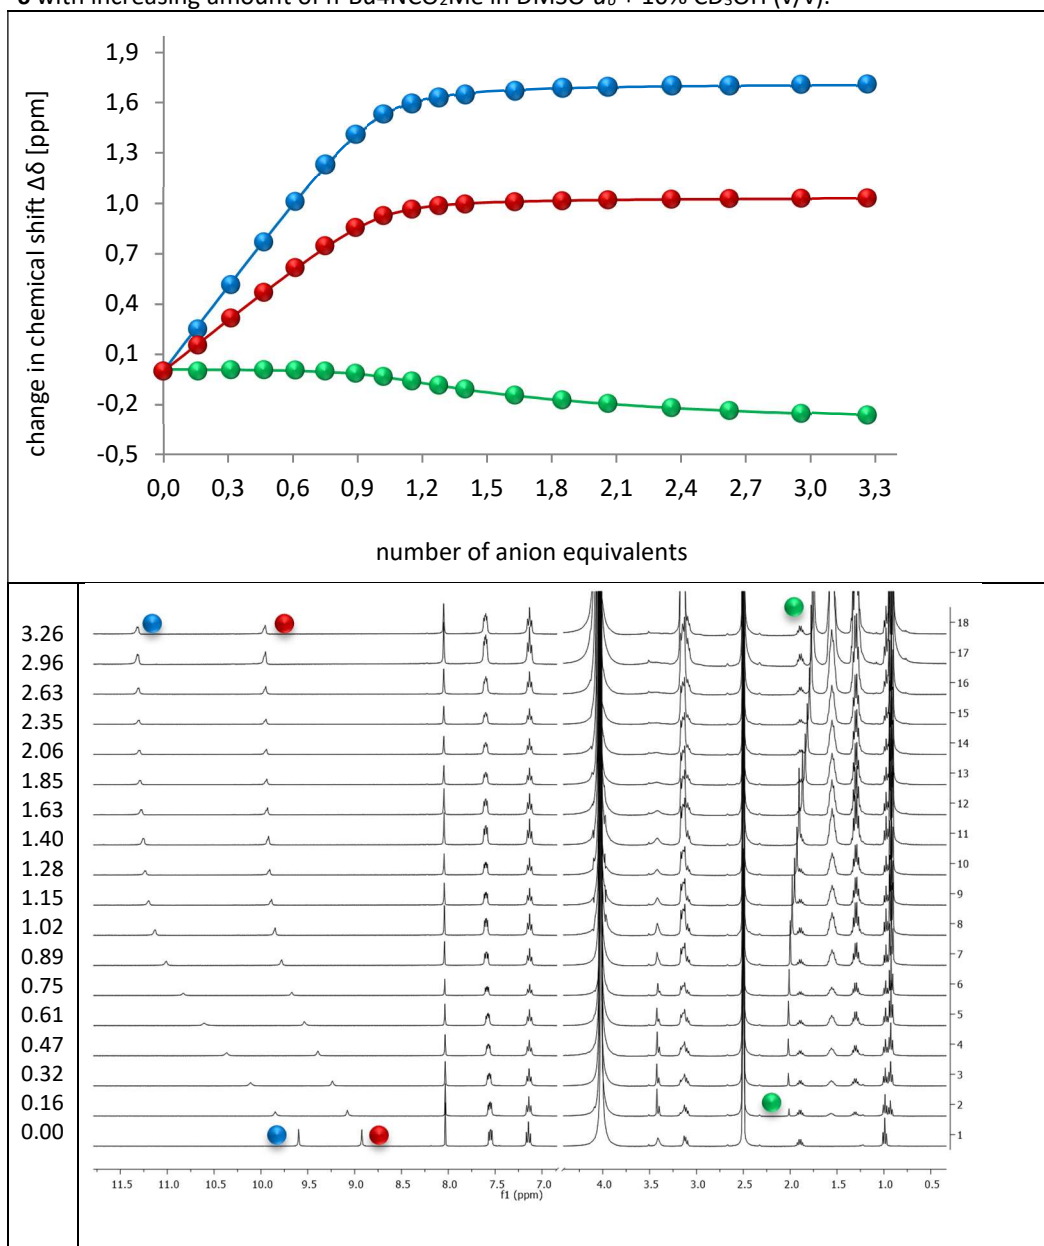

**Table S18.** Corresponding experimental chemical shift changes (symbols) and calculated binding isotherms (lines) assuming 1:1 binding model; Stacked plots from  $^1\text{H}$  NMR titrations of Receptor **6** with increasing amount of  $n\text{-Bu}_4\text{NCO}_2\text{Ph}$  in  $\text{DMSO-}d_6 + 10\% \text{CD}_3\text{OH}$  (v/v).

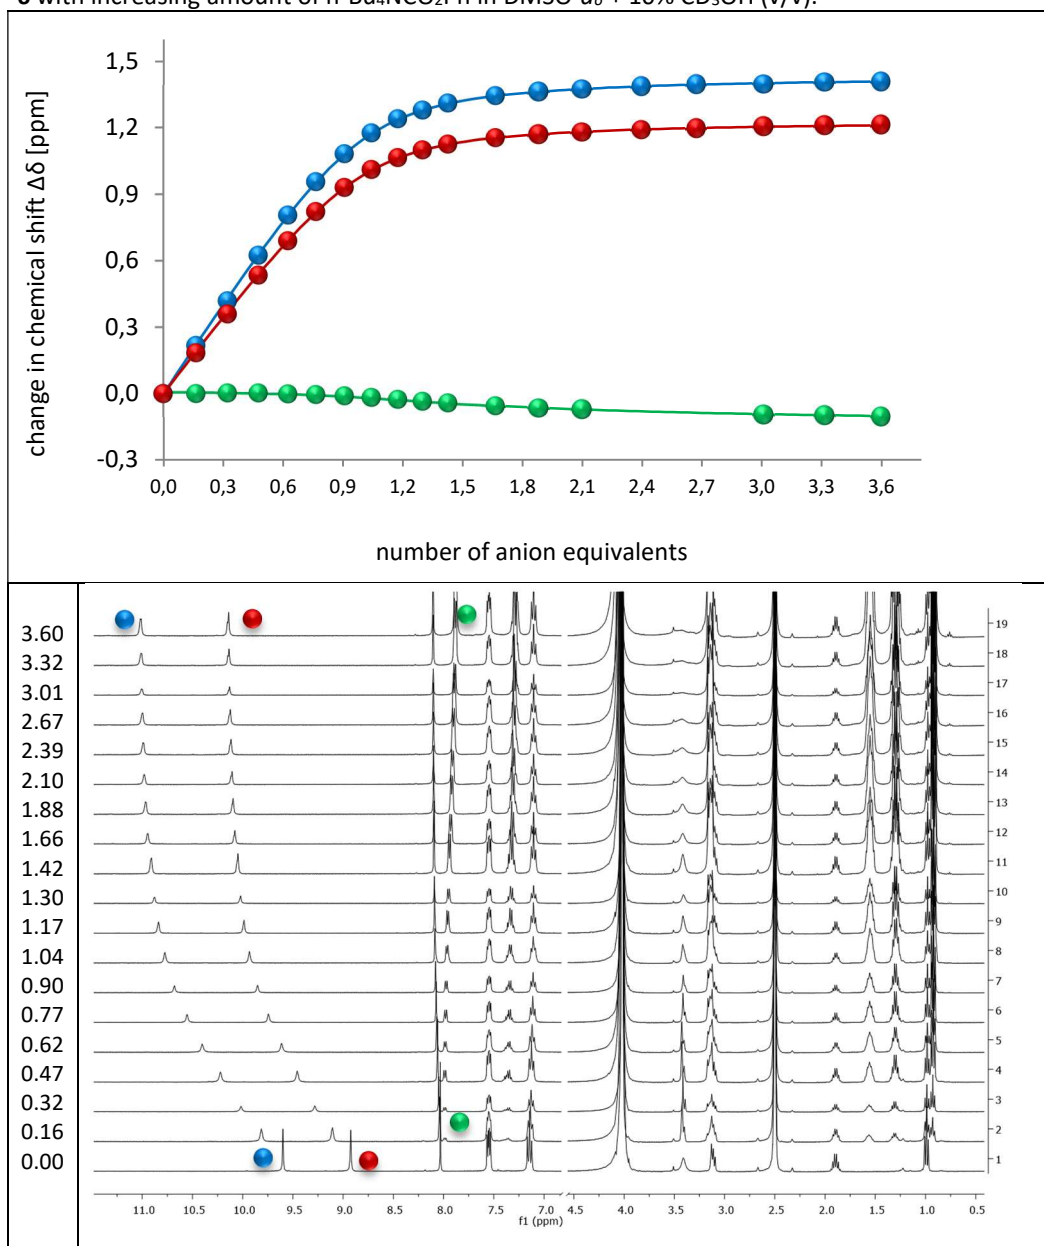



**Table S19.** Corresponding experimental chemical shift changes (symbols) and calculated binding isotherms (lines) assuming 1:1 binding model; Stacked plots from  $^1\text{H}$  NMR titrations of Receptor **6** with increasing amount of  $n\text{-Bu}_4\text{NH}_2\text{PO}_4$  in  $\text{DMSO-}d_6 + 10\% \text{CD}_3\text{OH}$  (v/v).

Fitting failed due to a complex binding model

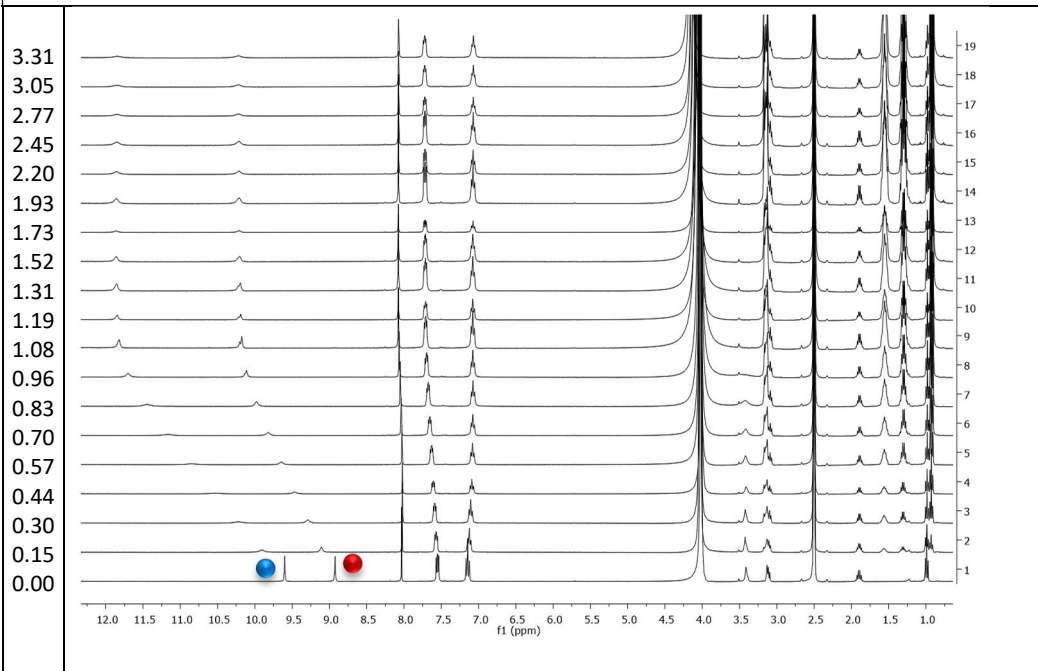

**Table S20.** Corresponding experimental chemical shift changes (symbols) and calculated binding isotherms (lines) assuming 1:1 binding model; Stacked plots from  $^1\text{H}$  NMR titrations of Receptor **7** with increasing amount of  $n\text{-Bu}_4\text{NCl}$  in  $\text{DMSO-}d_6 + 0.5\% \text{H}_2\text{O}$  (v/v).

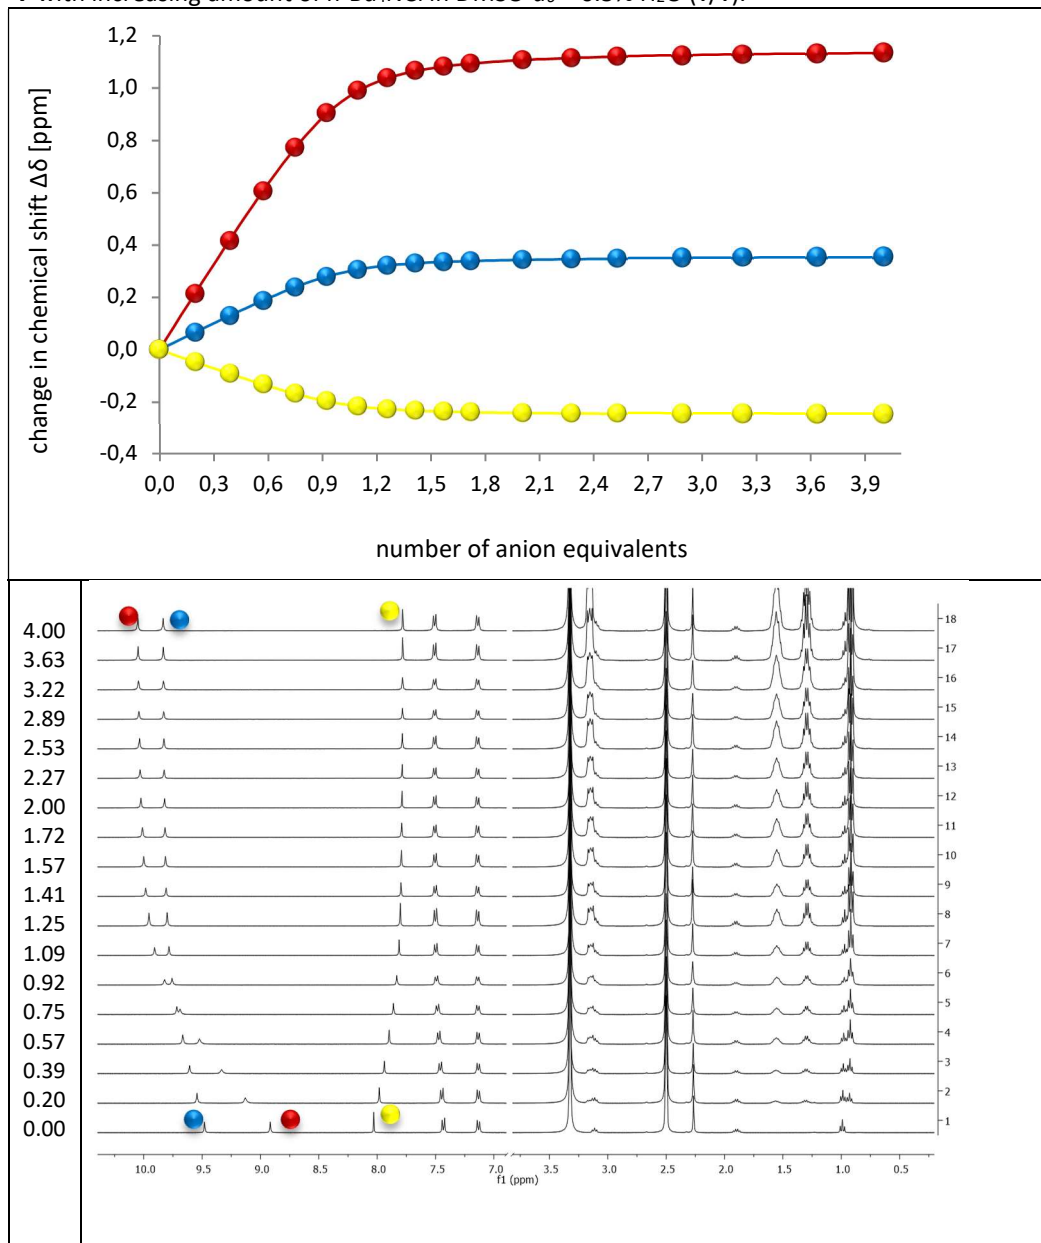

**Table S21.** Corresponding experimental chemical shift changes (symbols) and calculated binding isotherms (lines) assuming 1:1 binding model; Stacked plots from  $^1\text{H}$  NMR titrations of Receptor **7** with increasing amount of n-Bu $_4\text{NCO}_2\text{Me}$  in DMSO- $d_6$  + 0.5% H $_2\text{O}$  (v/v).

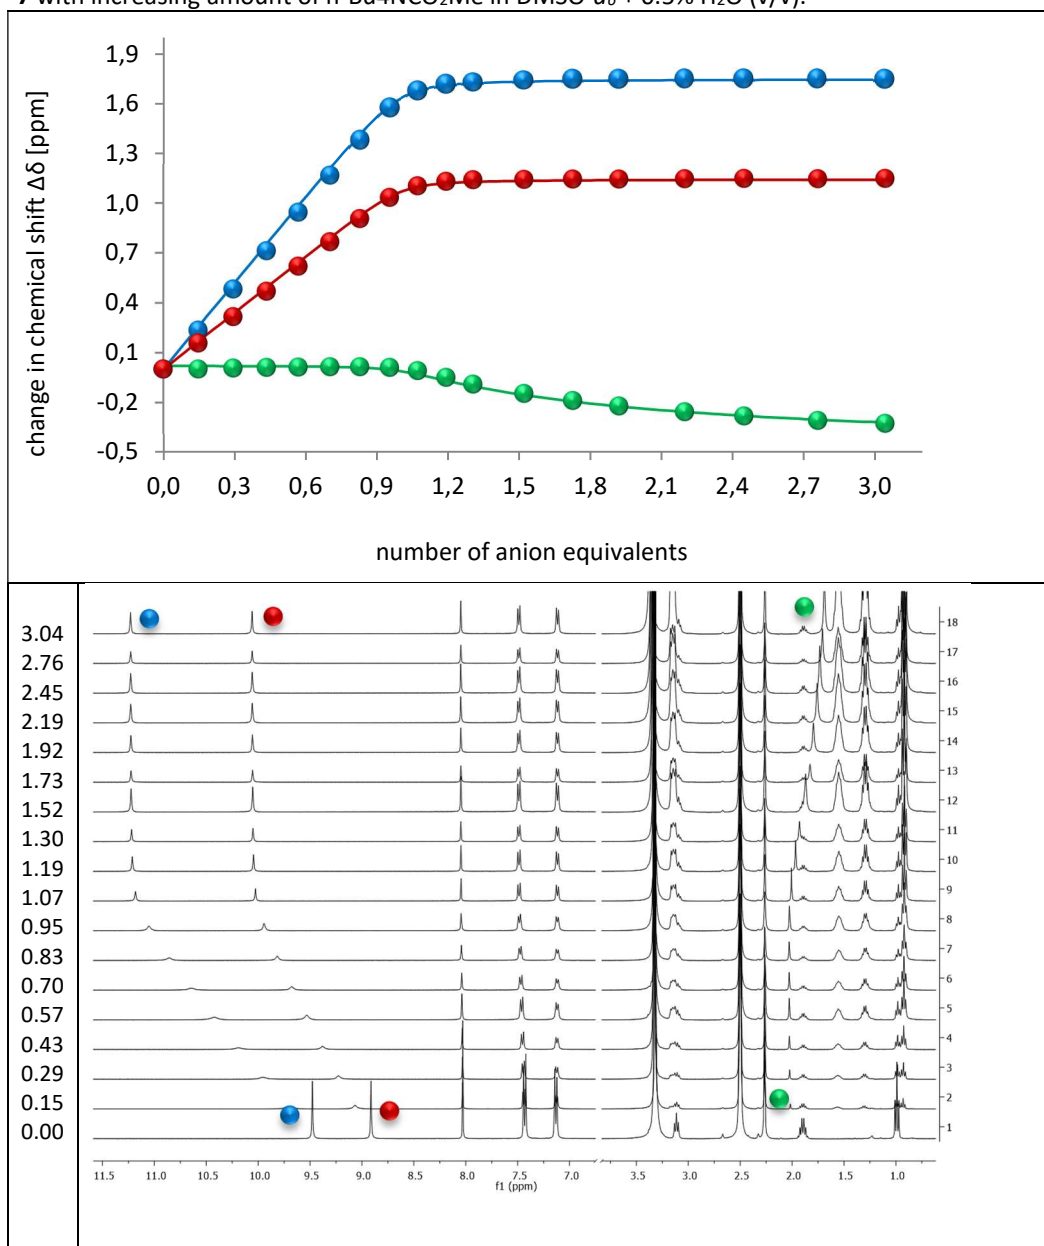

**Table S22.** Corresponding experimental chemical shift changes (symbols) and calculated binding isotherms (lines) assuming 1:1 binding model; Stacked plots from  $^1\text{H}$  NMR titrations of Receptor **7** with increasing amount of  $n\text{-Bu}_4\text{NH}_2\text{PO}_4$  in  $\text{DMSO-}d_6 + 0.5\%$   $\text{H}_2\text{O}$  (v/v).

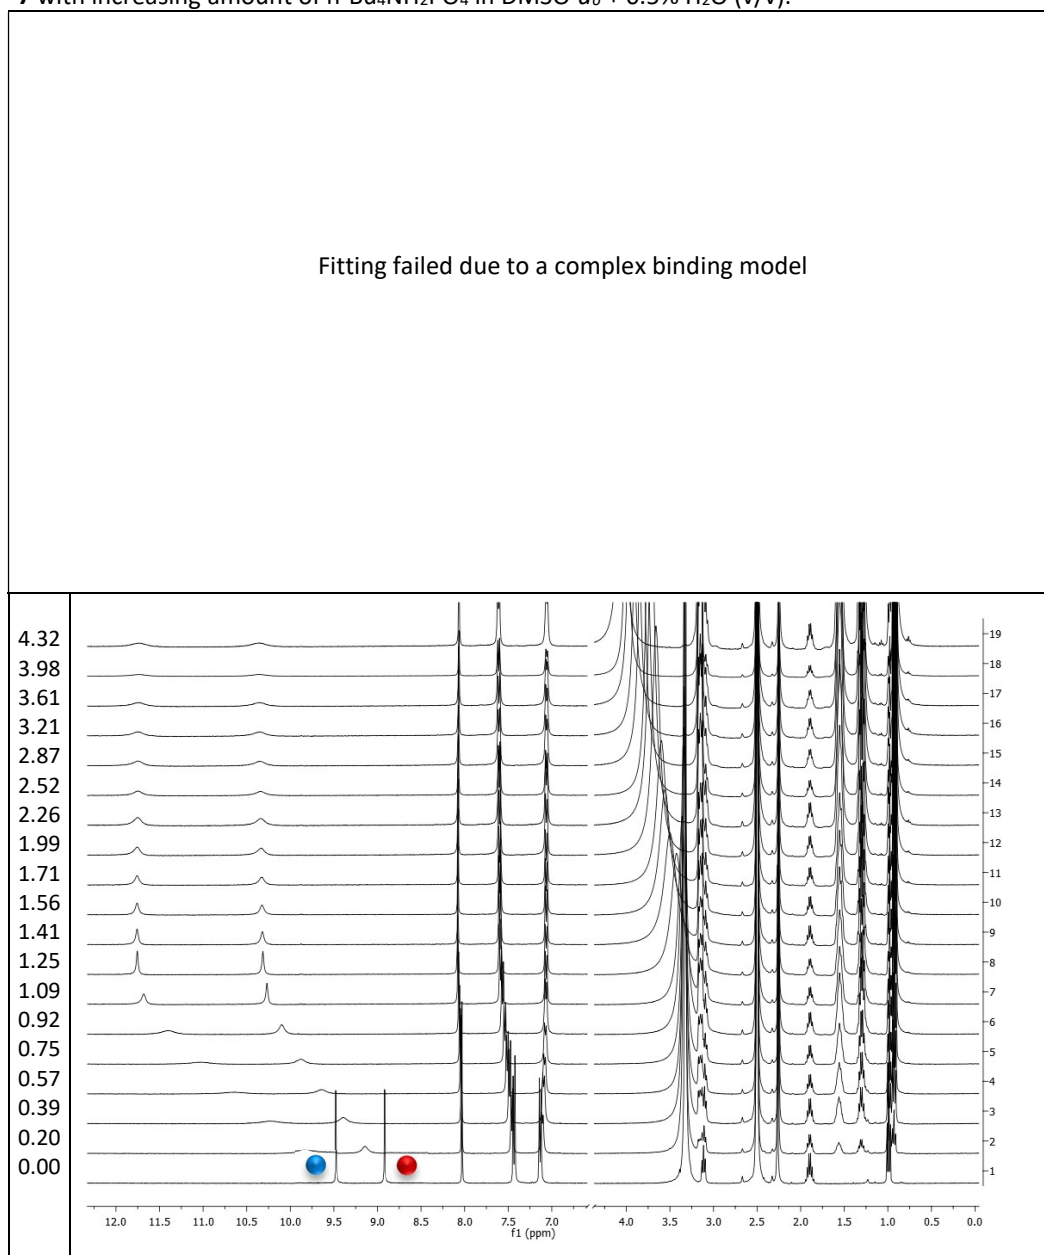

**Table S23.** Corresponding experimental chemical shift changes (symbols) and calculated binding isotherms (lines) assuming 1:1 binding model; Stacked plots from  $^1\text{H}$  NMR titrations of Receptor **7** with increasing amount of  $n\text{-Bu}_4\text{NCl}$  in  $\text{DMSO-}d_6 + 10\% \text{CD}_3\text{OH}$  (v/v).

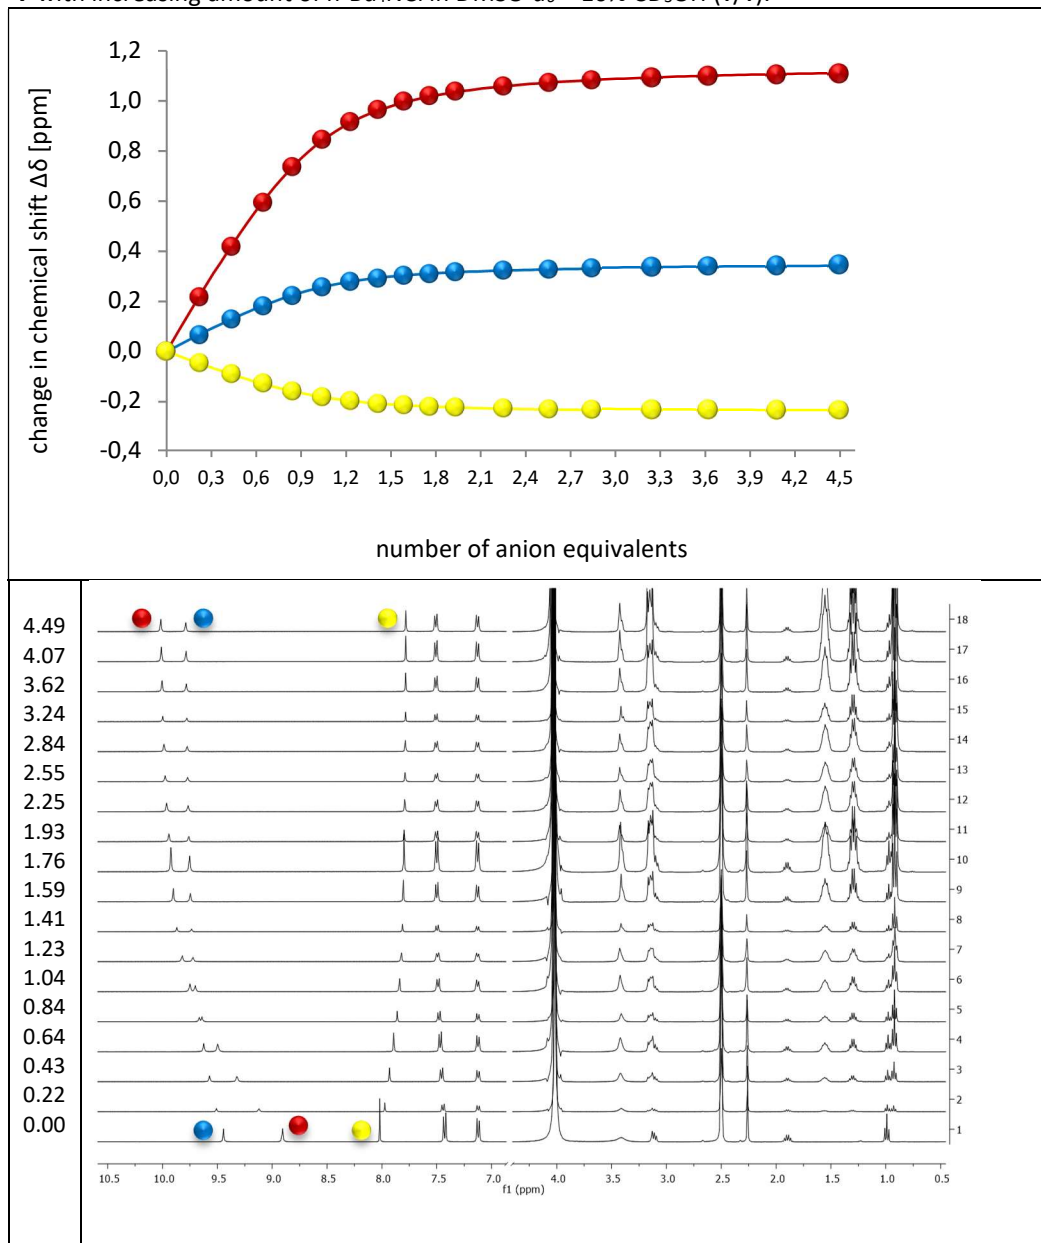

**Table S24.** Corresponding experimental chemical shift changes (symbols) and calculated binding isotherms (lines) assuming 1:1 binding model; Stacked plots from  $^1\text{H}$  NMR titrations of Receptor **7** with increasing amount of  $n\text{-Bu}_4\text{NCO}_2\text{Me}$  in  $\text{DMSO-}d_6 + 10\% \text{CD}_3\text{OH}$  (v/v).

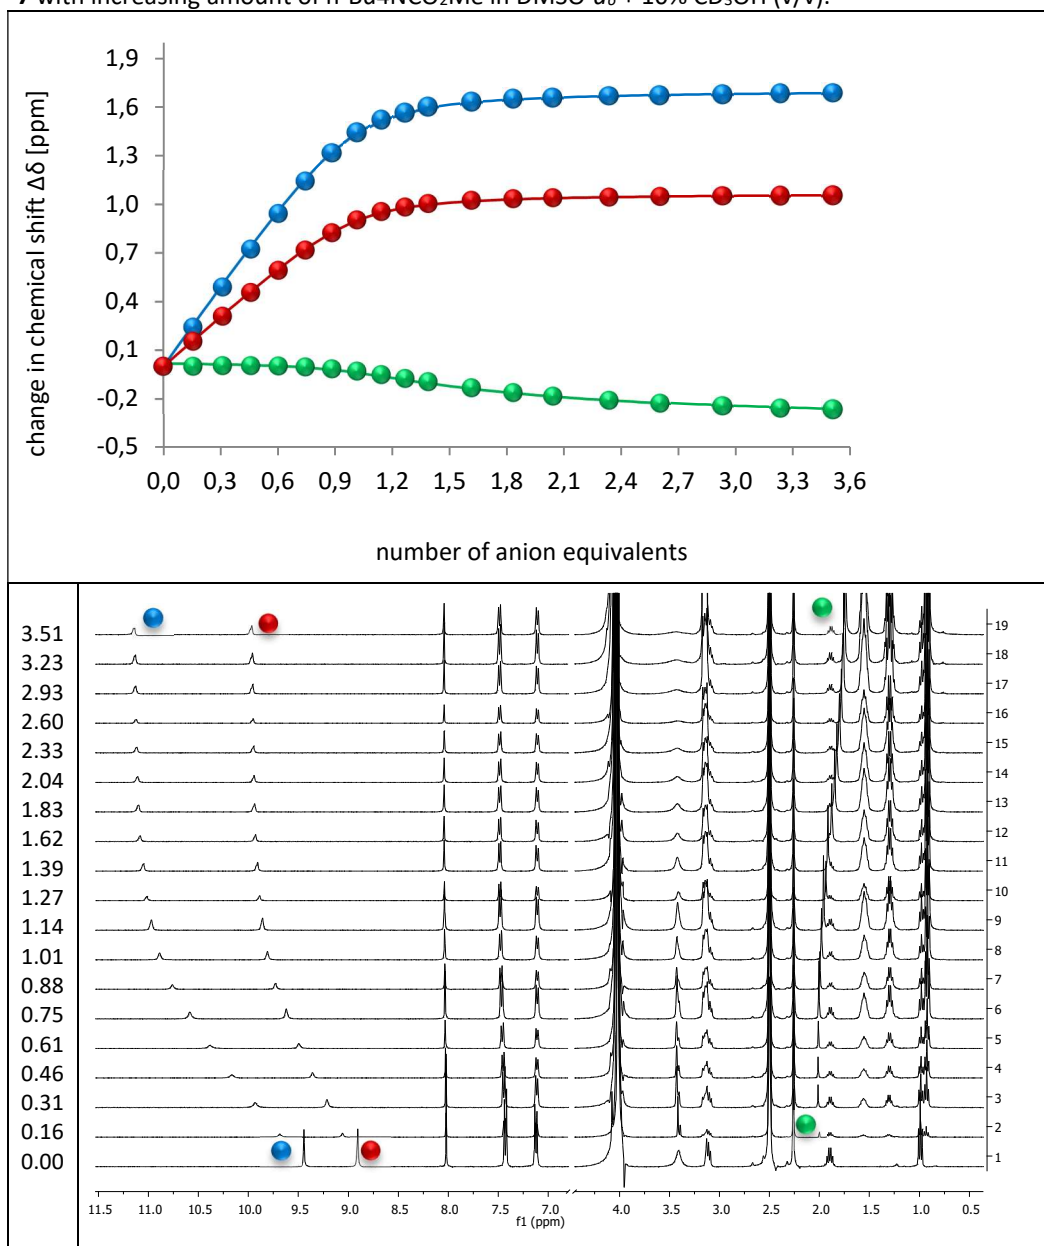

**Table S25.** Corresponding experimental chemical shift changes (symbols) and calculated binding isotherms (lines) assuming 1:1 binding model; Stacked plots from  $^1\text{H}$  NMR titrations of Receptor **7** with increasing amount of  $n\text{-Bu}_4\text{NH}_2\text{PO}_4$  in  $\text{DMSO-}d_6 + 10\% \text{CD}_3\text{OH}$  (v/v).

Fitting failed due to a complex binding model

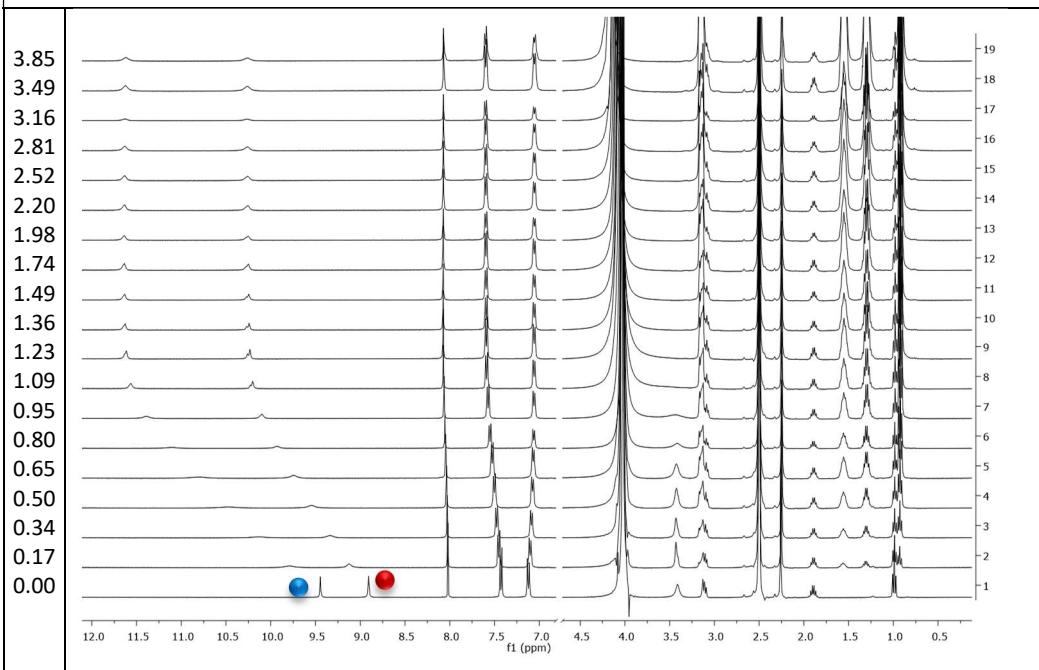

## 6. Cartesian coordinates of calculated structures

**Table S26.** Cartesian coordinates of the studied structures; all values in Hartrees (@298.15K); energies for Cl<sup>-</sup>, MeCO<sub>2</sub><sup>-</sup>, and PhCO<sub>2</sub><sup>-</sup> are -460.351275, -228.487930, and -420.111546, respectively.

| Receptor 2<br>$\Delta G^0 = -2076.65198$ au |           |           |           | Receptor 3<br>$\Delta G^0 = -2224.28751$ au |           |           |           | Receptor 4<br>$\Delta G^0 = -2633.15986$ au |           |           |           |
|---------------------------------------------|-----------|-----------|-----------|---------------------------------------------|-----------|-----------|-----------|---------------------------------------------|-----------|-----------|-----------|
| C                                           | -0.104806 | -0.001085 | -4.315002 | C                                           | -0.405838 | 0.425268  | -4.177602 | C                                           | -0.417267 | 0.468169  | -4.602083 |
| N                                           | -0.610128 | -0.000846 | -1.471477 | N                                           | -0.261372 | 0.157942  | -1.305093 | N                                           | -0.274284 | 0.198180  | -1.728911 |
| C                                           | -0.236170 | -1.172094 | -3.567365 | C                                           | -0.590361 | -0.791121 | -3.517794 | C                                           | -0.617221 | -0.745640 | -3.942211 |
| C                                           | -0.237881 | 1.170016  | -3.567763 | C                                           | -0.141844 | 1.500615  | -3.327276 | C                                           | -0.139353 | 1.539526  | -3.751417 |
| C                                           | -0.485842 | 1.126143  | -2.174801 | C                                           | -0.081307 | 1.325771  | -1.924230 | C                                           | -0.081079 | 1.363586  | -2.348371 |
| C                                           | -0.483943 | -1.127906 | -2.174349 | C                                           | -0.510464 | -0.878063 | -2.107576 | C                                           | -0.536355 | -0.833901 | -2.532244 |
| S                                           | -0.137609 | -2.816578 | -4.136557 | S                                           | -0.927226 | -2.350001 | -4.223462 | S                                           | -0.975459 | -2.299301 | -4.648245 |
| S                                           | -0.140964 | 2.814323  | -4.137688 | S                                           | 0.150152  | 3.163883  | -3.763890 | S                                           | 0.173913  | 3.198937  | -4.188186 |
| C                                           | -0.425619 | -3.433696 | -2.521103 | C                                           | -0.962985 | -3.103045 | -2.641586 | C                                           | -1.017262 | -3.053142 | -3.068440 |
| H                                           | -0.455766 | -4.501137 | -2.367338 | H                                           | -1.154322 | -4.162737 | -2.572380 | H                                           | -1.221316 | -4.110609 | -3.000061 |
| C                                           | -0.589869 | -2.454721 | -1.593073 | C                                           | -0.730132 | -2.230246 | -1.626991 | C                                           | -0.770649 | -2.183779 | -2.054561 |
| C                                           | -0.430612 | 3.431788  | -2.522665 | C                                           | 0.345269  | 3.613234  | -2.082133 | C                                           | 0.372741  | 3.646334  | -2.507899 |
| H                                           | -0.462152 | 4.499245  | -2.369268 | H                                           | 0.559068  | 4.642350  | -1.839052 | H                                           | 0.597945  | 4.673183  | -2.265148 |
| C                                           | -0.594038 | 2.453033  | -1.594268 | C                                           | 0.199229  | 2.567770  | -1.227244 | C                                           | 0.213075  | 2.602816  | -1.653505 |
| C                                           | 0.214845  | -0.000545 | -5.782163 | C                                           | -0.425338 | 0.553377  | -5.673714 | C                                           | -0.433186 | 0.595392  | -6.098086 |
| H                                           | -0.234790 | 0.880727  | -6.256570 | H                                           | -0.791078 | 1.548908  | -5.954405 | H                                           | -0.782352 | 1.596301  | -6.380669 |
| H                                           | -0.231725 | -0.882921 | -6.257295 | H                                           | -1.127291 | -0.175686 | -6.097268 | H                                           | -1.145846 | -0.123007 | -6.521877 |
| C                                           | 1.732623  | 0.002489  | -6.033176 | C                                           | 0.970180  | 0.332412  | -6.282760 | C                                           | 0.960118  | 0.350291  | -6.702747 |
| H                                           | 2.176688  | -0.880776 | -5.558067 | H                                           | 1.332138  | -0.663271 | -5.999144 | H                                           | 1.306056  | -0.649285 | -6.412609 |
| H                                           | 2.174438  | 0.881903  | -5.548917 | H                                           | 1.668771  | 1.060779  | -5.853368 | H                                           | 1.668543  | 1.070194  | -6.275242 |
| C                                           | 2.051049  | 0.010921  | -7.525701 | C                                           | 0.941741  | 0.466597  | -7.802891 | C                                           | 0.937993  | 0.476287  | -8.223582 |
| H                                           | 3.131731  | 0.011192  | -7.697606 | H                                           | 1.936546  | 0.309924  | -8.230649 | H                                           | 1.931523  | 0.300684  | -8.646902 |
| H                                           | 1.630052  | 0.900409  | -8.007417 | H                                           | 0.598042  | 1.464149  | -8.098232 | H                                           | 0.611816  | 1.477550  | -8.526014 |
| H                                           | 1.628726  | -0.871938 | -8.018308 | H                                           | 0.261548  | -0.269477 | -8.245524 | H                                           | 0.247348  | -0.251315 | -8.663926 |
| N                                           | -0.832528 | -2.542716 | -0.227663 | N                                           | -0.671221 | -2.440204 | -0.253117 | N                                           | -0.706930 | -2.399144 | -0.680152 |
| H                                           | -0.927547 | -1.651740 | 0.251053  | H                                           | -0.489866 | -1.606020 | 0.298741  | H                                           | -0.506305 | -1.569824 | -0.127136 |
| N                                           | -0.838917 | 2.541645  | -0.229218 | N                                           | 0.275917  | 2.521360  | 0.160801  | N                                           | 0.285324  | 2.559916  | -0.263338 |
| H                                           | -0.933473 | 1.650984  | 0.250197  | H                                           | 0.123325  | 1.602021  | 0.565998  | H                                           | 0.119344  | 1.643820  | 0.145062  |
| C                                           | -1.003884 | -3.718346 | 0.472045  | C                                           | -0.820839 | -3.662586 | 0.358348  | C                                           | -0.862129 | -3.619182 | -0.078673 |
| C                                           | -1.003494 | 3.717955  | 0.471091  | C                                           | 0.512470  | 3.609975  | 0.966931  | C                                           | 0.524898  | 3.647698  | 0.533092  |
| O                                           | -0.931359 | -4.819932 | -0.080576 | O                                           | -1.047958 | -4.687195 | -0.281525 | O                                           | -1.111344 | -4.640049 | -0.710325 |
| O                                           | -0.923790 | 4.819390  | -0.080862 | O                                           | 0.698379  | 4.733603  | 0.504821  | O                                           | 0.725186  | 4.768134  | 0.077229  |
| C                                           | -1.317703 | -4.712863 | 2.687262  | C                                           | -0.778182 | -4.676277 | 2.639961  | C                                           | -0.791268 | -4.634529 | 2.193595  |
| H                                           | -1.912765 | -4.426502 | 3.559600  | C                                           | -0.917433 | -6.666800 | 4.619477  | C                                           | -0.913104 | -6.615970 | 4.131667  |
| H                                           | -1.847947 | -5.520413 | 2.174142  | C                                           | -1.143654 | -5.984710 | 2.295511  | C                                           | -1.146302 | -5.947719 | 1.835054  |
| C                                           | 0.068233  | -5.185037 | 3.123147  | C                                           | -0.485375 | -4.374899 | 3.979750  | C                                           | -0.502502 | -4.338443 | 3.541157  |
| H                                           | 0.582444  | -4.361638 | 3.637072  | C                                           | -0.556185 | -5.360737 | 4.957182  | C                                           | -0.560968 | -5.321025 | 4.510718  |
| H                                           | 0.659180  | -5.428007 | 2.230155  | C                                           | -1.207453 | -6.963309 | 3.289470  | C                                           | -1.205577 | -6.934352 | 2.809268  |
| C                                           | -0.004407 | -6.402862 | 4.042544  | H                                           | -1.374574 | -6.234258 | 1.269894  | H                                           | -1.372737 | -6.192354 | 0.808155  |
| H                                           | -0.615964 | -6.157381 | 4.921004  | H                                           | -0.202192 | -3.360358 | 4.250411  | H                                           | -0.228960 | -3.325074 | 3.820853  |
| H                                           | -0.520823 | -7.218794 | 3.519960  | H                                           | -0.325782 | -5.104152 | 5.987255  | H                                           | -0.336404 | -5.090984 | 5.545570  |
| C                                           | 1.377336  | -6.873719 | 4.493075  | H                                           | -1.492086 | -7.973483 | 3.007973  | H                                           | -1.478639 | -7.948017 | 2.539796  |
| H                                           | 1.898908  | -6.080254 | 5.040161  | H                                           | -0.972755 | -7.438147 | 5.381579  | C                                           | 0.710513  | 4.227764  | 2.946938  |
| H                                           | 1.994836  | -7.146950 | 3.629990  | C                                           | 0.720372  | 4.187815  | 3.387222  | C                                           | 1.064034  | 5.820552  | 5.191230  |
| H                                           | 1.308811  | -7.747265 | 5.149131  | C                                           | 1.097403  | 5.780008  | 5.672458  | C                                           | 0.589692  | 3.681469  | 4.240736  |



|   |           |           |          |   |           |           |          |   |           |           |          |
|---|-----------|-----------|----------|---|-----------|-----------|----------|---|-----------|-----------|----------|
| C | -1.314143 | 4.713756  | 2.686175 | C | 0.603979  | 3.634396  | 4.672417 | C | 1.017521  | 5.592671  | 2.799211 |
| H | -1.908013 | 4.428764  | 3.559756 | C | 1.029884  | 5.548041  | 3.251935 | C | 1.192546  | 6.383967  | 3.925662 |
| H | -1.843410 | 5.522743  | 2.174273 | C | 1.213444  | 6.326554  | 4.396306 | C | 0.764469  | 4.469375  | 5.362013 |
| C | 0.073813  | 5.182576  | 3.119338 | C | 0.791566  | 4.423450  | 5.801008 | H | 0.354513  | 2.627364  | 4.357804 |
| H | 0.587095  | 4.357858  | 3.632057 | H | 0.364968  | 2.578855  | 4.780185 | H | 1.117373  | 6.028072  | 1.816322 |
| H | 0.663543  | 5.424363  | 2.225259 | H | 1.126093  | 5.990715  | 2.270944 | H | 1.428333  | 7.436487  | 3.818593 |
| C | 0.005772  | 6.400418  | 4.039010 | H | 1.452327  | 7.379818  | 4.276572 | H | 0.669006  | 4.046553  | 6.355242 |
| H | -0.604664 | 6.156137  | 4.918596 | H | 0.696040  | 3.973136  | 6.784910 | N | -0.707579 | -3.576231 | 1.294015 |
| H | -0.509757 | 7.217639  | 3.517556 | H | 1.243089  | 6.398021  | 6.553205 | H | -0.472135 | -2.678299 | 1.704479 |
| C | 1.389635  | 6.867827  | 4.486716 | N | -0.691806 | -3.611948 | 1.723065 | N | 0.515602  | 3.352050  | 1.883061 |
| H | 1.910187  | 6.073136  | 5.032954 | H | -0.470651 | -2.711221 | 2.133832 | H | 0.315396  | 2.392293  | 2.145019 |
| H | 1.324732  | 7.741768  | 5.142624 | N | 0.518527  | 3.310330  | 2.305399 | N | 1.244242  | 6.660097  | 6.363707 |
| H | 2.006027  | 7.139084  | 3.622220 | H | 0.327103  | 2.348875  | 2.565344 | O | 1.121711  | 6.148774  | 7.469132 |
| N | -1.282569 | -3.563773 | 1.793342 |   |           |           |          | O | 1.508839  | 7.843304  | 6.197701 |
| H | -1.179720 | -2.647163 | 2.211972 |   |           |           |          | N | -0.975210 | -7.657694 | 5.143227 |
| N | -1.283484 | 3.564487  | 1.792251 |   |           |           |          | O | -1.297133 | -8.786686 | 4.797806 |
| H | -1.188430 | 2.646879  | 2.210529 |   |           |           |          | O | -0.702757 | -7.362234 | 6.299444 |

| Receptor 5<br>$\Delta G^0 = -2898.17201$ au |           |           |           | Receptor 6<br>$\Delta G^0 = -2422.71753$ au |           |           |           | Receptor 7<br>$\Delta G^0 = -2302.83125$ au |           |           |           |
|---------------------------------------------|-----------|-----------|-----------|---------------------------------------------|-----------|-----------|-----------|---------------------------------------------|-----------|-----------|-----------|
| C                                           | -0.420198 | 0.480790  | -4.803589 | C                                           | -0.413275 | 0.427067  | -4.179725 | C                                           | -0.420548 | 0.478890  | -4.810129 |
| N                                           | -0.295492 | 0.217532  | -1.929363 | N                                           | -0.262611 | 0.157004  | -1.307990 | N                                           | -0.285943 | 0.214346  | -1.937448 |
| C                                           | -0.607067 | -0.734831 | -4.143314 | C                                           | -0.569210 | -0.794527 | -3.522433 | C                                           | -0.610460 | -0.736305 | -4.149856 |
| C                                           | -0.164899 | 1.557678  | -3.952834 | C                                           | -0.175699 | 1.506844  | -3.327412 | C                                           | -0.157392 | 1.554666  | -3.960296 |
| C                                           | -0.113967 | 1.384817  | -2.549083 | C                                           | -0.110359 | 1.330103  | -1.924637 | C                                           | -0.101236 | 1.381205  | -2.556982 |
| C                                           | -0.536765 | -0.819751 | -2.732579 | C                                           | -0.487939 | -0.882616 | -2.112685 | C                                           | -0.535231 | -0.821819 | -2.739543 |
| S                                           | -0.935180 | -2.295030 | -4.850020 | S                                           | -0.869350 | -2.359156 | -4.232249 | S                                           | -0.946541 | -2.295423 | -4.855042 |
| S                                           | 0.126759  | 3.220595  | -4.390262 | S                                           | 0.074041  | 3.177137  | -3.760402 | S                                           | 0.139563  | 3.216654  | -4.397632 |
| C                                           | -0.980328 | -3.046559 | -3.268493 | C                                           | -0.888237 | -3.116330 | -2.652215 | C                                           | -0.987317 | -3.047124 | -3.272371 |
| H                                           | -1.169602 | -4.106702 | -3.199877 | H                                           | -1.055545 | -4.180279 | -2.585742 | H                                           | -1.180686 | -4.106461 | -3.203053 |
| C                                           | -0.756124 | -2.172148 | -2.253562 | C                                           | -0.676980 | -2.240664 | -1.635550 | C                                           | -0.756016 | -2.173636 | -2.258193 |
| C                                           | 0.309371  | 3.673091  | -2.708821 | C                                           | 0.261954  | 3.627230  | -2.078331 | C                                           | 0.329650  | 3.667606  | -2.715643 |
| H                                           | 0.519732  | 4.703093  | -2.466267 | H                                           | 0.452196  | 4.660646  | -1.833521 | H                                           | 0.544921  | 4.696472  | -2.473177 |
| C                                           | 0.159456  | 2.628763  | -1.853416 | C                                           | 0.142719  | 2.576811  | -1.225462 | C                                           | 0.179049  | 2.623440  | -1.859904 |
| C                                           | -0.426226 | 0.604358  | -6.300004 | C                                           | -0.430513 | 0.552652  | -5.675815 | C                                           | -0.430118 | 0.603956  | -6.306438 |
| H                                           | -0.784611 | 1.600399  | -6.588082 | H                                           | -0.806359 | 1.542880  | -5.961441 | H                                           | -0.798693 | 1.596839  | -6.592922 |
| H                                           | -1.127457 | -0.123305 | -6.727165 | H                                           | -1.122370 | -0.186099 | -6.099363 | H                                           | -1.124368 | -0.130098 | -6.733751 |
| C                                           | 0.974188  | 0.373547  | -6.893789 | C                                           | 0.970039  | 0.343498  | -6.277228 | C                                           | 0.971908  | 0.387354  | -6.901988 |
| H                                           | 1.329334  | -0.621250 | -6.598395 | H                                           | 1.341924  | -0.645606 | -5.983127 | H                                           | 1.335773  | -0.604954 | -6.608748 |
| H                                           | 1.671099  | 1.102677  | -6.462940 | H                                           | 1.657976  | 1.083261  | -5.850181 | H                                           | 1.663083  | 1.121407  | -6.470437 |
| C                                           | 0.961756  | 0.495115  | -8.415101 | C                                           | 0.947810  | 0.463646  | -7.798465 | C                                           | 0.957471  | 0.512030  | -8.422965 |
| H                                           | 1.959980  | 0.328479  | -8.830987 | H                                           | 1.946235  | 0.311888  | -8.219434 | H                                           | 1.956852  | 0.355033  | -8.839761 |
| H                                           | 0.627439  | 1.492091  | -8.722781 | H                                           | 0.596702  | 1.455072  | -8.105342 | H                                           | 0.614416  | 1.506787  | -8.728165 |
| H                                           | 0.281730  | -0.240806 | -8.858221 | H                                           | 0.276774  | -0.282945 | -8.237386 | H                                           | 0.283518  | -0.228535 | -8.867399 |
| N                                           | -0.703412 | -2.383045 | -0.878688 | N                                           | -0.614260 | -2.452033 | -0.262091 | N                                           | -0.698679 | -2.381855 | -0.884425 |
| H                                           | -0.520738 | -1.549787 | -0.325568 | H                                           | -0.447777 | -1.615654 | 0.291306  | H                                           | -0.504443 | -1.549340 | -0.334752 |
| N                                           | 0.226767  | 2.587406  | -0.463673 | N                                           | 0.224993  | 2.529700  | 0.162347  | N                                           | 0.252126  | 2.577689  | -0.471752 |
| H                                           | 0.071800  | 1.669568  | -0.055424 | H                                           | 0.100380  | 1.605737  | 0.566477  | H                                           | 0.086109  | 1.660975  | -0.065940 |
| C                                           | -0.851404 | -3.604709 | -0.272602 | C                                           | -0.770298 | -3.673116 | 0.349057  | C                                           | -0.842499 | -3.605086 | -0.271331 |
| C                                           | 0.466719  | 3.676614  | 0.335356  | C                                           | 0.465059  | 3.617812  | 0.967264  | C                                           | 0.481927  | 3.667637  | 0.336289  |
| O                                           | -1.080352 | -4.629235 | -0.908900 | O                                           | -0.993554 | -4.698908 | -0.290382 | O                                           | -1.079918 | -4.628068 | -0.910720 |
| O                                           | 0.660668  | 4.797650  | -0.125591 | O                                           | 0.631389  | 4.745140  | 0.506672  | O                                           | 0.673855  | 4.790448  | -0.126394 |
| C                                           | -0.801223 | -4.620380 | 2.002748  | C                                           | -0.764162 | -4.686455 | 2.628493  | C                                           | -0.788280 | -4.621234 | 2.009039  |
| C                                           | -0.939559 | -6.613572 | 3.959725  | C                                           | -0.968158 | -6.648481 | 4.574911  | C                                           | -0.927533 | -6.626928 | 4.004219  |
| C                                           | -1.162740 | -5.928951 | 1.648878  | C                                           | -1.160250 | -5.984343 | 2.278562  | C                                           | -1.139334 | -5.934003 | 1.668092  |
| C                                           | -0.512248 | -4.325895 | 3.346927  | C                                           | -0.471389 | -4.396001 | 3.970176  | C                                           | -0.512984 | -4.321345 | 3.350528  |
| C                                           | -0.579465 | -5.312630 | 4.317201  | C                                           | -0.573583 | -5.374473 | 4.951931  | C                                           | -0.584763 | -5.309337 | 4.326367  |
| C                                           | -1.226137 | -6.913950 | 2.630614  | C                                           | -1.260319 | -6.969605 | 3.262053  | C                                           | -1.203432 | -6.909132 | 2.663953  |
| H                                           | -1.393641 | -6.174508 | 0.622888  | H                                           | -1.390497 | -6.227894 | 1.251561  | H                                           | -1.362246 | -6.191114 | 0.642365  |
| H                                           | -0.235317 | -3.313114 | 3.627128  | H                                           | -0.163227 | -3.391544 | 4.248839  | H                                           | -0.244398 | -3.304773 | 3.628877  |
| H                                           | -0.353674 | -5.066285 | 5.350383  | H                                           | -0.350859 | -5.153972 | 5.990918  | H                                           | -0.369044 | -5.047177 | 5.359707  |
| H                                           | -1.508713 | -7.923223 | 2.346461  | H                                           | -1.566939 | -7.978782 | 3.005252  | H                                           | -1.480965 | -7.922190 | 2.379602  |
| C                                           | 0.675225  | 4.261447  | 2.748904  | C                                           | 0.715861  | 4.197007  | 3.380542  | C                                           | 0.674590  | 4.250774  | 2.756460  |
| C                                           | 1.065150  | 5.862202  | 5.008912  | C                                           | 1.132688  | 5.774351  | 5.620955  | C                                           | 1.054812  | 5.855955  | 5.059100  |
| C                                           | 0.573193  | 3.713710  | 4.041176  | C                                           | 0.609763  | 3.651467  | 4.669545  | C                                           | 0.560553  | 3.702839  | 4.042507  |
| C                                           | 0.977043  | 5.622634  | 2.602890  | C                                           | 1.036259  | 5.553578  | 3.234788  | C                                           | 0.977368  | 5.611870  | 2.626688  |
| C                                           | 1.170307  | 6.411162  | 3.735385  | C                                           | 1.243966  | 6.344092  | 4.365993  | C                                           | 1.160042  | 6.387974  | 3.772331  |
| C                                           | 0.767115  | 4.504989  | 5.159918  | C                                           | 0.818809  | 4.435851  | 5.797201  | C                                           | 0.747499  | 4.494830  | 5.168943  |
| H                                           | 0.338402  | 2.659307  | 4.160292  | H                                           | 0.361911  | 2.600000  | 4.790103  | H                                           | 0.320010  | 2.648145  | 4.156475  |
| H                                           | 1.060296  | 6.062610  | 1.620133  | H                                           | 1.124614  | 5.992428  | 2.251525  | H                                           | 1.066277  | 6.061490  | 1.647992  |

|   |           |           |          |   |           |           |          |   |           |           |          |
|---|-----------|-----------|----------|---|-----------|-----------|----------|---|-----------|-----------|----------|
| H | 1.403168  | 7.463741  | 3.609002 | H | 1.492688  | 7.396172  | 4.267720 | H | 1.390685  | 7.444356  | 3.650361 |
| H | 0.683650  | 4.066354  | 6.150517 | H | 0.738726  | 4.018139  | 6.795687 | H | 0.649094  | 4.043319  | 6.153677 |
| N | -0.716498 | -3.557065 | 1.096878 | N | -0.651632 | -3.622114 | 1.714206 | N | -0.699165 | -3.556536 | 1.090335 |
| H | -0.490991 | -2.657723 | 1.508927 | H | -0.429456 | -2.723058 | 2.127642 | H | -0.479940 | -2.655548 | 1.501339 |
| N | 0.465562  | 3.382270  | 1.680343 | N | 0.497556  | 3.315952  | 2.304451 | N | 0.471172  | 3.371692  | 1.673843 |
| H | 0.272166  | 2.422140  | 1.944734 | H | 0.317719  | 2.353373  | 2.568293 | H | 0.279400  | 2.410595  | 1.934615 |
| C | -0.960818 | -7.690954 | 4.996271 | F | -1.075615 | -7.609780 | 5.527483 | C | -0.976270 | -7.706711 | 5.055853 |
| C | 1.297074  | 6.690295  | 6.232043 | F | 1.339671  | 6.547898  | 6.716658 | H | -0.061364 | -8.310376 | 5.040593 |
| F | -1.327125 | -7.231961 | 6.209491 |   |           |           |          | H | -1.818607 | -8.384643 | 4.887279 |
| F | 0.254030  | -8.265975 | 5.168513 |   |           |           |          | H | -1.074236 | -7.276850 | 6.056698 |
| F | -1.805241 | -8.692741 | 4.684587 |   |           |           |          | C | 1.290015  | 6.706701  | 6.281722 |
| F | 2.449337  | 6.363662  | 6.863165 |   |           |           |          | H | 2.350687  | 6.708820  | 6.558932 |
| F | 0.319970  | 6.528492  | 7.151154 |   |           |           |          | H | 0.725822  | 6.329141  | 7.139513 |
| F | 1.368723  | 8.006808  | 5.967847 |   |           |           |          | H | 0.994402  | 7.744665  | 6.102861 |

| Anion complex 2@Cl <sup>-</sup><br>$\Delta G^0 = -2537.01404$ au |           |           |           | Anion complex 3@Cl <sup>-</sup><br>$\Delta G^0 = -2684.65076$ au |           |           |           | Anion complex 4@Cl <sup>-</sup><br>$\Delta G^0 = -3093.52609$ au |           |           |           |
|------------------------------------------------------------------|-----------|-----------|-----------|------------------------------------------------------------------|-----------|-----------|-----------|------------------------------------------------------------------|-----------|-----------|-----------|
| C                                                                | -0.205518 | 0.004661  | -4.465160 | C                                                                | -0.404673 | 0.011450  | -4.318619 | C                                                                | -0.367869 | 0.007425  | -4.764501 |
| N                                                                | -0.659027 | -0.018595 | -1.618240 | N                                                                | -0.263329 | 0.007144  | -1.437639 | N                                                                | -0.246885 | 0.006166  | -1.881835 |
| C                                                                | -0.339221 | -1.174769 | -3.727467 | C                                                                | -0.373248 | -1.163340 | -3.561158 | C                                                                | -0.335507 | -1.166654 | -4.005303 |
| C                                                                | -0.308298 | 1.171803  | -3.703088 | C                                                                | -0.359973 | 1.183985  | -3.558378 | C                                                                | -0.336173 | 1.180852  | -4.004398 |
| C                                                                | -0.530683 | 1.111197  | -2.308710 | C                                                                | -0.291358 | 1.131972  | -2.147587 | C                                                                | -0.276887 | 1.129269  | -2.593594 |
| C                                                                | -0.560478 | -1.137027 | -2.331826 | C                                                                | -0.303224 | -1.115407 | -2.150571 | C                                                                | -0.276036 | -1.116408 | -2.594389 |
| S                                                                | -0.268930 | -2.824136 | -4.293552 | S                                                                | -0.405835 | -2.818919 | -4.117210 | S                                                                | -0.359540 | -2.824044 | -4.556940 |
| S                                                                | -0.197480 | 2.830073  | -4.236043 | S                                                                | -0.374818 | 2.840995  | -4.109810 | S                                                                | -0.360722 | 2.838874  | -4.554396 |
| C                                                                | -0.530875 | -3.439362 | -2.667334 | C                                                                | -0.327937 | -3.420953 | -2.468295 | C                                                                | -0.292234 | -3.422512 | -2.907648 |
| H                                                                | -0.563576 | -4.507023 | -2.512342 | H                                                                | -0.323459 | -4.487528 | -2.301585 | H                                                                | -0.287136 | -4.488964 | -2.738914 |
| C                                                                | -0.669275 | -2.456182 | -1.739852 | C                                                                | -0.280027 | -2.429877 | -1.541098 | C                                                                | -0.253242 | -2.429052 | -1.983449 |
| C                                                                | -0.445357 | 3.418564  | -2.597866 | C                                                                | -0.292317 | 3.438134  | -2.459644 | C                                                                | -0.293857 | 3.435724  | -2.904323 |
| H                                                                | -0.453959 | 4.483455  | -2.421896 | H                                                                | -0.277599 | 4.504234  | -2.290369 | H                                                                | -0.288653 | 4.502007  | -2.734305 |
| C                                                                | -0.606326 | 2.420548  | -1.690135 | C                                                                | -0.255020 | 2.444531  | -1.534713 | C                                                                | -0.254543 | 2.441222  | -1.981310 |
| C                                                                | 0.092256  | 0.017658  | -5.936870 | C                                                                | -0.413907 | 0.010608  | -5.820156 | C                                                                | -0.369784 | 0.007413  | -6.266058 |
| H                                                                | -0.355338 | 0.908241  | -6.395678 | H                                                                | -0.929139 | 0.906195  | -6.188649 | H                                                                | -0.899786 | 0.893996  | -6.635415 |
| H                                                                | -0.368882 | -0.855794 | -6.414698 | H                                                                | -0.978066 | -0.856627 | -6.185284 | H                                                                | -0.917454 | -0.868923 | -6.634278 |
| C                                                                | 1.606254  | 0.009410  | -6.208221 | C                                                                | 1.013655  | -0.030925 | -6.392317 | C                                                                | 1.059607  | -0.007161 | -6.834640 |
| H                                                                | 2.046923  | -0.886099 | -5.753304 | H                                                                | 1.522137  | -0.928589 | -6.020021 | H                                                                | 1.586503  | -0.892524 | -6.458651 |
| H                                                                | 2.063558  | 0.876023  | -5.715045 | H                                                                | 1.574776  | 0.833503  | -6.016831 | H                                                                | 1.602464  | 0.869954  | -6.461968 |
| C                                                                | 1.905934  | 0.039185  | -7.704239 | C                                                                | 1.004301  | -0.028866 | -7.918565 | C                                                                | 1.052839  | -0.010888 | -8.360855 |
| H                                                                | 2.984217  | 0.026210  | -7.890117 | H                                                                | 2.022297  | -0.063142 | -8.318443 | H                                                                | 2.072086  | -0.023906 | -8.758703 |
| H                                                                | 1.492616  | 0.943207  | -8.165061 | H                                                                | 0.518243  | 0.874776  | -8.302803 | H                                                                | 0.547353  | 0.880119  | -8.749437 |
| H                                                                | 1.463882  | -0.828419 | -8.206548 | H                                                                | 0.457877  | -0.896567 | -8.304704 | H                                                                | 0.526797  | -0.892144 | -8.744299 |
| N                                                                | -0.889240 | -2.508499 | -0.370791 | N                                                                | -0.213416 | -2.467744 | -0.154618 | N                                                                | -0.196121 | -2.463760 | -0.594687 |
| H                                                                | -0.952259 | -1.604553 | 0.104805  | H                                                                | -0.186217 | -1.555027 | 0.308115  | H                                                                | -0.167690 | -1.549702 | -0.132853 |
| N                                                                | -0.820369 | 2.450375  | -0.319538 | N                                                                | -0.189850 | 2.479391  | -0.148107 | N                                                                | -0.196109 | 2.473296  | -0.592581 |
| H                                                                | -0.893014 | 1.538697  | 0.139163  | H                                                                | -0.171801 | 1.566025  | 0.313927  | H                                                                | -0.168098 | 1.558013  | -0.133521 |
| C                                                                | -1.017263 | -3.661643 | 0.372123  | C                                                                | -0.175269 | -3.612310 | 0.603834  | C                                                                | -0.178987 | -3.603032 | 0.161018  |
| C                                                                | -0.950522 | 3.591332  | 0.442247  | C                                                                | -0.155419 | 3.622543  | 0.612746  | C                                                                | -0.182296 | 3.610359  | 0.166455  |
| O                                                                | -0.909726 | -4.783375 | -0.136169 | O                                                                | -0.206099 | -4.735773 | 0.101579  | O                                                                | -0.217616 | -4.729139 | -0.326493 |
| O                                                                | -0.860947 | 4.721928  | -0.050266 | O                                                                | -0.180528 | 4.747156  | 0.112690  | O                                                                | -0.224781 | 4.737769  | -0.317736 |
| C                                                                | -1.259111 | -4.534535 | 2.649322  | C                                                                | -0.035330 | -4.268561 | 3.007701  | C                                                                | -0.074926 | -4.239677 | 2.563493  |
| H                                                                | -1.904463 | -4.251103 | 3.486805  | C                                                                | 0.097459  | -5.942591 | 5.262619  | C                                                                | 0.010401  | -5.892633 | 4.791052  |
| H                                                                | -1.697561 | -5.419090 | 2.177983  | C                                                                | -0.125618 | -5.659370 | 2.856650  | C                                                                | -0.162368 | -5.635838 | 2.407234  |
| C                                                                | 0.148852  | -4.847814 | 3.153437  | C                                                                | 0.120869  | -3.726300 | 4.294315  | C                                                                | 0.053380  | -3.694095 | 3.857960  |
| H                                                                | 0.568858  | -3.946925 | 3.621472  | C                                                                | 0.185441  | -4.555985 | 5.407568  | C                                                                | 0.096544  | -4.511651 | 4.970416  |
| H                                                                | 0.789246  | -5.092858 | 2.295434  | C                                                                | -0.057474 | -6.478487 | 3.985624  | C                                                                | -0.119096 | -6.456762 | 3.524975  |
| C                                                                | 0.157043  | -6.002839 | 4.152695  | H                                                                | -0.248107 | -6.092622 | 1.873937  | H                                                                | -0.263577 | -6.069199 | 1.423140  |
| H                                                                | -0.514085 | -5.762500 | 4.988103  | H                                                                | 0.190657  | -2.647271 | 4.412444  | H                                                                | 0.120067  | -2.616336 | 3.978150  |
| H                                                                | -0.253455 | -6.899741 | 3.670280  | H                                                                | 0.306199  | -4.114312 | 6.392723  | H                                                                | 0.196932  | -4.089793 | 5.963607  |
| C                                                                | 1.556921  | -6.300350 | 4.686685  | H                                                                | -0.129278 | -7.554770 | 3.853840  | H                                                                | -0.186661 | -7.532673 | 3.412674  |
| H                                                                | 1.969161  | -5.425825 | 5.202724  | H                                                                | 0.147704  | -6.592012 | 6.131316  | C                                                                | -0.074277 | 4.238483  | 2.571104  |
| H                                                                | 2.238357  | -6.557454 | 3.867768  | C                                                                | -0.040836 | 4.272409  | 3.020003  | C                                                                | 0.024109  | 5.884092  | 4.803936  |
| H                                                                | 1.547410  | -7.136291 | 5.393325  | C                                                                | 0.057844  | 5.937847  | 5.283315  | C                                                                | 0.065552  | 3.688786  | 3.862797  |
| C                                                                | -1.215709 | 4.438844  | 2.725893  | C                                                                | 0.115395  | 3.726468  | 4.305031  | C                                                                | -0.168929 | 5.634827  | 2.420703  |
| H                                                                | -1.801170 | 4.097494  | 3.585139  | C                                                                | -0.148274 | 5.662719  | 2.874729  | C                                                                | -0.118374 | 6.452116  | 3.540954  |
| H                                                                | -1.743005 | 5.289481  | 2.282885  | C                                                                | -0.096747 | 6.477486  | 4.007813  | C                                                                | 0.114677  | 4.502693  | 4.977757  |
| C                                                                | 0.180763  | 4.865216  | 3.176190  | C                                                                | 0.162846  | 4.551733  | 5.422454  | H                                                                | 0.137309  | 2.610837  | 3.978649  |
| H                                                                | 0.694238  | 4.000737  | 3.618528  | H                                                                | 0.198150  | 2.647877  | 4.418584  | H                                                                | -0.279862 | 6.070983  | 1.438863  |

|    |           |           |          |    |           |           |          |    |           |           |          |
|----|-----------|-----------|----------|----|-----------|-----------|----------|----|-----------|-----------|----------|
| H  | 0.761553  | 5.169506  | 2.295239 | H  | -0.271222 | 6.098966  | 1.893368 | H  | -0.189683 | 7.528292  | 3.432966 |
| C  | 0.131196  | 6.010693  | 4.184997 | H  | -0.181622 | 7.553265  | 3.880307 | H  | 0.224834  | 4.078216  | 5.968824 |
| H  | -0.464143 | 5.701022  | 5.054352 | H  | 0.283869  | 4.107002  | 6.406164 | N  | -0.112650 | -3.333095 | 1.514450 |
| H  | -0.393028 | 6.864554  | 3.735565 | H  | 0.095027  | 6.583722  | 6.155242 | H  | -0.070878 | -2.344904 | 1.778022 |
| C  | 1.522557  | 6.444198  | 4.642946 | N  | -0.100506 | -3.350616 | 1.947467 | N  | -0.112987 | 3.335778  | 1.518931 |
| H  | 2.053034  | 5.610035  | 5.115968 | H  | -0.067349 | -2.365147 | 2.215453 | H  | -0.066229 | 2.346182  | 1.777444 |
| H  | 1.468721  | 7.263923  | 5.366382 | N  | -0.090021 | 3.357894  | 1.956105 | N  | 0.082584  | 6.749506  | 5.968128 |
| H  | 2.123502  | 6.783255  | 3.791604 | H  | -0.056817 | 2.371490  | 2.220998 | O  | 0.202291  | 6.233225  | 7.072164 |
| N  | -1.294771 | -3.447571 | 1.684346 | Cl | -0.093020 | 0.008119  | 2.228510 | O  | 0.012827  | 7.960297  | 5.799793 |
| H  | -1.246813 | -2.490909 | 2.032892 |    |           |           |          | N  | 0.059039  | -6.762055 | 5.952536 |
| N  | -1.204550 | 3.357146  | 1.754546 |    |           |           |          | O  | -0.013891 | -7.971980 | 5.779453 |
| H  | -1.164156 | 2.396349  | 2.091274 |    |           |           |          | O  | 0.173339  | -6.249920 | 7.059050 |
| Cl | -1.054472 | -0.053734 | 2.036936 |    |           |           |          | Cl | -0.059136 | 0.002649  | 1.770782 |

| Anion complex 5@Cl <sup>-</sup><br>$\Delta G^0 = -3358.53642$ au |           |           |           | Anion complex 6@Cl <sup>-</sup><br>$\Delta G^0 = -2883.08076$ au |           |           |           | Anion complex 7@Cl <sup>-</sup><br>$\Delta G^0 = -2763.19463$ au |           |           |           |
|------------------------------------------------------------------|-----------|-----------|-----------|------------------------------------------------------------------|-----------|-----------|-----------|------------------------------------------------------------------|-----------|-----------|-----------|
| C                                                                | -0.555740 | 0.143647  | -4.948201 | C                                                                | -0.380311 | 0.019405  | -4.324972 | C                                                                | -0.391445 | 0.003847  | -4.964834 |
| N                                                                | -0.359662 | 0.062704  | -2.071415 | N                                                                | -0.224127 | 0.012436  | -1.445004 | N                                                                | -0.241672 | 0.007555  | -2.084732 |
| C                                                                | -0.532099 | -1.050899 | -4.221969 | C                                                                | -0.334449 | -1.156223 | -3.569192 | C                                                                | -0.366800 | -1.168793 | -4.203725 |
| C                                                                | -0.475582 | 1.295006  | -4.158740 | C                                                                | -0.341223 | 1.191363  | -3.563542 | C                                                                | -0.334531 | 1.178594  | -4.208589 |
| C                                                                | -0.380352 | 1.205315  | -2.752043 | C                                                                | -0.265196 | 1.137565  | -2.153395 | C                                                                | -0.262079 | 1.130127  | -2.798385 |
| C                                                                | -0.434801 | -1.039843 | -2.811871 | C                                                                | -0.257986 | -1.109581 | -2.158867 | C                                                                | -0.292981 | -1.116948 | -2.793444 |
| S                                                                | -0.610319 | -2.690996 | -4.816685 | S                                                                | -0.359180 | -2.811072 | -4.126510 | S                                                                | -0.413954 | -2.826255 | -4.753070 |
| S                                                                | -0.469535 | 2.966298  | -4.666943 | S                                                                | -0.374737 | 2.849571  | -4.111572 | S                                                                | -0.339909 | 2.834602  | -4.764016 |
| C                                                                | -0.511670 | -3.335488 | -3.185791 | C                                                                | -0.269278 | -3.414504 | -2.478790 | C                                                                | -0.338869 | -3.422715 | -3.101762 |
| H                                                                | -0.525989 | -4.405911 | -3.046035 | H                                                                | -0.257635 | -4.481311 | -2.313734 | H                                                                | -0.344609 | -4.488721 | -2.931576 |
| C                                                                | -0.426261 | -2.369235 | -2.236060 | C                                                                | -0.222980 | -2.424453 | -1.550635 | C                                                                | -0.281367 | -2.428967 | -2.178096 |
| C                                                                | -0.342569 | 3.518672  | -3.004065 | C                                                                | -0.290884 | 3.444093  | -2.460190 | C                                                                | -0.248216 | 3.435319  | -3.114917 |
| H                                                                | -0.302136 | 4.579686  | -2.808529 | H                                                                | -0.286564 | 4.510014  | -2.288973 | H                                                                | -0.225922 | 4.501747  | -2.948307 |
| C                                                                | -0.304932 | 2.500223  | -2.106999 | C                                                                | -0.239452 | 2.448967  | -1.537750 | C                                                                | -0.214298 | 2.443519  | -2.188154 |
| C                                                                | -0.596423 | 0.189368  | -6.448569 | C                                                                | -0.401556 | 0.020818  | -5.826369 | C                                                                | -0.411741 | 0.001777  | -6.466218 |
| H                                                                | -1.134391 | 1.088429  | -6.774349 | H                                                                | -0.922583 | 0.915677  | -6.188375 | H                                                                | -0.950647 | 0.886045  | -6.828626 |
| H                                                                | -1.155350 | -0.673755 | -6.830540 | H                                                                | -0.966919 | -0.847168 | -6.187948 | H                                                                | -0.960068 | -0.877239 | -6.826827 |
| C                                                                | 0.817349  | 0.193198  | -7.054244 | C                                                                | 1.020445  | -0.015542 | -6.411711 | C                                                                | 1.009689  | -0.007235 | -7.053457 |
| H                                                                | 1.350057  | -0.708350 | -6.728313 | H                                                                | 1.536095  | -0.911243 | -6.044532 | H                                                                | 1.542654  | -0.893259 | -6.687521 |
| H                                                                | 1.373853  | 1.052730  | -6.661228 | H                                                                | 1.581982  | 0.850895  | -6.041630 | H                                                                | 1.556067  | 0.869422  | -6.685037 |
| C                                                                | 0.770289  | 0.252741  | -8.578611 | C                                                                | 0.996418  | -0.013301 | -7.937786 | C                                                                | 0.982129  | -0.004534 | -8.579527 |
| H                                                                | 1.778393  | 0.254730  | -9.004193 | H                                                                | 2.010544  | -0.045096 | -8.347537 | H                                                                | 1.995609  | -0.014550 | -8.991968 |
| H                                                                | 0.257002  | 1.160188  | -8.915629 | H                                                                | 0.504331  | 0.889069  | -8.317232 | H                                                                | 0.470127  | 0.887615  | -8.956842 |
| H                                                                | 0.231410  | -0.610434 | -8.984759 | H                                                                | 0.448494  | -0.882362 | -8.318611 | H                                                                | 0.451355  | -0.884347 | -8.959800 |
| N                                                                | -0.333618 | -2.443207 | -0.851587 | N                                                                | -0.149389 | -2.463346 | -0.164280 | N                                                                | -0.217002 | -2.460374 | -0.791264 |
| H                                                                | -0.274368 | -1.543105 | -0.366811 | H                                                                | -0.119550 | -1.551404 | 0.300295  | H                                                                | -0.184011 | -1.545067 | -0.334135 |
| N                                                                | -0.206132 | 2.495096  | -0.720783 | N                                                                | -0.168687 | 2.478798  | -0.151045 | N                                                                | -0.143473 | 2.476965  | -0.802163 |
| H                                                                | -0.198266 | 1.568448  | -0.284859 | H                                                                | -0.133994 | 1.563513  | 0.306446  | H                                                                | -0.139976 | 1.562350  | -0.342689 |
| C                                                                | -0.328893 | -3.603786 | -0.122601 | C                                                                | -0.128564 | -3.607954 | 0.593945  | C                                                                | -0.180540 | -3.602097 | -0.026838 |
| C                                                                | -0.089393 | 3.612200  | 0.064527  | C                                                                | -0.165652 | 3.617381  | 0.616335  | C                                                                | -0.122368 | 3.617762  | -0.035432 |
| O                                                                | -0.406400 | -4.714674 | -0.642831 | O                                                                | -0.170723 | -4.731715 | 0.093110  | O                                                                | -0.203945 | -4.727729 | -0.525737 |
| O                                                                | -0.078396 | 4.751045  | -0.397883 | O                                                                | -0.215981 | 4.744635  | 0.124282  | O                                                                | -0.146631 | 4.744468  | -0.531435 |
| C                                                                | -0.189270 | -4.310304 | 2.262746  | C                                                                | -0.017806 | -4.270165 | 2.995590  | C                                                                | -0.044731 | -4.254541 | 2.376338  |
| C                                                                | -0.089328 | -6.030999 | 4.465829  | C                                                                | 0.059460  | -5.928458 | 5.215582  | C                                                                | 0.084488  | -5.938620 | 4.650627  |
| C                                                                | -0.314952 | -5.696898 | 2.078149  | C                                                                | -0.135526 | -5.658384 | 2.840100  | C                                                                | -0.141933 | -5.643928 | 2.232995  |
| C                                                                | -0.017220 | -3.802387 | 3.562307  | C                                                                | 0.139417  | -3.734829 | 4.284443  | C                                                                | 0.112731  | -3.716130 | 3.663063  |
| C                                                                | 0.030718  | -4.653450 | 4.655289  | C                                                                | 0.177798  | -4.559964 | 5.401923  | C                                                                | 0.173329  | -4.546471 | 4.775273  |
| C                                                                | -0.264354 | -6.543123 | 3.181260  | C                                                                | -0.095052 | -6.489620 | 3.960978  | C                                                                | -0.076509 | -6.459217 | 3.365036  |
| H                                                                | -0.447801 | -6.105576 | 1.086778  | H                                                                | -0.258109 | -6.088707 | 1.856364  | H                                                                | -0.271536 | -6.083202 | 1.253564  |
| H                                                                | 0.082279  | -2.729764 | 3.707204  | H                                                                | 0.231111  | -2.658823 | 4.409631  | H                                                                | 0.183204  | -2.637381 | 3.785250  |
| H                                                                | 0.166861  | -4.242256 | 5.650673  | H                                                                | 0.297592  | -4.150570 | 6.399890  | H                                                                | 0.291766  | -4.101626 | 5.760972  |
| H                                                                | -0.360816 | -7.614655 | 3.029597  | H                                                                | -0.185426 | -7.566190 | 3.855544  | H                                                                | -0.157996 | -7.536233 | 3.233323  |
| C                                                                | 0.176496  | 4.184407  | 2.473568  | C                                                                | -0.078825 | 4.260238  | 3.024179  | C                                                                | -0.065795 | 4.256380  | 2.375088  |
| C                                                                | 0.518547  | 5.776483  | 4.746955  | C                                                                | -0.031098 | 5.901375  | 5.257167  | C                                                                | -0.045258 | 5.929053  | 4.660727  |
| C                                                                | 0.324828  | 3.596749  | 3.744667  | C                                                                | 0.071281  | 3.715707  | 4.309985  | C                                                                | -0.192097 | 3.715194  | 3.664135  |
| C                                                                | 0.197973  | 5.581549  | 2.356485  | C                                                                | -0.204877 | 5.648726  | 2.878336  | C                                                                | 0.071383  | 5.642384  | 2.234486  |
| C                                                                | 0.371386  | 6.365842  | 3.495250  | C                                                                | -0.179346 | 6.471423  | 4.005875  | C                                                                | 0.076811  | 6.452673  | 3.372320  |
| C                                                                | 0.494700  | 4.383926  | 4.869587  | C                                                                | 0.095070  | 4.532385  | 5.434079  | C                                                                | -0.181090 | 4.540062  | 4.781788  |
| H                                                                | 0.305399  | 2.513768  | 3.837061  | H                                                                | 0.169138  | 2.639430  | 4.427720  | H                                                                | -0.303841 | 2.639540  | 3.782230  |
| H                                                                | 0.080677  | 6.049749  | 1.389842  | H                                                                | -0.322462 | 6.085795  | 1.896929  | H                                                                | 0.169580  | 6.083766  | 1.252124  |

|    |           |           |          |    |           |           |          |    |           |           |          |
|----|-----------|-----------|----------|----|-----------|-----------|----------|----|-----------|-----------|----------|
| H  | 0.388004  | 7.446404  | 3.393306 | H  | -0.276138 | 7.548183  | 3.908254 | H  | 0.180280  | 7.527970  | 3.242526 |
| H  | 0.609773  | 3.915209  | 5.843136 | H  | 0.209971  | 4.116494  | 6.429952 | H  | -0.285039 | 4.094122  | 5.768709 |
| N  | -0.227065 | -3.372314 | 1.230168 | N  | -0.056497 | -3.347975 | 1.937547 | N  | -0.107117 | -3.336435 | 1.313818 |
| H  | -0.159170 | -2.392791 | 1.517684 | H  | -0.013249 | -2.363319 | 2.208394 | H  | -0.091668 | -2.349990 | 1.581241 |
| N  | 0.012216  | 3.305510  | 1.402397 | N  | -0.101302 | 3.346750  | 1.958255 | N  | -0.077767 | 3.345231  | 1.305329 |
| H  | 0.001263  | 2.312144  | 1.643991 | H  | -0.050044 | 2.360508  | 2.221531 | H  | -0.086884 | 2.355703  | 1.561821 |
| C  | -0.080738 | -6.962328 | 5.635165 | F  | 0.094672  | -6.743168 | 6.302420 | C  | 0.184808  | -6.838143 | 5.857134 |
| C  | 0.738457  | 6.602243  | 5.973061 | F  | -0.009327 | 6.707738  | 6.350474 | H  | 1.231709  | -7.062022 | 6.093577 |
| F  | 0.495462  | -6.421045 | 6.724902 | Cl | 0.018864  | -0.002506 | 2.214628 | H  | -0.325401 | -7.789914 | 5.682625 |
| F  | 0.577102  | -8.110958 | 5.373555 |    |           |           |          | H  | -0.257199 | -6.365672 | 6.739545 |
| F  | -1.328199 | -7.332152 | 6.013345 |    |           |           |          | C  | -0.008083 | 6.816953  | 5.879565 |
| F  | 0.539606  | 7.915722  | 5.764538 |    |           |           |          | H  | 0.993122  | 6.829179  | 6.326146 |
| F  | -0.077257 | 6.239597  | 6.987448 |    |           |           |          | H  | -0.704407 | 6.464109  | 6.646445 |
| F  | 1.997695  | 6.478529  | 6.456432 |    |           |           |          | H  | -0.269467 | 7.847666  | 5.623512 |
| Cl | -0.098347 | -0.046870 | 1.586231 |    |           |           |          | Cl | -0.109971 | 0.006655  | 1.617788 |

| Anion complex 2@MeCO <sub>2</sub> <sup>-</sup><br>$\Delta G^0 = -2305.15974$ au |           |           |           | Anion complex 3@MeCO <sub>2</sub> <sup>-</sup><br>$\Delta G^0 = -2452.80352$ au |           |           |           | Anion complex 4@MeCO <sub>2</sub> <sup>-</sup><br>$\Delta G^0 = -2861.67536$ au |           |           |           |
|---------------------------------------------------------------------------------|-----------|-----------|-----------|---------------------------------------------------------------------------------|-----------|-----------|-----------|---------------------------------------------------------------------------------|-----------|-----------|-----------|
| C                                                                               | -0.339870 | -0.120307 | -4.617647 | C                                                                               | -0.373303 | 0.016088  | -4.479691 | C                                                                               | -4.833354 | 0.010629  | 0.294817  |
| N                                                                               | -0.119962 | -0.528868 | -1.768956 | N                                                                               | -0.240906 | 0.011714  | -1.592334 | N                                                                               | -1.943946 | 0.007946  | 0.189861  |
| C                                                                               | 0.884545  | -0.265417 | -3.964945 | C                                                                               | -0.349736 | -1.153121 | -3.723895 | C                                                                               | -4.076396 | -1.158078 | 0.273291  |
| C                                                                               | -1.448413 | -0.189966 | -3.773572 | C                                                                               | -0.326133 | 1.182777  | -3.721879 | C                                                                               | -4.074917 | 1.177698  | 0.259064  |
| C                                                                               | -1.298434 | -0.378918 | -2.377883 | C                                                                               | -0.262072 | 1.145641  | -2.304531 | C                                                                               | -2.657268 | 1.140946  | 0.208587  |
| C                                                                               | 0.949907  | -0.477704 | -2.565844 | C                                                                               | -0.282282 | -1.120526 | -2.306689 | C                                                                               | -2.658809 | -1.123931 | 0.220521  |
| S                                                                               | 2.476377  | -0.227014 | -4.673139 | S                                                                               | -0.383325 | -2.779421 | -4.338118 | S                                                                               | -4.687923 | -2.786045 | 0.302882  |
| S                                                                               | -3.129926 | -0.072380 | -4.218498 | S                                                                               | -0.326973 | 2.810970  | -4.332413 | S                                                                               | -4.684309 | 2.806796  | 0.266395  |
| C                                                                               | 3.217105  | -0.514308 | -3.110709 | C                                                                               | -0.306875 | -3.422309 | -2.718024 | C                                                                               | -3.067377 | -3.426623 | 0.243972  |
| H                                                                               | 4.291823  | -0.581198 | -3.048471 | H                                                                               | -0.301405 | -4.491817 | -2.586161 | H                                                                               | -2.934031 | -4.496098 | 0.242393  |
| C                                                                               | 2.318462  | -0.635568 | -2.096723 | C                                                                               | -0.260473 | -2.469428 | -1.746899 | C                                                                               | -2.098626 | -2.471544 | 0.205757  |
| C                                                                               | -3.621506 | -0.256026 | -2.546500 | C                                                                               | -0.244469 | 3.448598  | -2.710275 | C                                                                               | -3.062606 | 3.444314  | 0.203924  |
| H                                                                               | -4.673428 | -0.241969 | -2.308297 | H                                                                               | -0.220904 | 4.517537  | -2.575428 | H                                                                               | -2.927589 | 4.513519  | 0.190120  |
| C                                                                               | -2.578314 | -0.399334 | -1.685469 | C                                                                               | -0.219282 | 2.492608  | -1.741586 | C                                                                               | -2.095202 | 2.487447  | 0.180745  |
| C                                                                               | -0.451968 | 0.152041  | -6.090325 | C                                                                               | -0.375670 | 0.016469  | -5.981347 | C                                                                               | -6.334951 | 0.011126  | 0.289568  |
| H                                                                               | -1.391550 | -0.265721 | -6.472867 | H                                                                               | -0.873324 | 0.921433  | -6.351037 | H                                                                               | -6.705882 | 0.909456  | 0.798299  |
| H                                                                               | 0.363139  | -0.354016 | -6.622754 | H                                                                               | -0.954756 | -0.839241 | -6.350583 | H                                                                               | -6.706567 | -0.851925 | 0.856001  |
| C                                                                               | -0.403150 | 1.658983  | -6.395136 | C                                                                               | 1.053322  | -0.049975 | -6.547557 | C                                                                               | -6.897850 | -0.034840 | -1.141384 |
| H                                                                               | 0.538087  | 2.072128  | -6.012826 | H                                                                               | 1.545671  | -0.954415 | -6.170037 | H                                                                               | -6.521605 | -0.932688 | -1.646481 |
| H                                                                               | -1.214930 | 2.160361  | -5.854129 | H                                                                               | 1.627099  | 0.806483  | -6.172933 | H                                                                               | -6.520920 | 0.829019  | -1.702305 |
| C                                                                               | -0.524455 | 1.931086  | -7.891904 | C                                                                               | 1.050558  | -0.053314 | -8.073546 | C                                                                               | -8.424023 | -0.034951 | -1.140843 |
| H                                                                               | -0.484653 | 3.004449  | -8.101149 | H                                                                               | 2.069774  | -0.101572 | -8.468830 | H                                                                               | -8.818102 | -0.071134 | -2.161002 |
| H                                                                               | -1.472189 | 1.543955  | -8.282031 | H                                                                               | 0.577447  | 0.854874  | -8.463262 | H                                                                               | -8.812422 | 0.868667  | -0.658115 |
| H                                                                               | 0.289908  | 1.447181  | -8.442359 | H                                                                               | 0.495228  | -0.915616 | -8.459017 | H                                                                               | -8.811921 | -0.902490 | -0.595528 |
| N                                                                               | 2.529889  | -0.893688 | -0.749688 | N                                                                               | -0.197174 | -2.649301 | -0.368786 | N                                                                               | -0.717808 | -2.648537 | 0.157557  |
| H                                                                               | 1.702549  | -1.061813 | -0.165171 | H                                                                               | -0.198980 | -1.812990 | 0.226046  | H                                                                               | -0.126729 | -1.808887 | 0.129255  |
| N                                                                               | -2.580039 | -0.542848 | -0.304846 | N                                                                               | -0.159834 | 2.665703  | -0.362630 | N                                                                               | -0.713911 | 2.660910  | 0.137645  |
| H                                                                               | -1.675579 | -0.472667 | 0.177884  | H                                                                               | -0.184592 | 1.826214  | 0.227259  | H                                                                               | -0.125058 | 1.819260  | 0.126473  |
| C                                                                               | 3.774609  | -1.062339 | -0.174246 | C                                                                               | -0.139225 | -3.887920 | 0.237156  | C                                                                               | -0.111786 | -3.880830 | 0.142279  |
| C                                                                               | -3.718654 | -0.638748 | 0.469000  | C                                                                               | -0.114463 | 3.901140  | 0.250501  | C                                                                               | -0.104203 | 3.891333  | 0.124175  |
| O                                                                               | 4.823312  | -0.876652 | -0.807043 | O                                                                               | -0.132815 | -4.939296 | -0.405897 | O                                                                               | -0.739030 | -4.937972 | 0.165303  |
| O                                                                               | -4.851519 | -0.694136 | -0.027312 | O                                                                               | -0.088720 | 4.955242  | -0.387735 | O                                                                               | -0.728751 | 4.950330  | 0.131903  |
| C                                                                               | 4.957269  | -1.561825 | 1.912337  | C                                                                               | -0.024597 | -4.888494 | 2.512850  | C                                                                               | 2.166799  | -4.859305 | 0.081012  |
| H                                                                               | 4.750709  | -2.258832 | 2.730620  | C                                                                               | 0.103322  | -6.870319 | 4.508926  | C                                                                               | 4.142329  | -6.815886 | 0.042677  |
| H                                                                               | 5.741156  | -2.005360 | 1.289603  | C                                                                               | 0.018353  | -6.245074 | 2.158464  | C                                                                               | 1.811756  | -6.222855 | 0.075036  |
| C                                                                               | 5.433553  | -0.222418 | 2.473633  | C                                                                               | -0.003566 | -4.538833 | 3.874773  | C                                                                               | 3.534242  | -4.505367 | 0.065304  |
| H                                                                               | 4.637250  | 0.207872  | 3.096227  | C                                                                               | 0.060388  | -5.518069 | 4.858406  | C                                                                               | 4.519793  | -5.471686 | 0.046412  |
| H                                                                               | 5.602656  | 0.472963  | 1.640664  | C                                                                               | 0.081735  | -7.216774 | 3.159674  | C                                                                               | 2.802395  | -7.193753 | 0.056048  |
| C                                                                               | 6.712636  | -0.365644 | 3.295601  | H                                                                               | 0.003432  | -6.536011 | 1.117887  | H                                                                               | 0.772621  | -6.515664 | 0.085031  |
| H                                                                               | 6.536269  | -1.071891 | 4.117995  | H                                                                               | -0.037048 | -3.487572 | 4.152427  | H                                                                               | 3.810324  | -3.454582 | 0.068910  |
| H                                                                               | 7.497718  | -0.807626 | 2.667636  | H                                                                               | 0.076029  | -5.220861 | 5.903264  | H                                                                               | 5.567101  | -5.193544 | 0.035400  |
| C                                                                               | 7.196220  | 0.969448  | 3.858889  | H                                                                               | 0.114623  | -8.263145 | 2.868073  | H                                                                               | 2.532999  | -8.243622 | 0.051544  |
| H                                                                               | 6.434785  | 1.416653  | 4.508061  | H                                                                               | 0.153772  | -7.637297 | 5.275862  | C                                                                               | 2.178268  | 4.862056  | 0.083221  |
| H                                                                               | 7.405035  | 1.679375  | 3.050509  | C                                                                               | -0.040068 | 4.890415  | 2.532637  | C                                                                               | 4.160254  | 6.812062  | 0.047208  |
| H                                                                               | 8.111799  | 0.848535  | 4.446629  | C                                                                               | 0.068974  | 6.863550  | 4.538419  | C                                                                               | 3.544596  | 4.503520  | 0.074133  |
| C                                                                               | -4.575196 | -0.658026 | 2.760741  | C                                                                               | -0.024887 | 4.534520  | 3.892999  | C                                                                               | 1.827689  | 6.226745  | 0.072577  |
| H                                                                               | -4.209813 | -1.093137 | 3.696490  | C                                                                               | -0.001009 | 6.248919  | 2.184770  | C                                                                               | 2.821526  | 7.194358  | 0.054613  |
| H                                                                               | -5.383678 | -1.297537 | 2.393119  | C                                                                               | 0.053470  | 7.216180  | 3.190668  | C                                                                               | 4.533320  | 5.466627  | 0.056337  |
| C                                                                               | -5.098604 | 0.756334  | 3.009782  | C                                                                               | 0.029360  | 5.509522  | 4.881407  | H                                                                               | 3.817218  | 3.451784  | 0.081628  |
| H                                                                               | -4.277338 | 1.380665  | 3.387462  | H                                                                               | -0.055136 | 3.481830  | 4.165547  | H                                                                               | 0.789452  | 6.522831  | 0.078457  |



|   |           |           |          |   |           |           |          |   |          |           |           |
|---|-----------|-----------|----------|---|-----------|-----------|----------|---|----------|-----------|-----------|
| H | -5.419854 | 1.189790  | 2.053488 | H | -0.012205 | 6.544293  | 1.145416 | H | 2.555620 | 8.245102  | 0.046619  |
| C | -6.260188 | 0.774687  | 4.001281 | H | 0.083613  | 8.264033  | 2.904191 | H | 5.579747 | 5.185065  | 0.049956  |
| H | -5.937705 | 0.316488  | 4.945749 | H | 0.040421  | 5.207635  | 5.924996 | N | 1.266290 | -3.807658 | 0.099686  |
| H | -7.075391 | 0.149679  | 3.613203 | H | 0.112175  | 7.627056  | 5.309270 | H | 1.670250 | -2.862239 | 0.093534  |
| C | -6.777149 | 2.187650  | 4.265690 | N | -0.086347 | -3.822718 | 1.603948 | N | 1.274117 | 3.813653  | 0.102342  |
| H | -5.985601 | 2.819185  | 4.684752 | H | -0.108552 | -2.883828 | 2.015276 | H | 1.674801 | 2.866711  | 0.106708  |
| H | -7.614369 | 2.183278  | 4.971062 | N | -0.095673 | 3.829279  | 1.617924 | N | 5.190559 | 7.832544  | 0.030153  |
| H | -7.121173 | 2.655230  | 3.336069 | H | -0.130168 | 2.887886  | 2.023467 | O | 6.363028 | 7.477119  | 0.024314  |
| N | 3.743633  | -1.455828 | 1.121441 | C | -0.213117 | 0.004910  | 2.594576 | O | 4.848802 | 9.008953  | 0.022244  |
| H | 2.833620  | -1.574227 | 1.568548 | O | -0.227280 | 1.112089  | 1.993638 | N | 5.169137 | -7.839889 | 0.024879  |
| N | -3.481760 | -0.710661 | 1.804566 | O | -0.193097 | -1.108889 | 2.006432 | O | 4.823349 | -9.015137 | 0.022012  |
| H | -2.535609 | -0.498566 | 2.124315 | C | -0.183972 | 0.016278  | 4.115205 | O | 6.342772 | -7.488456 | 0.013937  |
| C | 0.194794  | -0.920645 | 2.237997 | H | -0.604749 | -0.905492 | 4.521921 | C | 2.231633 | 0.003109  | 0.123287  |
| O | -0.676131 | -0.122890 | 1.789949 | H | -0.720168 | 0.883083  | 4.507542 | O | 1.634385 | 1.112478  | 0.109617  |
| O | 0.933645  | -1.648547 | 1.519191 | H | 0.860562  | 0.088669  | 4.439304 | O | 1.637583 | -1.106901 | 0.078813  |
| C | 0.358522  | -0.989061 | 3.751001 |   |           |           |          | C | 3.751044 | 0.008433  | 0.159761  |
| H | 1.065079  | -1.767086 | 4.045112 |   |           |           |          | H | 4.136030 | -0.917931 | 0.590393  |
| H | -0.613523 | -1.176194 | 4.218038 |   |           |           |          | H | 4.121664 | 0.869507  | 0.720008  |
| H | 0.715556  | -0.020413 | 4.116110 |   |           |           |          | H | 4.120376 | 0.088991  | -0.868939 |

| Anion complex 5@MeCO <sub>2</sub> <sup>-</sup><br>$\Delta G^0 = -3126.68875$ au |           |           |           | Anion complex 6@MeCO <sub>2</sub> <sup>-</sup><br>$\Delta G^0 = -2651.23024$ au |           |           |           | Anion complex 7@MeCO <sub>2</sub> <sup>-</sup><br>$\Delta G^0 = -2531.34619$ au |           |           |           |
|---------------------------------------------------------------------------------|-----------|-----------|-----------|---------------------------------------------------------------------------------|-----------|-----------|-----------|---------------------------------------------------------------------------------|-----------|-----------|-----------|
| C                                                                               | 0.304191  | 5.047339  | -0.513036 | C                                                                               | -0.337808 | 0.007427  | -4.489798 | C                                                                               | -5.072786 | 0.007519  | 0.337291  |
| N                                                                               | 0.212561  | 2.172507  | -0.250424 | N                                                                               | -0.250747 | 0.005018  | -1.600732 | N                                                                               | -2.186549 | 0.005166  | 0.228703  |
| C                                                                               | 0.532675  | 4.387859  | 0.694677  | C                                                                               | -0.325199 | -1.161315 | -3.733027 | C                                                                               | -4.314459 | -1.162657 | 0.336346  |
| C                                                                               | 0.023936  | 4.196236  | -1.581780 | C                                                                               | -0.304690 | 1.174674  | -3.731704 | C                                                                               | -4.314152 | 1.176556  | 0.278251  |
| C                                                                               | 0.001131  | 2.789840  | -1.415496 | C                                                                               | -0.263539 | 1.138774  | -2.313661 | C                                                                               | -2.898916 | 1.135020  | 0.237325  |
| C                                                                               | 0.465811  | 2.976049  | 0.785751  | C                                                                               | -0.279113 | -1.127512 | -2.315134 | C                                                                               | -2.899985 | -1.122757 | 0.270496  |
| S                                                                               | 0.910305  | 5.105963  | 2.236659  | S                                                                               | -0.352437 | -2.788897 | -4.345444 | S                                                                               | -4.900678 | -2.802902 | 0.407087  |
| S                                                                               | -0.335326 | 4.645838  | -3.227679 | S                                                                               | -0.299875 | 2.802848  | -4.342736 | S                                                                               | -4.902440 | 2.816104  | 0.242794  |
| C                                                                               | 0.960394  | 3.530775  | 2.998423  | C                                                                               | -0.298933 | -3.429790 | -2.723544 | C                                                                               | -3.266744 | -3.426426 | 0.332051  |
| H                                                                               | 1.172079  | 3.470511  | 4.054408  | H                                                                               | -0.296246 | -4.499111 | -2.590136 | H                                                                               | -3.116221 | -4.494286 | 0.344367  |
| C                                                                               | 0.704327  | 2.506041  | 2.141569  | C                                                                               | -0.264469 | -2.475532 | -1.753516 | C                                                                               | -2.317080 | -2.455847 | 0.258745  |
| C                                                                               | -0.493107 | 2.965489  | -3.689593 | C                                                                               | -0.245005 | 3.441337  | -2.720066 | C                                                                               | -3.267656 | 3.438005  | 0.188553  |
| H                                                                               | -0.728911 | 2.728360  | -4.715063 | H                                                                               | -0.225725 | 4.510345  | -2.585512 | H                                                                               | -3.119157 | 4.505679  | 0.154786  |
| C                                                                               | -0.284909 | 2.098517  | -2.662996 | C                                                                               | -0.233781 | 2.485866  | -1.750608 | C                                                                               | -2.315197 | 2.467363  | 0.200461  |
| C                                                                               | 0.294706  | 6.543941  | -0.636203 | C                                                                               | -0.318094 | 0.008046  | -5.991297 | C                                                                               | -6.574241 | 0.009386  | 0.337420  |
| H                                                                               | 0.624441  | 6.834260  | -1.641583 | H                                                                               | -0.825892 | 0.904789  | -6.367327 | H                                                                               | -6.940661 | 0.900034  | 0.863194  |
| H                                                                               | 1.011539  | 6.977222  | 0.072424  | H                                                                               | -0.877288 | -0.856995 | -6.369036 | H                                                                               | -6.944354 | -0.862662 | 0.890559  |
| C                                                                               | -1.103323 | 7.126767  | -0.367782 | C                                                                               | 1.118925  | -0.033451 | -6.539532 | C                                                                               | -7.145986 | -0.012608 | -1.089976 |
| H                                                                               | -1.427808 | 6.829742  | 0.637042  | H                                                                               | 1.622134  | -0.930153 | -6.158000 | H                                                                               | -6.780046 | -0.906714 | -1.609116 |
| H                                                                               | -1.817026 | 6.688990  | -1.076227 | H                                                                               | 1.673600  | 0.831620  | -6.156372 | H                                                                               | -6.766926 | 0.855447  | -1.642617 |
| C                                                                               | -1.108163 | 8.647921  | -0.491525 | C                                                                               | 1.135150  | -0.033039 | -8.065544 | C                                                                               | -8.672280 | -0.000259 | -1.078686 |
| H                                                                               | -2.104696 | 9.055182  | -0.295721 | H                                                                               | 2.159738  | -0.066826 | -8.448239 | H                                                                               | -9.074204 | -0.023816 | -2.096161 |
| H                                                                               | -0.806639 | 8.957267  | -1.498399 | H                                                                               | 0.654870  | 0.869604  | -8.459168 | H                                                                               | -9.049225 | 0.902100  | -0.584761 |
| H                                                                               | -0.410560 | 9.098267  | 0.223201  | H                                                                               | 0.596158  | -0.901635 | -8.459780 | H                                                                               | -9.063553 | -0.869271 | -0.538278 |
| N                                                                               | 0.625728  | 1.140660  | 2.391885  | N                                                                               | -0.216602 | -2.651126 | -0.374056 | N                                                                               | -0.935941 | -2.572099 | 0.165942  |
| H                                                                               | 0.316301  | 0.539215  | 1.618617  | H                                                                               | -0.206270 | -1.810872 | 0.214935  | H                                                                               | -0.402881 | -1.707531 | 0.013070  |
| N                                                                               | -0.291168 | 0.707595  | -2.664513 | N                                                                               | -0.199540 | 2.659871  | -0.370551 | N                                                                               | -0.930573 | 2.587415  | 0.195728  |
| H                                                                               | 0.039230  | 0.234481  | -1.813451 | H                                                                               | -0.237674 | 1.820836  | 0.219363  | H                                                                               | -0.381186 | 1.732917  | 0.352572  |
| C                                                                               | 0.819617  | 0.570782  | 3.626763  | C                                                                               | -0.167005 | -3.886542 | 0.237975  | C                                                                               | -0.256124 | -3.769860 | 0.185119  |
| C                                                                               | -0.596792 | -0.057885 | -3.762577 | C                                                                               | -0.147059 | 3.894290  | 0.243148  | C                                                                               | -0.261844 | 3.787019  | 0.097604  |
| O                                                                               | 1.169757  | 1.219044  | 4.612429  | O                                                                               | -0.167490 | -4.941755 | -0.399381 | O                                                                               | -0.826393 | -4.850506 | 0.349019  |
| O                                                                               | -0.993616 | 0.422632  | -4.823632 | O                                                                               | -0.095096 | 4.948906  | -0.393185 | O                                                                               | -0.846316 | 4.857869  | -0.080337 |
| C                                                                               | 0.667777  | -1.659802 | 4.710236  | C                                                                               | -0.048103 | -4.881786 | 2.513805  | C                                                                               | 2.069778  | -4.629490 | -0.029276 |
| C                                                                               | 0.781481  | -3.578338 | 6.746750  | C                                                                               | 0.110425  | -6.834777 | 4.480424  | C                                                                               | 4.194826  | -6.503300 | -0.135843 |
| C                                                                               | 1.177130  | -1.320142 | 5.972849  | C                                                                               | 0.006022  | -6.237789 | 2.159065  | C                                                                               | 1.851178  | -5.969167 | 0.316627  |
| C                                                                               | 0.218698  | -2.976447 | 4.484430  | C                                                                               | -0.025829 | -4.532419 | 3.875390  | C                                                                               | 3.360077  | -4.236943 | -0.421064 |
| C                                                                               | 0.275984  | -3.925259 | 5.489660  | C                                                                               | 0.054465  | -5.504017 | 4.865311  | C                                                                               | 4.398561  | -5.158074 | -0.468957 |
| C                                                                               | 1.229309  | -2.281981 | 6.979658  | C                                                                               | 0.086101  | -7.216367 | 3.151892  | C                                                                               | 2.909058  | -6.879046 | 0.257202  |
| H                                                                               | 1.528558  | -0.316918 | 6.165956  | H                                                                               | -0.011190 | -6.530714 | 1.119385  | H                                                                               | 0.870123  | -6.297150 | 0.631355  |
| H                                                                               | -0.178407 | -3.243624 | 3.508420  | H                                                                               | -0.069283 | -3.483369 | 4.157543  | H                                                                               | 3.542009  | -3.197290 | -0.685514 |
| H                                                                               | -0.075566 | -4.935664 | 5.298139  | H                                                                               | 0.074374  | -5.236043 | 5.916857  | H                                                                               | 5.388424  | -4.823747 | -0.773057 |
| H                                                                               | 1.626098  | -2.006624 | 7.951819  | H                                                                               | 0.131048  | -8.268742 | 2.889171  | H                                                                               | 2.718759  | -7.914443 | 0.532696  |
| C                                                                               | -0.618416 | -2.453221 | -4.433274 | C                                                                               | -0.074099 | 4.886521  | 2.522161  | C                                                                               | 2.064196  | 4.670278  | 0.143398  |
| C                                                                               | -0.954341 | -4.698374 | -6.071978 | C                                                                               | 0.097902  | 6.834170  | 4.492904  | C                                                                               | 4.175100  | 6.558160  | 0.005446  |
| C                                                                               | -0.226934 | -3.731551 | -3.991184 | C                                                                               | -0.062000 | 4.534501  | 3.883233  | C                                                                               | 3.373870  | 4.317702  | 0.508464  |
| C                                                                               | -1.188737 | -2.316349 | -5.709059 | C                                                                               | -0.004579 | 6.242514  | 2.170128  | C                                                                               | 1.817415  | 5.978326  | -0.291377 |
| C                                                                               | -1.351941 | -3.439597 | -6.515311 | C                                                                               | 0.083144  | 7.218356  | 3.164985  | C                                                                               | 2.868535  | 6.896503  | -0.350684 |
| C                                                                               | -0.393550 | -4.842733 | -4.799656 | C                                                                               | 0.024501  | 5.503518  | 4.875213  | C                                                                               | 4.404715  | 5.245931  | 0.438610  |
| H                                                                               | 0.213715  | -3.841398 | -3.003471 | H                                                                               | -0.118433 | 3.485446  | 4.163376  | H                                                                               | 3.575771  | 3.305285  | 0.851781  |
| H                                                                               | -1.497778 | -1.344503 | -6.065750 | H                                                                               | -0.016147 | 6.537320  | 1.130901  | H                                                                               | 0.818493  | 6.277293  | -0.577621 |

|   |           |           |           |   |           |           |          |   |          |           |           |
|---|-----------|-----------|-----------|---|-----------|-----------|----------|---|----------|-----------|-----------|
| H | -1.793062 | -3.321416 | -7.500465 | H | 0.139819  | 8.270726  | 2.904409 | H | 2.654740 | 7.908728  | -0.688076 |
| H | -0.081837 | -5.820246 | -4.442865 | H | 0.036346  | 5.233575  | 5.926378 | H | 5.408522 | 4.944174  | 0.730912  |
| N | 0.579693  | -0.783711 | 3.630233  | N | -0.118755 | -3.816547 | 1.604133 | N | 1.092922 | -3.621415 | 0.008608  |
| H | 0.236917  | -1.179905 | 2.744324  | H | -0.132651 | -2.876248 | 2.013429 | H | 1.417894 | -2.668110 | -0.190069 |
| N | -0.409626 | -1.403024 | -3.541261 | N | -0.157356 | 3.824216  | 1.610235 | N | 1.095056 | 3.656996  | 0.225658  |
| H | -0.001073 | -1.654676 | -2.634944 | H | -0.208411 | 2.884678  | 2.018376 | H | 1.438895 | 2.721244  | 0.463986  |
| C | 0.849823  | -4.627025 | 7.808430  | F | 0.196391  | -7.792283 | 5.441068 | C | 5.317786 | -7.506256 | -0.223121 |
| C | -1.178571 | -5.907813 | -6.919578 | F | 0.190592  | 7.789015  | 5.455631 | H | 5.443126 | -7.867660 | -1.250643 |
| F | 1.717390  | -5.618981 | 7.496839  | C | -0.259329 | 0.005043  | 2.586948 | H | 5.119461 | -8.374885 | 0.411399  |
| F | -0.340672 | -5.237606 | 8.005539  | O | -0.309449 | 1.113777  | 1.990744 | H | 6.269092 | -7.062702 | 0.086352  |
| F | 1.237043  | -4.142861 | 9.002084  | O | -0.181576 | -1.103491 | 1.993780 | C | 5.304264 | 7.553320  | -0.092901 |
| F | -2.328531 | -6.554017 | -6.607806 | C | -0.256758 | 0.008291  | 4.107611 | H | 5.906009 | 7.376836  | -0.992101 |
| F | -0.195791 | -6.822307 | -6.781683 | H | -0.677074 | -0.919654 | 4.500715 | H | 5.975010 | 7.477375  | 0.768711  |
| F | -1.260371 | -5.616930 | -8.232327 | H | -0.806594 | 0.867966  | 4.496279 | H | 4.923202 | 8.577270  | -0.143388 |
| C | 0.372956  | -1.838202 | 0.128966  | H | 0.781491  | 0.084908  | 4.450186 | C | 1.861871 | -0.023899 | 0.240697  |
| O | 0.729536  | -1.362712 | -0.982886 |   |           |           |          | O | 1.288164 | 0.917600  | 0.854553  |
| O | -0.259162 | -1.185830 | 1.008519  |   |           |           |          | O | 1.262806 | -0.867478 | -0.484471 |
| C | 0.734236  | -3.278905 | 0.456986  |   |           |           |          | C | 3.365535 | -0.185207 | 0.406221  |
| H | 1.456527  | -3.282715 | 1.281510  |   |           |           |          | H | 3.548072 | -0.995948 | 1.121522  |
| H | 1.169574  | -3.789734 | -0.403521 |   |           |           |          | H | 3.825448 | 0.727586  | 0.788961  |
| H | -0.154761 | -3.816263 | 0.799503  |   |           |           |          | H | 3.825991 | -0.471799 | -0.542546 |

| Anion complex 2@PhCO <sub>2</sub> <sup>-</sup><br>ΔG <sup>0</sup> = -2496.78196 au |           |           |           | Anion complex 3@PhCO <sub>2</sub> <sup>-</sup><br>ΔG <sup>0</sup> = -2644.42200 au |           |           |           | Anion complex 4@PhCO <sub>2</sub> <sup>-</sup><br>ΔG <sup>0</sup> = -3053.29626 au |           |           |           |
|------------------------------------------------------------------------------------|-----------|-----------|-----------|------------------------------------------------------------------------------------|-----------|-----------|-----------|------------------------------------------------------------------------------------|-----------|-----------|-----------|
| C                                                                                  | -0.226776 | 0.029890  | -5.189450 | C                                                                                  | -0.456410 | 0.057753  | -5.004475 | C                                                                                  | -5.291164 | 0.058997  | 0.084948  |
| N                                                                                  | -0.679385 | 0.021555  | -2.338859 | N                                                                                  | -0.113963 | 0.089955  | -2.135325 | N                                                                                  | -2.404112 | 0.089805  | -0.052082 |
| C                                                                                  | -0.324047 | -1.143504 | -4.440784 | C                                                                                  | -0.448345 | -1.100591 | -4.228045 | C                                                                                  | -4.516020 | -1.099048 | 0.140349  |
| C                                                                                  | -0.365143 | 1.198668  | -4.438572 | C                                                                                  | -0.276569 | 1.231961  | -4.275178 | C                                                                                  | -4.550050 | 1.232266  | -0.048698 |
| C                                                                                  | -0.570278 | 1.152027  | -3.038088 | C                                                                                  | -0.120983 | 1.208417  | -2.866583 | C                                                                                  | -3.134332 | 1.207502  | -0.103808 |
| C                                                                                  | -0.564074 | -1.103086 | -3.046292 | C                                                                                  | -0.266541 | -1.044866 | -2.823759 | C                                                                                  | -3.102718 | -1.043143 | 0.057981  |
| S                                                                                  | -0.177854 | -2.786913 | -5.005727 | S                                                                                  | -0.612589 | -2.741319 | -4.786101 | S                                                                                  | -5.081976 | -2.741518 | 0.273285  |
| S                                                                                  | -0.319450 | 2.843502  | -5.012160 | S                                                                                  | -0.186350 | 2.855141  | -4.899999 | S                                                                                  | -5.164838 | 2.855864  | -0.195340 |
| C                                                                                  | -0.465783 | -3.407214 | -3.390237 | C                                                                                  | -0.421578 | -3.350911 | -3.157677 | C                                                                                  | -3.443853 | -3.348631 | 0.203889  |
| H                                                                                  | -0.474583 | -4.475077 | -3.232656 | H                                                                                  | -0.443551 | -4.416931 | -2.995926 | H                                                                                  | -3.282240 | -4.414267 | 0.246387  |
| C                                                                                  | -0.666250 | -2.431048 | -2.466049 | C                                                                                  | -0.246851 | -2.373086 | -2.228080 | C                                                                                  | -2.507342 | -2.369733 | 0.090210  |
| C                                                                                  | -0.550821 | 3.456379  | -3.385375 | C                                                                                  | 0.043918  | 3.498620  | -3.289618 | C                                                                                  | -3.542644 | 3.496569  | -0.315426 |
| H                                                                                  | -0.587560 | 4.523493  | -3.231657 | H                                                                                  | 0.161768  | 4.563749  | -3.166469 | H                                                                                  | -3.409766 | 4.561107  | -0.430501 |
| C                                                                                  | -0.656468 | 2.477566  | -2.446561 | C                                                                                  | 0.050036  | 2.546092  | -2.319174 | C                                                                                  | -2.576699 | 2.542962  | -0.243773 |
| C                                                                                  | 0.065989  | 0.037176  | -6.662326 | C                                                                                  | -0.571072 | 0.036653  | -6.501900 | C                                                                                  | -6.792654 | 0.038744  | 0.087738  |
| H                                                                                  | -0.434642 | 0.892721  | -7.133214 | H                                                                                  | -1.060865 | 0.955562  | -6.847308 | H                                                                                  | -7.173451 | 0.960477  | 0.544868  |
| H                                                                                  | -0.345981 | -0.868616 | -7.124476 | H                                                                                  | -1.208858 | -0.800576 | -6.812066 | H                                                                                  | -7.150568 | -0.795050 | 0.704326  |
| C                                                                                  | 1.576351  | 0.110669  | -6.942201 | C                                                                                  | 0.806085  | -0.092811 | -7.174951 | C                                                                                  | -7.359544 | -0.097895 | -1.336008 |
| H                                                                                  | 2.072673  | -0.736456 | -6.452764 | H                                                                                  | 1.290881  | -1.012599 | -6.825878 | H                                                                                  | -6.972451 | -1.018643 | -1.789043 |
| H                                                                                  | 1.981483  | 1.023582  | -6.488830 | H                                                                                  | 1.440787  | 0.743123  | -6.856411 | H                                                                                  | -6.996553 | 0.736527  | -1.948298 |
| C                                                                                  | 1.868114  | 0.095032  | -8.440315 | C                                                                                  | 0.685026  | -0.108303 | -8.696352 | C                                                                                  | -8.885502 | -0.118489 | -1.329705 |
| H                                                                                  | 2.943545  | 0.156623  | -8.633042 | H                                                                                  | 1.667744  | -0.199850 | -9.168716 | H                                                                                  | -9.281624 | -0.216261 | -2.345009 |
| H                                                                                  | 1.384269  | 0.941905  | -8.939634 | H                                                                                  | 0.218745  | 0.814941  | -9.057936 | H                                                                                  | -9.284940 | 0.805171  | -0.896561 |
| H                                                                                  | 1.492905  | -0.826576 | -8.899005 | H                                                                                  | 0.068300  | -0.950673 | -9.028813 | H                                                                                  | -9.260271 | -0.959744 | -0.736180 |
| N                                                                                  | -0.964762 | -2.525712 | -1.114601 | N                                                                                  | -0.044165 | -2.485893 | -0.857704 | N                                                                                  | -1.124167 | -2.479967 | -0.011766 |
| H                                                                                  | -1.241596 | -1.658608 | -0.644050 | H                                                                                  | 0.039978  | -1.615014 | -0.323699 | H                                                                                  | -0.590585 | -1.605294 | -0.052521 |
| N                                                                                  | -0.816961 | 2.571721  | -1.070392 | N                                                                                  | 0.187653  | 2.691520  | -0.943869 | N                                                                                  | -1.193201 | 2.687011  | -0.275880 |
| H                                                                                  | -0.707476 | 1.709975  | -0.522865 | H                                                                                  | -0.055943 | 1.885117  | -0.356483 | H                                                                                  | -0.629083 | 1.883664  | 0.028924  |
| C                                                                                  | -0.951155 | -3.692648 | -0.378730 | C                                                                                  | 0.155125  | -3.681676 | -0.203307 | C                                                                                  | -0.457758 | -3.669805 | -0.154052 |
| C                                                                                  | -0.941911 | 3.759604  | -0.378119 | C                                                                                  | 0.492065  | 3.879947  | -0.319362 | C                                                                                  | -0.550269 | 3.869506  | -0.528752 |
| O                                                                                  | -0.536511 | -4.761490 | -0.842548 | O                                                                                  | 0.090287  | -4.769223 | -0.777626 | O                                                                                  | -1.023346 | -4.760418 | -0.138824 |
| O                                                                                  | -1.034187 | 4.851924  | -0.952777 | O                                                                                  | 0.756203  | 4.909941  | -0.940618 | O                                                                                  | -1.133577 | 4.898885  | -0.860143 |
| C                                                                                  | -1.191020 | -4.548863 | 1.908275  | C                                                                                  | 0.688613  | -4.525397 | 2.074644  | C                                                                                  | 1.865622  | -4.479457 | -0.495006 |
| H                                                                                  | -1.926596 | -4.385527 | 2.703171  | C                                                                                  | 1.206116  | -6.388122 | 4.116781  | C                                                                                  | 3.948342  | -6.287802 | -0.825239 |
| H                                                                                  | -1.371296 | -5.543408 | 1.488073  | C                                                                                  | 0.375247  | -5.879536 | 1.888585  | C                                                                                  | 1.613454  | -5.864252 | -0.441012 |
| C                                                                                  | 0.222927  | -4.460258 | 2.481475  | C                                                                                  | 1.261870  | -4.115931 | 3.290225  | C                                                                                  | 3.183468  | -4.026954 | -0.723870 |
| H                                                                                  | 0.412168  | -3.426053 | 2.799527  | C                                                                                  | 1.512021  | -5.038058 | 4.300812  | C                                                                                  | 4.223437  | -4.921072 | -0.885388 |
| H                                                                                  | 0.947775  | -4.691550 | 1.688799  | C                                                                                  | 0.641079  | -6.794234 | 2.908736  | C                                                                                  | 2.657715  | -6.762166 | -0.607567 |
| C                                                                                  | 0.427249  | -5.398926 | 3.667828  | H                                                                                  | -0.071285 | -6.210269 | 0.960829  | H                                                                                  | 0.611399  | -6.228673 | -0.268705 |
| H                                                                                  | -0.312423 | -5.157490 | 4.443900  | H                                                                                  | 1.512733  | -3.066810 | 3.432877  | H                                                                                  | 3.378524  | -2.959176 | -0.778998 |
| H                                                                                  | 0.229077  | -6.433511 | 3.356610  | H                                                                                  | 1.953855  | -4.697777 | 5.233242  | H                                                                                  | 5.233488  | -4.569287 | -1.060225 |
| C                                                                                  | 1.834434  | -5.292761 | 4.252795  | H                                                                                  | 0.393499  | -7.840490 | 2.750436  | H                                                                                  | 2.469751  | -7.828933 | -0.564036 |
| H                                                                                  | 2.032704  | -4.270061 | 4.595754  | H                                                                                  | 1.404217  | -7.110370 | 4.902990  | C                                                                                  | 1.774653  | 4.747176  | -0.581479 |
| H                                                                                  | 2.589180  | -5.545501 | 3.499239  | C                                                                                  | 0.720985  | 4.787939  | 1.988688  | C                                                                                  | 3.834435  | 6.577111  | -0.930161 |
| H                                                                                  | 1.968034  | -5.967346 | 5.104669  | C                                                                                  | 1.177293  | 6.674720  | 4.024762  | C                                                                                  | 3.106448  | 4.400549  | -0.266712 |
| C                                                                                  | -0.985786 | 4.772512  | 1.849685  | C                                                                                  | 0.431269  | 4.481358  | 3.329222  | C                                                                                  | 1.497540  | 6.034571  | -1.080804 |
| H                                                                                  | -1.413708 | 4.456991  | 2.806592  | C                                                                                  | 1.248859  | 6.048763  | 1.675198  | C                                                                                  | 2.530674  | 6.944380  | -1.251968 |
| H                                                                                  | -1.652996 | 5.527332  | 1.421957  | C                                                                                  | 1.467399  | 6.976599  | 2.695429  | C                                                                                  | 4.134702  | 5.306315  | -0.437660 |
| C                                                                                  | 0.405255  | 5.367472  | 2.067027  | C                                                                                  | 0.658593  | 5.415033  | 4.333788  | H                                                                                  | 3.321017  | 3.406180  | 0.115704  |
| H                                                                                  | 1.063470  | 4.595297  | 2.488208  | H                                                                                  | 0.027100  | 3.501433  | 3.574199  | H                                                                                  | 0.484616  | 6.315085  | -1.329490 |

|   |           |           |          |   |           |           |          |   |          |           |           |
|---|-----------|-----------|----------|---|-----------|-----------|----------|---|----------|-----------|-----------|
| H | 0.825706  | 5.653165  | 1.093621 | H | 1.483099  | 6.299129  | 0.650052 | H | 2.323481 | 7.936720  | -1.635807 |
| C | 0.374938  | 6.581649  | 2.993421 | H | 1.875612  | 7.950111  | 2.437136 | H | 5.155680 | 5.037452  | -0.193406 |
| H | -0.056595 | 6.288763  | 3.959876 | H | 0.426651  | 5.155265  | 5.362897 | N | 0.901076 | -3.498684 | -0.330491 |
| H | -0.294597 | 7.342118  | 2.569994 | H | 1.353072  | 7.405801  | 4.808048 | H | 1.232151 | -2.525310 | -0.306450 |
| C | 1.763022  | 7.181762  | 3.210412 | N | 0.434935  | -3.520282 | 1.128433 | N | 0.820045 | 3.764923  | -0.379005 |
| H | 2.439814  | 6.444350  | 3.656962 | H | 0.487266  | -2.551192 | 1.460368 | H | 1.155565 | 2.871532  | -0.005968 |
| H | 1.725490  | 8.051342  | 3.874390 | N | 0.477526  | 3.776653  | 1.048319 | N | 4.907632 | 7.536851  | -1.111823 |
| H | 2.200064  | 7.502623  | 2.257919 | H | 0.133969  | 2.887015  | 1.418743 | O | 6.048945 | 7.195747  | -0.826860 |
| N | -1.450728 | -3.555480 | 0.877411 | C | -0.559272 | 0.131356  | 1.865834 | O | 4.630316 | 8.649683  | -1.541199 |
| H | -1.690794 | -2.608431 | 1.172779 | O | -0.753754 | 1.256832  | 1.335097 | N | 5.034676 | -7.235348 | -0.993756 |
| N | -0.987970 | 3.615221  | 0.970684 | O | 0.230532  | -0.744575 | 1.419812 | O | 4.776538 | -8.432100 | -0.966016 |
| H | -0.750475 | 2.700563  | 1.354719 | C | -1.335065 | -0.179424 | 3.131905 | O | 6.167584 | -6.799541 | -1.156648 |
| C | -0.957891 | -0.138210 | 1.594824 | C | -2.757546 | -0.727174 | 5.482521 | C | 1.486555 | 0.123745  | 0.797855  |
| O | -0.255284 | 0.833190  | 1.208976 | C | -1.375261 | -1.477516 | 3.648414 | O | 0.961420 | 1.265117  | 0.884734  |
| O | -1.898952 | -0.664075 | 0.937663 | C | -2.021085 | 0.841803  | 3.797642 | O | 1.168848 | -0.747297 | -0.057230 |
| C | -0.637914 | -0.755956 | 2.944426 | C | -2.723766 | 0.571695  | 4.971246 | C | 2.576586 | -0.210714 | 1.794947  |
| C | -0.014685 | -2.003002 | 5.373163 | C | -2.085643 | -1.753544 | 4.815949 | C | 4.599618 | -0.806987 | 3.636326  |
| C | -1.584181 | -1.556776 | 3.592290 | H | -0.856724 | -2.277912 | 3.130973 | C | 2.921821 | -1.538883 | 2.059791  |
| C | 0.618848  | -0.571088 | 3.529937 | H | -1.995950 | 1.847486  | 3.388817 | C | 3.244357 | 0.817635  | 2.467750  |
| C | 0.933190  | -1.200672 | 4.734213 | H | -3.246516 | 1.372972  | 5.485951 | C | 4.258658 | 0.522190  | 3.377147  |
| C | -1.278860 | -2.172324 | 4.804910 | H | -2.114130 | -2.767907 | 5.204584 | C | 3.924671 | -1.838316 | 2.980744  |
| H | -2.562082 | -1.697797 | 3.138886 | H | -3.307379 | -0.939611 | 6.395225 | H | 2.391018 | -2.341904 | 1.557833  |
| H | 1.350305  | 0.054114  | 3.025870 |   |           |           |          | H | 2.965135 | 1.848001  | 2.267748  |
| H | 1.918485  | -1.069615 | 5.172961 |   |           |           |          | H | 4.780989 | 1.327152  | 3.886380  |
| H | -2.021083 | -2.793332 | 5.299441 |   |           |           |          | H | 4.178210 | -2.874565 | 3.186428  |
| H | 0.232107  | -2.497515 | 6.309025 |   |           |           |          | H | 5.386438 | -1.037847 | 4.349055  |

| Anion complex 5@PhCO <sub>2</sub> <sup>-</sup><br>$\Delta G^0 = -3318.30710$ au |           |           |           | Anion complex 6@PhCO <sub>2</sub> <sup>-</sup><br>$\Delta G^0 = -2842.85217$ au |           |           |           | Anion complex 7@PhCO <sub>2</sub> <sup>-</sup><br>$\Delta G^0 = -2722.96742$ au |           |           |           |
|---------------------------------------------------------------------------------|-----------|-----------|-----------|---------------------------------------------------------------------------------|-----------|-----------|-----------|---------------------------------------------------------------------------------|-----------|-----------|-----------|
| C                                                                               | -5.437059 | 0.052398  | 0.011546  | C                                                                               | -0.029354 | 0.031410  | 5.146066  | C                                                                               | -0.084082 | -0.008666 | 5.607436  |
| N                                                                               | -2.548046 | 0.077894  | -0.077443 | N                                                                               | -0.126533 | 0.080752  | 2.261322  | N                                                                               | -0.100936 | 0.001161  | 2.719269  |
| C                                                                               | -4.665982 | -1.108310 | 0.059624  | C                                                                               | 0.054950  | 1.210378  | 4.404545  | C                                                                               | -0.087432 | 1.164442  | 4.852644  |
| C                                                                               | -4.690782 | 1.225856  | -0.090426 | C                                                                               | -0.164384 | -1.121205 | 4.371371  | C                                                                               | -0.086482 | -1.176462 | 4.844283  |
| C                                                                               | -3.274335 | 1.198828  | -0.123737 | C                                                                               | -0.191512 | -1.055588 | 2.957332  | C                                                                               | -0.107535 | -1.129633 | 3.428775  |
| C                                                                               | -3.251182 | -1.055073 | 0.002953  | C                                                                               | -0.012230 | 1.192592  | 2.990141  | C                                                                               | -0.084202 | 1.126959  | 3.436741  |
| S                                                                               | -5.238761 | -2.751174 | 0.156836  | S                                                                               | 0.252199  | 2.834489  | 5.005976  | S                                                                               | -0.098073 | 2.804492  | 5.442135  |
| S                                                                               | -5.300851 | 2.852736  | -0.218016 | S                                                                               | -0.300526 | -2.767514 | 4.928290  | S                                                                               | -0.064909 | -2.820536 | 5.422733  |
| C                                                                               | -3.600894 | -3.361478 | 0.104271  | C                                                                               | 0.219832  | 3.480336  | 3.378292  | C                                                                               | -0.076369 | 3.429762  | 3.807370  |
| H                                                                               | -3.442224 | -4.427996 | 0.131221  | H                                                                               | 0.315429  | 4.545849  | 3.238822  | H                                                                               | -0.072412 | 4.498258  | 3.659661  |
| C                                                                               | -2.659211 | -2.384011 | 0.025128  | C                                                                               | 0.067871  | 2.527391  | 2.420574  | C                                                                               | -0.064932 | 2.459741  | 2.854723  |
| C                                                                               | -3.675597 | 3.491537  | -0.302931 | C                                                                               | -0.368686 | -3.358100 | 3.280250  | C                                                                               | -0.109253 | -3.434763 | 3.784292  |
| H                                                                               | -3.539374 | 4.557437  | -0.398864 | H                                                                               | -0.453836 | -4.420179 | 3.111475  | H                                                                               | -0.113907 | -4.502262 | 3.629519  |
| C                                                                               | -2.711495 | 2.535569  | -0.234036 | C                                                                               | -0.293281 | -2.371477 | 2.348136  | C                                                                               | -0.136363 | -2.458627 | 2.838309  |
| C                                                                               | -6.938442 | 0.037604  | -0.008186 | C                                                                               | 0.088475  | -0.001109 | 6.642838  | C                                                                               | -0.019959 | -0.014332 | 7.107697  |
| H                                                                               | -7.322462 | 0.948374  | 0.468144  | H                                                                               | -0.497860 | -0.838124 | 7.041822  | H                                                                               | -0.544172 | -0.896322 | 7.496254  |
| H                                                                               | -7.307952 | -0.810901 | 0.580804  | H                                                                               | -0.335736 | 0.917503  | 7.067069  | H                                                                               | -0.541456 | 0.866289  | 7.502880  |
| C                                                                               | -7.486589 | -0.059377 | -1.442381 | C                                                                               | 1.552752  | -0.142973 | 7.092347  | C                                                                               | 1.431820  | -0.017492 | 7.616400  |
| H                                                                               | -7.098433 | -0.970738 | -1.913235 | H                                                                               | 2.135367  | 0.692125  | 6.684773  | H                                                                               | 1.951295  | 0.864482  | 7.222430  |
| H                                                                               | -7.111037 | 0.788121  | -2.028644 | H                                                                               | 1.971209  | -1.062447 | 6.665204  | H                                                                               | 1.950285  | -0.897954 | 7.217881  |
| C                                                                               | -9.012669 | -0.071354 | -1.456353 | C                                                                               | 1.671027  | -0.170860 | 8.613669  | C                                                                               | 1.488477  | -0.021679 | 9.141509  |
| H                                                                               | -9.396306 | -0.143506 | -2.478572 | H                                                                               | 2.714730  | -0.276876 | 8.924872  | H                                                                               | 2.523325  | -0.029367 | 9.496885  |
| H                                                                               | -9.412461 | 0.844467  | -1.007070 | H                                                                               | 1.104654  | -1.010120 | 9.032362  | H                                                                               | 0.983424  | -0.905648 | 9.546438  |
| H                                                                               | -9.399543 | -0.923804 | -0.887043 | H                                                                               | 1.278290  | 0.753516  | 9.051443  | H                                                                               | 0.994733  | 0.866432  | 9.551224  |
| N                                                                               | -1.275323 | -2.495389 | -0.050959 | N                                                                               | -0.031995 | 2.656589  | 1.041323  | N                                                                               | -0.026025 | 2.574652  | 1.470788  |
| H                                                                               | -0.740590 | -1.621094 | -0.069212 | H                                                                               | -0.292818 | 1.815876  | 0.510487  | H                                                                               | 0.105336  | 1.710271  | 0.932450  |
| N                                                                               | -1.328112 | 2.679657  | -0.247472 | N                                                                               | -0.275915 | -2.452556 | 0.960076  | N                                                                               | -0.201431 | -2.565282 | 1.454260  |
| H                                                                               | -0.767289 | 1.874047  | 0.055286  | H                                                                               | -0.087973 | -1.581423 | 0.451086  | H                                                                               | -0.365682 | -1.700814 | 0.924625  |
| C                                                                               | -0.603683 | -3.688412 | -0.164058 | C                                                                               | 0.104909  | 3.844806  | 0.362291  | C                                                                               | -0.091084 | 3.771855  | 0.793034  |
| C                                                                               | -0.681618 | 3.866586  | -0.487109 | C                                                                               | -0.291530 | -3.634185 | 0.255427  | C                                                                               | -0.136242 | -3.757051 | 0.767528  |
| O                                                                               | -1.176712 | -4.777322 | -0.159513 | O                                                                               | 0.429560  | 4.895178  | 0.919137  | O                                                                               | -0.265228 | 4.847652  | 1.368661  |
| O                                                                               | -1.270851 | 4.897143  | -0.810491 | O                                                                               | -0.473312 | -4.726654 | 0.793859  | O                                                                               | 0.072645  | -4.833796 | 1.329630  |
| C                                                                               | 1.726502  | -4.517263 | -0.413415 | C                                                                               | -0.013634 | 4.696326  | -1.975495 | C                                                                               | -0.067995 | 4.629858  | -1.541111 |
| C                                                                               | 3.824072  | -6.354818 | -0.658183 | C                                                                               | 0.209550  | 6.476428  | -4.090393 | C                                                                               | -0.286193 | 6.496005  | -3.662749 |
| C                                                                               | 1.476937  | -5.893555 | -0.286088 | C                                                                               | 0.343747  | 6.031245  | -1.737367 | C                                                                               | -0.025559 | 6.005338  | -1.281299 |
| C                                                                               | 3.040386  | -4.079565 | -0.666324 | C                                                                               | -0.255968 | 4.277659  | -3.294822 | C                                                                               | -0.220832 | 4.198600  | -2.867936 |
| C                                                                               | 4.079645  | -4.988032 | -0.786846 | C                                                                               | -0.147899 | 5.164075  | -4.359289 | C                                                                               | -0.323502 | 5.117079  | -3.905432 |
| C                                                                               | 2.526137  | -6.798504 | -0.413243 | C                                                                               | 0.456722  | 6.923054  | -2.805392 | C                                                                               | -0.140064 | 6.911412  | -2.337748 |
| H                                                                               | 0.476037  | -6.248596 | -0.086984 | H                                                                               | 0.532721  | 6.372594  | -0.729401 | H                                                                               | 0.092419  | 6.364511  | -0.268095 |
| H                                                                               | 3.237614  | -3.015328 | -0.769861 | H                                                                               | -0.529660 | 3.242176  | -3.484702 | H                                                                               | -0.265286 | 3.131891  | -3.077950 |
| H                                                                               | 5.086667  | -4.630816 | -0.980854 | H                                                                               | -0.334002 | 4.843998  | -5.379668 | H                                                                               | -0.443215 | 4.752900  | -4.923969 |
| H                                                                               | 2.322868  | -7.860639 | -0.311397 | H                                                                               | 0.733835  | 7.958829  | -2.635222 | H                                                                               | -0.109929 | 7.976036  | -2.114719 |
| C                                                                               | 1.638837  | 4.764605  | -0.507744 | C                                                                               | 0.020203  | -4.518292 | -2.018911 | C                                                                               | -0.209556 | -4.606184 | -1.567917 |
| C                                                                               | 3.703701  | 6.633823  | -0.788145 | C                                                                               | 0.260734  | -6.489492 | -3.942756 | C                                                                               | -0.035574 | -6.468950 | -3.695901 |
| C                                                                               | 2.961489  | 4.432230  | -0.163647 | C                                                                               | 0.977507  | -4.405256 | -3.034240 | C                                                                               | -0.087342 | -4.172643 | -2.897081 |
| C                                                                               | 1.362845  | 6.051142  | -1.001829 | C                                                                               | -0.817386 | -5.639817 | -1.982562 | C                                                                               | -0.249612 | -5.981652 | -1.309315 |
| C                                                                               | 2.396316  | 6.971427  | -1.136684 | C                                                                               | -0.690574 | -6.638969 | -2.946332 | C                                                                               | -0.158286 | -6.886358 | -2.369231 |
| C                                                                               | 3.985915  | 5.356466  | -0.303178 | C                                                                               | 1.097962  | -5.388349 | -4.013144 | C                                                                               | -0.009442 | -5.089547 | -3.937990 |
| H                                                                               | 3.178885  | 3.437855  | 0.218419  | H                                                                               | 1.640395  | -3.544815 | -3.049989 | H                                                                               | -0.055095 | -3.105540 | -3.107036 |
| H                                                                               | 0.353685  | 6.324939  | -1.273612 | H                                                                               | -1.566863 | -5.729824 | -1.205262 | H                                                                               | -0.352857 | -6.341948 | -0.294782 |

|   |          |           |           |   |           |           |           |   |           |           |           |
|---|----------|-----------|-----------|---|-----------|-----------|-----------|---|-----------|-----------|-----------|
| H | 2.173769 | 7.964093  | -1.519161 | H | -1.329522 | -7.516239 | -2.933188 | H | -0.192883 | -7.951245 | -2.148208 |
| H | 4.999460 | 5.079753  | -0.030375 | H | 1.834739  | -5.309493 | -4.806173 | H | 0.078843  | -4.723528 | -4.959132 |
| N | 0.756233 | -3.524422 | -0.286624 | N | -0.153317 | 3.721093  | -0.977828 | N | 0.053126  | 3.629629  | -0.560952 |
| H | 1.090766 | -2.553572 | -0.272285 | H | -0.462195 | 2.795007  | -1.289509 | H | 0.198354  | 2.673630  | -0.900788 |
| N | 0.683202 | 3.764507  | -0.338739 | N | -0.093590 | -3.463641 | -1.091082 | N | -0.312708 | -3.609058 | -0.582018 |
| H | 1.024024 | 2.867245  | 0.017293  | H | 0.198040  | -2.529407 | -1.397396 | H | -0.496988 | -2.657294 | -0.912402 |
| C | 4.929617 | -7.343127 | -0.844238 | F | 0.320588  | 7.350776  | -5.124890 | C | -0.373100 | 7.488889  | -4.794889 |
| C | 4.791207 | 7.639965  | -0.984991 | F | 0.378417  | -7.460657 | -4.884583 | H | 0.609941  | 7.648224  | -5.253389 |
| F | 6.129039 | -6.852878 | -0.473993 | C | -0.393585 | 0.112237  | -1.732082 | H | -0.734680 | 8.458762  | -4.441439 |
| F | 5.068555 | -7.727458 | -2.136808 | O | 0.438793  | -0.687880 | -1.224996 | H | -1.047418 | 7.134052  | -5.580243 |
| F | 4.735174 | -8.476240 | -0.141374 | O | -0.991979 | 1.025400  | -1.100586 | C | 0.086555  | -7.460336 | -4.826028 |
| F | 5.127663 | 7.789016  | -2.289012 | C | -0.703684 | -0.033294 | -3.208158 | H | 1.133643  | -7.588830 | -5.124660 |
| F | 5.926214 | 7.316991  | -0.338476 | C | -1.278350 | -0.317480 | -5.932987 | H | -0.466428 | -7.124173 | -5.708562 |
| F | 4.434958 | 8.870941  | -0.558417 | C | -1.775290 | 0.660975  | -3.778815 | H | -0.297358 | -8.441225 | -4.531271 |
| C | 1.353088 | 0.111063  | 0.836512  | C | 0.079797  | -0.865863 | -4.012489 | C | -0.196821 | 0.004062  | -1.314644 |
| O | 0.838134 | 1.257797  | 0.914022  | C | -0.202973 | -1.007479 | -5.370201 | O | -0.924088 | -0.831825 | -0.712995 |
| O | 1.022467 | -0.768768 | -0.003712 | C | -2.064553 | 0.516972  | -5.135095 | O | 0.550070  | 0.849724  | -0.751559 |
| C | 2.448825 | -0.222732 | 1.828513  | H | -2.380523 | 1.308889  | -3.151427 | C | -0.221770 | -0.008851 | -2.829782 |
| C | 4.483648 | -0.820770 | 3.656537  | H | 0.918482  | -1.391345 | -3.566841 | C | -0.269632 | -0.031739 | -5.627796 |
| C | 2.811180 | -1.550407 | 2.073085  | H | 0.414411  | -1.653711 | -5.988137 | C | 0.756236  | 0.676070  | -3.557528 |
| C | 3.106477 | 0.803890  | 2.513747  | H | -2.902214 | 1.054348  | -5.570974 | C | -1.223826 | -0.705578 | -3.512388 |
| C | 4.125911 | 0.507722  | 3.417335  | H | -1.502655 | -0.428177 | -6.990295 | C | -1.251861 | -0.713421 | -4.906327 |
| C | 3.820158 | -1.850767 | 2.987011  |   |           |           |           | C | 0.736834  | 0.661169  | -4.951547 |
| H | 2.290205 | -2.351788 | 1.558254  |   |           |           |           | H | 1.531050  | 1.218106  | -3.022756 |
| H | 2.815104 | 1.833584  | 2.327968  |   |           |           |           | H | -1.978967 | -1.240165 | -2.942955 |
| H | 4.639559 | 1.311594  | 3.937075  |   |           |           |           | H | -2.036907 | -1.252000 | -5.429839 |
| H | 4.087808 | -2.886675 | 3.176195  |   |           |           |           | H | 1.503769  | 1.190830  | -5.509914 |
| H | 5.274884 | -1.052241 | 4.364214  |   |           |           |           | H | -0.288239 | -0.040447 | -6.714193 |

## 7. References

- [1] APEX2,. Bruker AXS Inc., Madison, Wisconsin, USA, **2013**.
- [2] SADABS,. Bruker AXS Inc., Madison, Wisconsin, USA, **2012**.
- [3] Sheldrick G. M., *Acta Crystallogr.* **1990**, A46, 467-473; Sheldrick, G. M. *Acta Cryst.*, **2008**, A64, 112–122.
- [4] *International Tables for Crystallography*, Ed. A. J. C. Wilson, Kluwer: Dordrecht, **1992**, Vol.C.
- [5] Rodríguez-Barrientos, D.; Rojas-Hernández, A.; Gutiérrez, A.; Moya-Hernández, R.; Gómez-Balderas, R.; Ramírez-Silva, M. T., *Talanta*, **2009**, 80, 754-762.
