# Supplementary material for: Solution and Solid State Studies of Urea Derivatives of DITIPIRAM Acting as Powerful Anion Receptors
Source: Molecules. 2021 Mar 22;26(6):1788. doi: 10.3390/molecules26061788 (PMC8004752; doi:10.3390/molecules26061788)
Supplement: Supplementary file 1 [file molecules-26-01788-s001.zip]

Archive with 5 entries (5 files):
- 6_(Cl)TBA.cif
- 6_(Cl)TBA-checkcif.pdf
- 6_(DMSO_H2O).cif
- 6_(DMSO_H2O)-checkcif.pdf
- DITIPIRAM_SI.pdf
