# Supplementary material for: Solution and Solid State Studies of Urea Derivatives of DITIPIRAM Acting as Powerful Anion Receptors
Source: Molecules. 2021 Mar 22;26(6):1788. doi: 10.3390/molecules26061788 (PMC8004752; doi:10.3390/molecules26061788)
Supplement: Supplementary file 1 [file molecules-26-01788-s001.zip › 6_(Cl)TBA.cif]

data_5B_TBACl
_chemical_name_systematic               ?
_chemical_name_common                   ?
_chemical_formula_moiety                ?
_chemical_formula_sum                   'C42 H57 Cl F2 N6 O2 S2'
_chemical_formula_iupac                 ?
_chemical_formula_weight                815.50
_chemical_absolute_configuration        ?

_chemical_melting_point                 ?

_space_group_crystal_system             monoclinic
_space_group_name_H-M_alt               'P 1 21 1'
_space_group_name_Hall                  'P 2yb'
loop_
    _space_group_symop_operation_xyz
    'x, y, z'
    '-x, y+1/2, -z'

_cell_length_a                          8.4288(4)
_cell_length_b                          28.6479(13)
_cell_length_c                          17.9789(8)
_cell_angle_alpha                       90
_cell_angle_beta                        99.7682(13)
_cell_angle_gamma                       90
_cell_volume                            4278.4(3)
_cell_formula_units_Z                   4
_cell_measurement_reflns_used           9902
_cell_measurement_theta_min             2.9662
_cell_measurement_theta_max             25.3394
_cell_measurement_temperature           100.(2)

_exptl_crystal_description              plate
_exptl_crystal_colour                   colourless
_exptl_crystal_size_max                 0.296
_exptl_crystal_size_mid                 0.246
_exptl_crystal_size_min                 0.034
_exptl_crystal_density_diffrn           1.266
_exptl_crystal_density_meas             ?
_exptl_crystal_density_method           'not measured'
_exptl_crystal_F_000                    1736

_exptl_absorpt_coefficient_mu           0.238
_exptl_absorpt_correction_type          multi-scan
_exptl_absorpt_process_details          'SADABS V2012/1 (Bruker AXS Inc.)'
_exptl_absorpt_correction_T_min         0.92
_exptl_absorpt_correction_T_max         0.99

_exptl_special_details                  
;
; 

_diffrn_ambient_temperature             100.(2)

_diffrn_source                          'fine focus sealed tube'
_diffrn_source_type                     ?

_diffrn_radiation_type                  MoK\a
_diffrn_radiation_wavelength            0.71073
_diffrn_radiation_monochromator         TRIUMPH

_diffrn_measurement_device_type         'Bruker D8 VENTURE'
_diffrn_measurement_method              'omega scans'

_diffrn_detector_area_resol_mean        10.4167

_diffrn_reflns_number                   70952
_diffrn_reflns_av_R_equivalents         0.0415
_diffrn_reflns_av_unetI/netI            0.0394
_diffrn_reflns_theta_min                2.90
_diffrn_reflns_theta_max                25.05
_diffrn_reflns_theta_full               25.05
_diffrn_measured_fraction_theta_max     0.998
_diffrn_measured_fraction_theta_full    0.998
_diffrn_reflns_limit_h_min              -10
_diffrn_reflns_limit_h_max              10
_diffrn_reflns_limit_k_min              -34
_diffrn_reflns_limit_k_max              34
_diffrn_reflns_limit_l_min              -21
_diffrn_reflns_limit_l_max              21

_refine_special_details                 
    'Refined as a 2-component inversion twin.'

_reflns_number_total                    15117
_reflns_number_gt                       13305
_reflns_threshold_expression            'I > 2\s(I)'

_refine_ls_structure_factor_coef        Fsqd
_refine_ls_matrix_type                  full
_refine_ls_R_factor_all                 0.0473
_refine_ls_R_factor_gt                  0.0365
_refine_ls_wR_factor_gt                 0.0762
_refine_ls_wR_factor_ref                0.0807
_refine_ls_goodness_of_fit_ref          1.028
_refine_ls_restrained_S_all             1.030
_refine_ls_number_reflns                15117
_refine_ls_number_parameters            1098
_refine_ls_number_restraints            43
_refine_ls_hydrogen_treatment           mixed
_refine_ls_weighting_scheme             calc
_refine_ls_weighting_details            
    'w=1/[\s^2^(Fo^2^)+(0.0421P)^2^+0.6066P] where P=(Fo^2^+2Fc^2^)/3'

_atom_sites_solution_hydrogens          mixed
_atom_sites_solution_primary            ?
_atom_sites_solution_secondary          ?

_refine_ls_shift/su_max                 0.001
_refine_ls_shift/su_mean                0.000
_refine_diff_density_max                0.216
_refine_diff_density_min                -0.227
_refine_ls_extinction_method            none
_refine_ls_extinction_coef              ?
_refine_ls_abs_structure_details        'Refined as an inversion twin.'
_refine_ls_abs_structure_Flack          0.35(5)

loop_
    _atom_type_symbol
    _atom_type_description
    _atom_type_scat_dispersion_real
    _atom_type_scat_dispersion_imag
    _atom_type_scat_source
    C C 0.0033 0.0016 'International Tables Vol C Tables 4.2.6.8 and 6.1.1.4'
    H H 0.0000 0.0000 'International Tables Vol C Tables 4.2.6.8 and 6.1.1.4'
    N N 0.0061 0.0033 'International Tables Vol C Tables 4.2.6.8 and 6.1.1.4'
    O O 0.0106 0.0060 'International Tables Vol C Tables 4.2.6.8 and 6.1.1.4'
    F F 0.0171 0.0103 'International Tables Vol C Tables 4.2.6.8 and 6.1.1.4'
    S S 0.1246 0.1234 'International Tables Vol C Tables 4.2.6.8 and 6.1.1.4'
    Cl Cl 0.1484 0.1585
     'International Tables Vol C Tables 4.2.6.8 and 6.1.1.4'

_computing_data_collection              'APEX2 V2013 (Bruker AXS Inc., 2013)'
_computing_cell_refinement              'SAINT V8.34A (Bruker AXS Inc., 2013)'
_computing_data_reduction               'SAINT V8.34A (Bruker AXS Inc., 2013)'
_computing_structure_solution           'SHELXS-97 (Sheldrick, 2008)'
_computing_structure_refinement         'SHELXL-2013 (Sheldrick, 2013)'
_computing_molecular_graphics           ?
_computing_publication_material         'APEX2 V2013 (Bruker AXS Inc., 2013)'

loop_
    _atom_site_type_symbol
    _atom_site_label
    _atom_site_fract_x
    _atom_site_fract_y
    _atom_site_fract_z
    _atom_site_U_iso_or_equiv
    _atom_site_adp_type
    _atom_site_calc_flag
    _atom_site_refinement_flags_adp
    _atom_site_refinement_flags_occupancy
    _atom_site_refinement_flags_posn
    _atom_site_occupancy
    _atom_site_disorder_assembly
    _atom_site_disorder_group
    Cl Cl1A 0.15137(10) 0.39746(3) 0.68002(5) 0.02109(19) Uani d . . . 1.0 . .
    S S1A 0.33712(11) 0.40068(3) 1.07246(5) 0.0230(2) Uani d . . . 1.0 . .
    S S2A 0.53907(12) 0.56098(3) 0.93057(5) 0.0274(2) Uani d . . . 1.0 . .
    F F1A -0.0994(3) 0.13369(8) 0.64408(13) 0.0388(6) Uani d . . . 1.0 . .
    F F2A -0.1946(3) 0.58302(8) 0.36945(12) 0.0374(6) Uani d . . . 1.0 . .
    O O1A 0.1569(3) 0.28244(9) 0.90085(14) 0.0327(7) Uani d . . . 1.0 . .
    O O2A 0.3164(3) 0.56901(8) 0.67745(14) 0.0264(6) Uani d . . . 1.0 . .
    N N1A 0.3202(3) 0.44461(10) 0.86702(16) 0.0196(7) Uani d . . . 1.0 . .
    N N2A 0.3209(4) 0.50062(11) 0.74185(17) 0.0206(7) Uani d . . . 1.0 . .
    H H2NA 0.280(5) 0.4745(15) 0.744(2) 0.031 Uiso d U . . 1.0 . .
    N N3A 0.1952(4) 0.35627(11) 0.86274(18) 0.0232(7) Uani d . . . 1.0 . .
    H H3NA 0.194(5) 0.3740(15) 0.828(2) 0.029(12) Uiso d . . . 1.0 . .
    N N4A 0.1653(4) 0.50676(12) 0.62576(18) 0.0225(7) Uani d . . . 1.0 . .
    H H4NA 0.154(5) 0.4794(16) 0.631(2) 0.029(12) Uiso d . . . 1.0 . .
    N N5A 0.1332(4) 0.29957(11) 0.77455(19) 0.0245(8) Uani d . . . 1.0 . .
    H H5NA 0.130(5) 0.3197(16) 0.746(2) 0.033(14) Uiso d . . . 1.0 . .
    C C1A 0.4661(5) 0.54727(16) 1.2029(2) 0.0404(11) Uani d . . . 1.0 . .
    H H1A1 0.5151 0.5225 1.2369 0.061 Uiso calc U . R 1.0 . .
    H H1A2 0.382 0.5629 1.2253 0.061 Uiso calc U . R 1.0 . .
    H H1A3 0.5487 0.57 1.1954 0.061 Uiso calc U . R 1.0 . .
    C C2A 0.3929(5) 0.52628(14) 1.1279(2) 0.0290(9) Uani d . . . 1.0 . .
    H H2A1 0.3373 0.5511 1.095 0.035 Uiso calc U . R 1.0 . .
    H H2A2 0.3117 0.5027 1.1359 0.035 Uiso calc U . R 1.0 . .
    C C3A 0.5189(4) 0.50347(14) 1.0888(2) 0.0261(9) Uani d . . . 1.0 . .
    H H3A1 0.6019 0.5269 1.0825 0.031 Uiso calc U . R 1.0 . .
    H H3A2 0.5723 0.4782 1.1214 0.031 Uiso calc U . R 1.0 . .
    C C4A 0.4511(4) 0.48346(12) 1.0129(2) 0.0208(8) Uani d . . . 1.0 . .
    C C5A 0.3737(4) 0.44016(12) 1.00379(19) 0.0194(8) Uani d . . . 1.0 . .
    C C6A 0.2542(4) 0.36016(12) 1.0039(2) 0.0221(8) Uani d . . . 1.0 . .
    H H6A 0.2159 0.3303 1.0153 0.027 Uiso calc U . R 1.0 . .
    C C7A 0.3153(4) 0.42206(12) 0.9316(2) 0.0194(8) Uani d . . . 1.0 . .
    C C8A 0.2508(4) 0.37617(12) 0.9329(2) 0.0202(8) Uani d . . . 1.0 . .
    C C9A 0.1611(4) 0.31008(13) 0.8501(2) 0.0226(8) Uani d . . . 1.0 . .
    C C10A 0.0788(4) 0.25619(12) 0.7429(2) 0.0209(8) Uani d . . . 1.0 . .
    C C11A 0.1143(5) 0.21400(13) 0.7803(2) 0.0266(9) Uani d . . . 1.0 . .
    H H11A 0.1795 0.2135 0.8289 0.032 Uiso calc U . R 1.0 . .
    C C12A 0.0546(5) 0.17275(13) 0.7466(2) 0.0294(9) Uani d . . . 1.0 . .
    H H12A 0.0764 0.1438 0.7721 0.035 Uiso calc U . R 1.0 . .
    C C13A -0.0360(5) 0.17425(13) 0.6761(2) 0.0278(9) Uani d . . . 1.0 . .
    C C14A -0.0668(4) 0.21465(14) 0.6365(2) 0.0274(9) Uani d . . . 1.0 . .
    H H14A -0.1261 0.2144 0.5866 0.033 Uiso calc U . R 1.0 . .
    C C15A -0.0099(4) 0.25620(13) 0.6706(2) 0.0244(8) Uani d . . . 1.0 . .
    H H15A -0.0318 0.2848 0.6442 0.029 Uiso calc U . R 1.0 . .
    C C16A 0.4566(4) 0.50651(12) 0.9453(2) 0.0213(8) Uani d . . . 1.0 . .
    C C17A 0.4744(4) 0.55723(13) 0.8335(2) 0.0250(8) Uani d . . . 1.0 . .
    H H17A 0.4919 0.581 0.7989 0.03 Uiso calc U . R 1.0 . .
    C C18A 0.3879(4) 0.48699(12) 0.8753(2) 0.0190(8) Uani d . . . 1.0 . .
    C C19A 0.3960(4) 0.51659(12) 0.8127(2) 0.0213(8) Uani d . . . 1.0 . .
    C C20A 0.2694(4) 0.52874(13) 0.6812(2) 0.0207(8) Uani d . . . 1.0 . .
    C C21A 0.0754(4) 0.52779(13) 0.5608(2) 0.0199(8) Uani d . . . 1.0 . .
    C C22A 0.0427(5) 0.57533(13) 0.5564(2) 0.0268(9) Uani d . . . 1.0 . .
    H H22A 0.0827 0.5952 0.5977 0.032 Uiso calc U . R 1.0 . .
    C C23A -0.0482(5) 0.59367(14) 0.4919(2) 0.0306(9) Uani d . . . 1.0 . .
    H H23A -0.0707 0.6262 0.4883 0.037 Uiso calc U . R 1.0 . .
    C C24A -0.1056(4) 0.56449(15) 0.4332(2) 0.0274(9) Uani d . . . 1.0 . .
    C C25A -0.0761(4) 0.51753(14) 0.4357(2) 0.0258(9) Uani d . . . 1.0 . .
    H H25A -0.1176 0.4979 0.3943 0.031 Uiso calc U . R 1.0 . .
    C C26A 0.0163(4) 0.49937(13) 0.5005(2) 0.0219(8) Uani d . . . 1.0 . .
    H H26A 0.0393 0.4669 0.5034 0.026 Uiso calc U . R 1.0 . .
    N N6A 0.6563(4) 0.42853(11) 0.61490(18) 0.0268(7) Uani d . . . 1.0 . .
    C C27A 0.5792(4) 0.39801(15) 0.6681(2) 0.0286(8) Uani d . . . 1.0 . .
    H H27A 0.5288 0.4187 0.7015 0.034 Uiso calc U . R 1.0 . .
    H H27B 0.4917 0.3798 0.6375 0.034 Uiso calc U . R 1.0 . .
    C C28A 0.6883(5) 0.36419(15) 0.7173(2) 0.0341(10) Uani d . . . 1.0 . .
    H H28A 0.7696 0.3817 0.7528 0.041 Uiso calc U . R 1.0 . .
    H H28B 0.7456 0.3443 0.6855 0.041 Uiso calc U . R 1.0 . .
    C C29A 0.5881(5) 0.33389(16) 0.7612(2) 0.0384(10) Uani d . . . 1.0 . .
    H H29A 0.5368 0.354 0.7951 0.046 Uiso calc U . R 1.0 . .
    H H29B 0.5014 0.3187 0.7253 0.046 Uiso calc U . R 1.0 . .
    C C30A 0.6874(6) 0.29660(17) 0.8078(2) 0.0453(12) Uani d . . . 1.0 . .
    H H30A 0.6192 0.2796 0.8376 0.068 Uiso calc U . R 1.0 . .
    H H30B 0.7766 0.3113 0.8417 0.068 Uiso calc U . R 1.0 . .
    H H30C 0.7303 0.2748 0.7741 0.068 Uiso calc U . R 1.0 . .
    C C31A 0.7501(4) 0.39931(14) 0.5666(2) 0.0276(8) Uani d . . . 1.0 . .
    H H31A 0.7895 0.4204 0.53 0.033 Uiso calc U . R 1.0 . .
    H H31B 0.8459 0.3865 0.5999 0.033 Uiso calc U . R 1.0 . .
    C C32A 0.6626(5) 0.35928(14) 0.5231(2) 0.0315(9) Uani d . . . 1.0 . .
    H H32A 0.5739 0.3714 0.4847 0.038 Uiso calc U . R 1.0 . .
    H H32B 0.6156 0.3386 0.5578 0.038 Uiso calc U . R 1.0 . .
    C C33A 0.7811(5) 0.33193(15) 0.4848(2) 0.0334(10) Uani d . . . 1.0 . .
    H H33A 0.8206 0.3524 0.4475 0.04 Uiso calc U . R 1.0 . .
    H H33B 0.8748 0.3231 0.5232 0.04 Uiso calc U . R 1.0 . .
    C C34A 0.7092(5) 0.28806(16) 0.4450(3) 0.0456(12) Uani d . . . 1.0 . .
    H H34A 0.7919 0.2717 0.4228 0.068 Uiso calc U . R 1.0 . .
    H H34B 0.6198 0.2966 0.405 0.068 Uiso calc U . R 1.0 . .
    H H34C 0.6695 0.2676 0.4815 0.068 Uiso calc U . R 1.0 . .
    C C35A 0.5188(4) 0.45440(14) 0.5662(2) 0.0296(9) Uani d . . . 1.0 . .
    H H35A 0.4448 0.431 0.5387 0.036 Uiso calc U . R 1.0 . .
    H H35B 0.4582 0.4716 0.6001 0.036 Uiso calc U . R 1.0 . .
    C C36A 0.5645(4) 0.48845(14) 0.5094(2) 0.0311(9) Uani d . . . 1.0 . .
    H H36A 0.6058 0.4713 0.4689 0.037 Uiso calc U . R 1.0 . .
    H H36B 0.6506 0.5095 0.5343 0.037 Uiso calc U . R 1.0 . .
    C C37A 0.4176(4) 0.51691(15) 0.4757(2) 0.0304(9) Uani d . . . 1.0 . .
    H H37A 0.3852 0.5367 0.5157 0.036 Uiso calc U . R 1.0 . .
    H H37B 0.3274 0.4954 0.4576 0.036 Uiso calc U . R 1.0 . .
    C C38A 0.4473(5) 0.54789(16) 0.4105(2) 0.0373(10) Uani d . . . 1.0 . .
    H H38A 0.3503 0.5662 0.3922 0.056 Uiso calc U . R 1.0 . .
    H H38B 0.4733 0.5284 0.3694 0.056 Uiso calc U . R 1.0 . .
    H H38C 0.5373 0.569 0.4279 0.056 Uiso calc U . R 1.0 . .
    C C39A 0.7760(4) 0.46232(13) 0.6582(2) 0.0278(9) Uani d . . . 1.0 . .
    H H39A 0.8339 0.4781 0.6217 0.033 Uiso calc U . R 1.0 . .
    H H39B 0.8564 0.444 0.6929 0.033 Uiso calc U . R 1.0 . .
    C C40A 0.7083(5) 0.49985(15) 0.7043(2) 0.0337(10) Uani d . . . 1.0 . .
    H H40A 0.6334 0.5201 0.6702 0.04 Uiso calc U . R 1.0 . .
    H H40B 0.6473 0.485 0.7403 0.04 Uiso calc U . R 1.0 . .
    C C41A 0.8439(5) 0.52924(15) 0.7472(2) 0.0343(10) Uani d . . . 1.0 . .
    H H41A 0.9193 0.5375 0.7126 0.041 Uiso calc U . R 1.0 . .
    H H41B 0.7979 0.5586 0.7632 0.041 Uiso calc U . R 1.0 . .
    C C42A 0.9369(6) 0.50572(17) 0.8156(3) 0.0465(12) Uani d . . . 1.0 . .
    H H42A 1.0231 0.5264 0.8396 0.07 Uiso calc U . R 1.0 . .
    H H42B 0.9838 0.4766 0.8005 0.07 Uiso calc U . R 1.0 . .
    H H42C 0.8645 0.4987 0.8514 0.07 Uiso calc U . R 1.0 . .
    Cl Cl1B 0.18479(9) 0.31073(3) 0.18142(5) 0.01975(19) Uani d . . . 1.0 . .
    S S1B 0.43627(19) 0.13890(4) 0.44545(6) 0.0260(4) Uani d . P D 0.840(4) A
     1
    S S2B 0.2548(2) 0.30773(4) 0.57027(7) 0.0191(3) Uani d . P D 0.840(4) A 1
    N N1B 0.2905(3) 0.26122(10) 0.37061(16) 0.0200(7) Uani d . P D 0.840(4) A
     1
    C C1B 0.5497(7) 0.1776(2) 0.7158(3) 0.0392(14) Uani d . P D 0.840(4) A 1
    H H1B1 0.4906 0.1967 0.7471 0.059 Uiso calc U P R 0.840(4) A 1
    H H1B2 0.6637 0.1764 0.7389 0.059 Uiso calc U P R 0.840(4) A 1
    H H1B3 0.5053 0.1459 0.712 0.059 Uiso calc U P R 0.840(4) A 1
    C C2B 0.5336(5) 0.19899(17) 0.6370(3) 0.0311(12) Uani d . P D 0.840(4) A 1
    H H2B1 0.5699 0.2319 0.6414 0.037 Uiso calc U P R 0.840(4) A 1
    H H2B2 0.6041 0.1819 0.6076 0.037 Uiso calc U P R 0.840(4) A 1
    C C3B 0.3622(5) 0.19714(15) 0.5956(2) 0.0226(10) Uani d . P D 0.840(4) A 1
    H H3B1 0.3275 0.1641 0.5902 0.027 Uiso calc U P R 0.840(4) A 1
    H H3B2 0.2916 0.2132 0.6262 0.027 Uiso calc U P R 0.840(4) A 1
    C C4B 0.3406(6) 0.21921(14) 0.5189(2) 0.0206(10) Uani d . P D 0.840(4) A 1
    C C5B 0.3676(7) 0.19569(14) 0.4542(2) 0.0213(10) Uani d . P D 0.840(4) A 1
    C C6B 0.4168(10) 0.14465(19) 0.3472(3) 0.026(2) Uani d . P D 0.840(4) A 1
    H H6B 0.4416 0.1204 0.315 0.031 Uiso calc U P R 0.840(4) A 1
    C C7B 0.3424(4) 0.21750(12) 0.3830(2) 0.0234(8) Uani d . P D 0.840(4) A 1
    C C8B 0.3635(4) 0.18687(13) 0.3221(2) 0.0223(8) Uani d . P D 0.840(4) A 1
    C C16B 0.2928(8) 0.26561(15) 0.5057(2) 0.0198(13) Uani d . P D 0.840(4) A
     1
    C C17B 0.2136(4) 0.34932(13) 0.4997(2) 0.0220(8) Uani d . P D 0.840(4) A 1
    H H17B 0.1865 0.3807 0.5088 0.026 Uiso calc U P R 0.840(4) A 1
    C C18B 0.2743(4) 0.28457(13) 0.4330(2) 0.0222(8) Uani d . P D 0.840(4) A 1
    C C19B 0.2238(4) 0.33265(12) 0.43049(19) 0.0190(8) Uani d . P D 0.840(4) A
     1
    S S1D 0.5311(11) 0.1474(2) 0.4413(4) 0.030(2) Uiso d . P D 0.160(4) A 2
    S S2D 0.3183(13) 0.3093(4) 0.5749(5) 0.035(3) Uiso d . P D 0.160(4) A 2
    N N1D 0.2905(3) 0.26122(10) 0.37061(16) 0.0200(7) Uani d . P D 0.160(4) A
     2
    C C1D 0.462(4) 0.1697(12) 0.7178(14) 0.040(8) Uiso d . P D 0.160(4) A 2
    H H1D1 0.384 0.1558 0.7459 0.061 Uiso calc U P R 0.160(4) A 2
    H H1D2 0.5122 0.1969 0.7454 0.061 Uiso calc U P R 0.160(4) A 2
    H H1D3 0.5452 0.1467 0.7122 0.061 Uiso calc U P R 0.160(4) A 2
    C C2D 0.375(3) 0.1851(11) 0.6391(14) 0.043(8) Uiso d . P D 0.160(4) A 2
    H H2D1 0.3239 0.1578 0.611 0.052 Uiso calc U P R 0.160(4) A 2
    H H2D2 0.29 0.2081 0.6445 0.052 Uiso calc U P R 0.160(4) A 2
    C C3D 0.496(3) 0.2070(9) 0.5958(12) 0.030(7) Uiso d . P D 0.160(4) A 2
    H H3D1 0.5508 0.233 0.6263 0.036 Uiso calc U P R 0.160(4) A 2
    H H3D2 0.5795 0.1834 0.5905 0.036 Uiso calc U P R 0.160(4) A 2
    C C4D 0.430(3) 0.2252(7) 0.5197(10) 0.026(6) Uiso d . P D 0.160(4) A 2
    C C5D 0.441(3) 0.2021(7) 0.4521(10) 0.026(8) Uiso d . P D 0.160(4) A 2
    C C6D 0.444(4) 0.1476(10) 0.3458(15) 0.07(3) Uiso d . P D 0.160(4) A 2
    H H6D 0.4521 0.1219 0.3133 0.085 Uiso calc U P R 0.160(4) A 2
    C C7D 0.3424(4) 0.21750(12) 0.3830(2) 0.0234(8) Uani d . P D 0.160(4) A 2
    C C8D 0.3635(4) 0.18687(13) 0.3221(2) 0.0223(8) Uani d . P D 0.160(4) A 2
    C C16D 0.348(3) 0.2687(7) 0.5052(11) 0.021(10) Uiso d . P D 0.160(4) A 2
    C C17D 0.2136(4) 0.34932(13) 0.4997(2) 0.0220(8) Uani d . P D 0.160(4) A 2
    H H17D 0.1606 0.3774 0.5091 0.026 Uiso calc U P R 0.160(4) A 2
    C C18D 0.2743(4) 0.28457(13) 0.4330(2) 0.0222(8) Uani d . P D 0.160(4) A 2
    C C19D 0.2238(4) 0.33265(12) 0.43049(19) 0.0190(8) Uani d . P D 0.160(4) A
     2
    F F1B -0.1838(3) 0.12901(8) -0.13118(12) 0.0373(6) Uani d . . . 1.0 . .
    F F2B -0.1189(3) 0.56975(7) 0.12995(12) 0.0346(5) Uani d . . . 1.0 . .
    O O1B 0.2910(3) 0.13520(9) 0.18791(14) 0.0281(6) Uani d . . . 1.0 . .
    O O2B 0.1364(3) 0.42598(9) 0.39452(14) 0.0303(6) Uani d . . . 1.0 . .
    N N2B 0.1957(4) 0.35292(11) 0.35970(17) 0.0232(8) Uani d . . . 1.0 . .
    H H2NB 0.213(5) 0.3377(16) 0.329(2) 0.035 Uiso d U . . 1.0 . .
    N N3B 0.3169(3) 0.20474(11) 0.24930(16) 0.0208(7) Uani d . . . 1.0 . .
    H H3NB 0.286(4) 0.2353(14) 0.2458(19) 0.016(9) Uiso d . . . 1.0 . .
    N N4B 0.1414(4) 0.40955(11) 0.26974(18) 0.0236(7) Uani d . . . 1.0 . .
    H H4NB 0.145(4) 0.3869(14) 0.241(2) 0.018(10) Uiso d . . . 1.0 . .
    N N5B 0.1686(3) 0.20022(12) 0.13058(17) 0.0191(7) Uani d . . . 1.0 . .
    H H5NB 0.165(5) 0.2283(17) 0.137(2) 0.033(13) Uiso d . . . 1.0 . .
    C C9B 0.2607(4) 0.17665(12) 0.1887(2) 0.0198(8) Uani d . . . 1.0 . .
    C C10B 0.0800(4) 0.18021(12) 0.06484(19) 0.0184(8) Uani d . . . 1.0 . .
    C C11B 0.0357(4) 0.13344(14) 0.0600(2) 0.0257(9) Uani d . . . 1.0 . .
    H H11B 0.0667 0.1132 0.1018 0.031 Uiso calc U . R 1.0 . .
    C C12B -0.0541(5) 0.11658(14) -0.0063(2) 0.0295(9) Uani d . . . 1.0 . .
    H H12B -0.0847 0.0846 -0.0103 0.035 Uiso calc U . R 1.0 . .
    C C13B -0.0984(4) 0.14610(14) -0.0660(2) 0.0265(9) Uani d . . . 1.0 . .
    C C14B -0.0572(4) 0.19258(14) -0.0622(2) 0.0233(8) Uani d . . . 1.0 . .
    H H14B -0.0901 0.2126 -0.1041 0.028 Uiso calc U . R 1.0 . .
    C C15B 0.0327(4) 0.20953(13) 0.0033(2) 0.0208(8) Uani d . . . 1.0 . .
    H H15B 0.0627 0.2415 0.0066 0.025 Uiso calc U . R 1.0 . .
    C C20B 0.1556(4) 0.39864(13) 0.34470(19) 0.0216(8) Uani d . . . 1.0 . .
    C C21B 0.0800(4) 0.45134(13) 0.2359(2) 0.0220(8) Uani d . . . 1.0 . .
    C C22B 0.0890(4) 0.49347(13) 0.2746(2) 0.0264(9) Uani d . . . 1.0 . .
    H H22B 0.1408 0.4949 0.3258 0.032 Uiso calc U . R 1.0 . .
    C C23B 0.0224(4) 0.53341(13) 0.2386(2) 0.0267(9) Uani d . . . 1.0 . .
    H H23B 0.0266 0.5622 0.265 0.032 Uiso calc U . R 1.0 . .
    C C24B -0.0493(4) 0.53081(13) 0.1648(2) 0.0254(9) Uani d . . . 1.0 . .
    C C25B -0.0552(4) 0.48992(13) 0.1240(2) 0.0240(8) Uani d . . . 1.0 . .
    H H25B -0.1024 0.4892 0.0721 0.029 Uiso calc U . R 1.0 . .
    C C26B 0.0090(4) 0.45033(13) 0.1603(2) 0.0235(8) Uani d . . . 1.0 . .
    H H26B 0.0048 0.4217 0.1333 0.028 Uiso calc U . R 1.0 . .
    N N6B 0.6818(3) 0.27481(12) 0.1333(2) 0.0313(8) Uani d . . . 1.0 . .
    C C27B 0.5444(4) 0.24916(14) 0.0847(3) 0.0348(10) Uani d . . . 1.0 . .
    H H27C 0.4817 0.2328 0.1186 0.042 Uiso calc U . R 1.0 . .
    H H27D 0.4724 0.2727 0.0562 0.042 Uiso calc U . R 1.0 . .
    C C28B 0.5893(5) 0.21389(14) 0.0290(3) 0.0378(11) Uani d . . . 1.0 . .
    H H28C 0.6665 0.191 0.0557 0.045 Uiso calc U . R 1.0 . .
    H H28D 0.6415 0.23 -0.0092 0.045 Uiso calc U . R 1.0 . .
    C C29B 0.4386(5) 0.18886(15) -0.0096(3) 0.0360(10) Uani d . . . 1.0 . .
    H H29C 0.3933 0.1705 0.0286 0.043 Uiso calc U . R 1.0 . .
    H H29D 0.3573 0.2124 -0.0307 0.043 Uiso calc U . R 1.0 . .
    C C30B 0.4689(5) 0.15650(16) -0.0722(2) 0.0409(11) Uani d . . . 1.0 . .
    H H30D 0.3679 0.1413 -0.0946 0.061 Uiso calc U . R 1.0 . .
    H H30E 0.5479 0.1327 -0.0516 0.061 Uiso calc U . R 1.0 . .
    H H30F 0.5107 0.1745 -0.111 0.061 Uiso calc U . R 1.0 . .
    C C31B 0.7846(4) 0.29982(14) 0.0846(2) 0.0304(9) Uani d . . . 1.0 . .
    H H31C 0.8276 0.2762 0.0531 0.036 Uiso calc U . R 1.0 . .
    H H31D 0.8776 0.3138 0.1182 0.036 Uiso calc U . R 1.0 . .
    C C32B 0.7047(4) 0.33786(14) 0.0329(2) 0.0306(9) Uani d . . . 1.0 . .
    H H32C 0.6572 0.3616 0.0625 0.037 Uiso calc U . R 1.0 . .
    H H32D 0.6175 0.3244 -0.0049 0.037 Uiso calc U . R 1.0 . .
    C C33B 0.8313(5) 0.36032(14) -0.0068(2) 0.0299(9) Uani d . . . 1.0 . .
    H H33C 0.9224 0.3709 0.0318 0.036 Uiso calc U . R 1.0 . .
    H H33D 0.873 0.3365 -0.0384 0.036 Uiso calc U . R 1.0 . .
    C C34B 0.7688(5) 0.40145(16) -0.0560(2) 0.0420(10) Uani d . . . 1.0 . .
    H H34D 0.8554 0.4139 -0.0803 0.063 Uiso calc U . R 1.0 . .
    H H34E 0.7312 0.4258 -0.0248 0.063 Uiso calc U . R 1.0 . .
    H H34F 0.6794 0.3913 -0.0947 0.063 Uiso calc U . R 1.0 . .
    C C35B 0.6059(4) 0.30837(15) 0.1811(2) 0.0309(9) Uani d . . . 1.0 . .
    H H35C 0.5506 0.2899 0.2156 0.037 Uiso calc U . R 1.0 . .
    H H35D 0.5221 0.3261 0.1474 0.037 Uiso calc U . R 1.0 . .
    C C36B 0.7159(5) 0.34341(15) 0.2285(2) 0.0364(10) Uani d . . . 1.0 . .
    H H36C 0.7732 0.3625 0.1956 0.044 Uiso calc U . R 1.0 . .
    H H36D 0.7971 0.3267 0.2653 0.044 Uiso calc U . R 1.0 . .
    C C37B 0.6141(5) 0.37486(16) 0.2703(2) 0.0383(11) Uani d . . . 1.0 . .
    H H37C 0.5204 0.3863 0.234 0.046 Uiso calc U . R 1.0 . .
    H H37D 0.5725 0.3562 0.3091 0.046 Uiso calc U . R 1.0 . .
    C C38B 0.7052(6) 0.41625(18) 0.3078(3) 0.0502(13) Uani d . . . 1.0 . .
    H H38D 0.6344 0.4345 0.3346 0.075 Uiso calc U . R 1.0 . .
    H H38E 0.7421 0.4358 0.2694 0.075 Uiso calc U . R 1.0 . .
    H H38F 0.7983 0.4053 0.3437 0.075 Uiso calc U . R 1.0 . .
    C C39B 0.7949(5) 0.24123(15) 0.1822(3) 0.0422(12) Uani d . P . 0.537(15) B
     1
    H H39C 0.8678 0.2269 0.1509 0.051 Uiso calc U P R 0.537(15) B 1
    H H39D 0.8621 0.2592 0.2229 0.051 Uiso calc U P R 0.537(15) B 1
    C C40B 0.7103(12) 0.2032(4) 0.2171(8) 0.034(3) Uani d . P . 0.537(15) B 1
    H H40C 0.6851 0.1766 0.1821 0.04 Uiso calc U P R 0.537(15) B 1
    H H40D 0.6094 0.2148 0.2318 0.04 Uiso calc U P R 0.537(15) B 1
    C C41B 0.8529(16) 0.1871(4) 0.2978(8) 0.039(3) Uani d . P . 0.537(15) B 1
    H H41C 0.933 0.2118 0.3146 0.047 Uiso calc U P R 0.537(15) B 1
    H H41D 0.8021 0.1763 0.3405 0.047 Uiso calc U P R 0.537(15) B 1
    C C42B 0.9200(14) 0.1473(4) 0.2561(5) 0.044(3) Uani d . P . 0.537(15) B 1
    H H42D 0.9974 0.1293 0.2917 0.066 Uiso calc U P R 0.537(15) B 1
    H H42E 0.9741 0.1602 0.2165 0.066 Uiso calc U P R 0.537(15) B 1
    H H42F 0.8317 0.1269 0.2332 0.066 Uiso calc U P R 0.537(15) B 1
    C C39D 0.7949(5) 0.24123(15) 0.1822(3) 0.0422(12) Uani d . P . 0.463(15) B
     2
    H H39E 0.8937 0.2585 0.204 0.051 Uiso calc U P R 0.463(15) B 2
    H H39F 0.8267 0.2164 0.1494 0.051 Uiso calc U P R 0.463(15) B 2
    C C40D 0.7221(14) 0.2166(4) 0.2509(7) 0.024(3) Uani d . P . 0.463(15) B 2
    H H40E 0.607 0.2082 0.2364 0.029 Uiso calc U P R 0.463(15) B 2
    H H40F 0.738 0.2358 0.2974 0.029 Uiso calc U P R 0.463(15) B 2
    C C41D 0.8436(15) 0.1698(5) 0.2582(7) 0.029(3) Uani d . P . 0.463(15) B 2
    H H41E 0.7903 0.1402 0.2682 0.035 Uiso calc U P R 0.463(15) B 2
    H H41F 0.9042 0.1663 0.216 0.035 Uiso calc U P R 0.463(15) B 2
    C C42D 0.9392(19) 0.1925(4) 0.3282(8) 0.048(3) Uani d . P . 0.463(15) B 2
    H H42G 0.9891 0.2213 0.3139 0.072 Uiso calc U P R 0.463(15) B 2
    H H42H 1.0232 0.1709 0.3519 0.072 Uiso calc U P R 0.463(15) B 2
    H H42I 0.867 0.1998 0.3639 0.072 Uiso calc U P R 0.463(15) B 2

loop_
    _atom_site_aniso_label
    _atom_site_aniso_U_11
    _atom_site_aniso_U_22
    _atom_site_aniso_U_33
    _atom_site_aniso_U_12
    _atom_site_aniso_U_13
    _atom_site_aniso_U_23
    Cl1A 0.0255(4) 0.0153(4) 0.0221(4) -0.0007(4) 0.0031(3) -0.0003(4)
    S1A 0.0276(5) 0.0212(5) 0.0206(5) 0.0037(4) 0.0050(4) 0.0033(4)
    S2A 0.0338(5) 0.0205(5) 0.0277(5) -0.0098(4) 0.0050(4) -0.0055(4)
    F1A 0.0475(14) 0.0262(13) 0.0426(14) -0.0112(11) 0.0069(11) -0.0112(11)
    F2A 0.0354(13) 0.0421(15) 0.0320(14) 0.0025(11) -0.0025(11) 0.0088(11)
    O1A 0.0584(18) 0.0149(14) 0.0265(15) -0.0063(13) 0.0119(14) 0.0025(13)
    O2A 0.0329(14) 0.0154(14) 0.0306(15) -0.0079(11) 0.0050(12) 0.0018(11)
    N1A 0.0222(16) 0.0155(16) 0.0216(17) 0.0006(12) 0.0052(13) -0.0001(13)
    N2A 0.0287(17) 0.0141(16) 0.0187(17) -0.0070(13) 0.0034(13) -0.0009(14)
    N3A 0.0344(19) 0.0147(17) 0.0194(18) -0.0028(13) 0.0018(15) 0.0029(15)
    N4A 0.0300(18) 0.0131(18) 0.0246(19) -0.0007(14) 0.0056(14) -0.0006(14)
    N5A 0.0362(19) 0.0160(19) 0.0222(19) -0.0053(14) 0.0071(15) 0.0021(15)
    C1A 0.053(3) 0.041(3) 0.027(2) -0.001(2) 0.006(2) -0.010(2)
    C2A 0.031(2) 0.028(2) 0.028(2) -0.0020(17) 0.0044(17) -0.0056(17)
    C3A 0.026(2) 0.027(2) 0.024(2) -0.0010(16) -0.0014(16) -0.0049(17)
    C4A 0.0171(18) 0.0197(19) 0.026(2) 0.0011(14) 0.0035(15) -0.0037(15)
    C5A 0.0195(18) 0.0183(19) 0.0203(19) 0.0058(14) 0.0033(15) 0.0029(15)
    C6A 0.0231(19) 0.0153(18) 0.029(2) 0.0032(14) 0.0062(16) 0.0034(16)
    C7A 0.0191(18) 0.0174(19) 0.022(2) 0.0017(14) 0.0060(15) -0.0016(16)
    C8A 0.0202(18) 0.0171(18) 0.023(2) 0.0032(15) 0.0033(15) 0.0007(16)
    C9A 0.0249(19) 0.0156(19) 0.028(2) -0.0010(16) 0.0069(16) -0.0013(18)
    C10A 0.0228(19) 0.018(2) 0.024(2) -0.0019(15) 0.0105(16) -0.0024(16)
    C11A 0.039(2) 0.018(2) 0.022(2) -0.0012(16) 0.0058(17) -0.0014(16)
    C12A 0.045(2) 0.017(2) 0.028(2) -0.0014(17) 0.0102(19) 0.0027(17)
    C13A 0.032(2) 0.019(2) 0.035(2) -0.0074(17) 0.0125(18) -0.0082(18)
    C14A 0.023(2) 0.035(2) 0.025(2) -0.0008(17) 0.0051(16) -0.0039(18)
    C15A 0.026(2) 0.020(2) 0.029(2) 0.0024(16) 0.0084(17) 0.0023(17)
    C16A 0.0190(18) 0.0178(19) 0.027(2) -0.0015(14) 0.0046(16) -0.0014(16)
    C17A 0.030(2) 0.019(2) 0.026(2) -0.0066(16) 0.0060(16) -0.0020(16)
    C18A 0.0188(17) 0.0165(19) 0.0228(19) -0.0021(14) 0.0065(15) -0.0051(15)
    C19A 0.0216(19) 0.018(2) 0.026(2) -0.0010(15) 0.0083(16) -0.0010(16)
    C20A 0.0207(19) 0.021(2) 0.022(2) 0.0013(15) 0.0077(16) 0.0000(16)
    C21A 0.0188(18) 0.022(2) 0.021(2) -0.0008(15) 0.0098(15) 0.0003(16)
    C22A 0.038(2) 0.020(2) 0.022(2) 0.0038(17) 0.0043(17) -0.0032(17)
    C23A 0.038(2) 0.022(2) 0.033(2) 0.0056(18) 0.0070(19) 0.0052(19)
    C24A 0.025(2) 0.032(2) 0.024(2) 0.0020(17) 0.0034(17) 0.0072(19)
    C25A 0.0210(19) 0.033(2) 0.024(2) -0.0017(16) 0.0066(16) -0.0029(18)
    C26A 0.0228(19) 0.019(2) 0.026(2) -0.0010(15) 0.0108(16) -0.0020(17)
    N6A 0.0216(16) 0.0278(18) 0.0321(18) 0.0015(13) 0.0080(14) -0.0046(14)
    C27A 0.0240(19) 0.030(2) 0.034(2) 0.0006(17) 0.0117(16) -0.0029(19)
    C28A 0.033(2) 0.036(2) 0.033(2) 0.0022(18) 0.0045(19) -0.0041(19)
    C29A 0.039(2) 0.046(3) 0.031(2) -0.001(2) 0.0073(19) 0.000(2)
    C30A 0.054(3) 0.050(3) 0.032(3) -0.001(2) 0.006(2) 0.000(2)
    C31A 0.0231(19) 0.029(2) 0.033(2) 0.0037(17) 0.0123(16) -0.0029(19)
    C32A 0.029(2) 0.037(2) 0.031(2) 0.0000(17) 0.0086(18) -0.0092(18)
    C33A 0.029(2) 0.042(3) 0.030(2) 0.0078(18) 0.0072(18) -0.005(2)
    C34A 0.045(3) 0.046(3) 0.045(3) 0.012(2) 0.005(2) -0.015(2)
    C35A 0.0196(19) 0.033(2) 0.037(2) 0.0011(16) 0.0064(17) -0.0045(18)
    C36A 0.025(2) 0.040(3) 0.030(2) 0.0012(18) 0.0096(17) -0.0068(19)
    C37A 0.022(2) 0.037(2) 0.032(2) -0.0007(17) 0.0041(17) -0.0042(19)
    C38A 0.034(2) 0.045(3) 0.033(2) 0.0050(19) 0.0042(19) -0.001(2)
    C39A 0.0198(19) 0.030(2) 0.034(2) 0.0021(16) 0.0051(17) -0.0043(18)
    C40A 0.026(2) 0.034(2) 0.043(3) 0.0011(17) 0.0093(19) -0.008(2)
    C41A 0.029(2) 0.029(2) 0.046(3) 0.0003(18) 0.012(2) -0.011(2)
    C42A 0.044(3) 0.046(3) 0.046(3) 0.001(2) -0.002(2) -0.010(2)
    Cl1B 0.0221(4) 0.0162(4) 0.0203(4) 0.0022(4) 0.0019(3) -0.0002(4)
    S1B 0.0378(10) 0.0164(6) 0.0231(6) 0.0090(5) 0.0029(5) 0.0034(5)
    S2B 0.0238(9) 0.0175(6) 0.0165(6) 0.0002(6) 0.0054(5) -0.0009(4)
    N1B 0.0266(16) 0.0144(16) 0.0180(16) 0.0029(13) 0.0007(13) 0.0012(13)
    C1B 0.038(3) 0.054(4) 0.023(3) 0.006(3) -0.002(2) 0.018(2)
    C2B 0.027(3) 0.036(3) 0.029(3) 0.004(2) 0.000(2) 0.008(2)
    C3B 0.027(3) 0.019(2) 0.023(3) -0.0003(19) 0.008(2) 0.001(2)
    C4B 0.019(3) 0.022(2) 0.021(2) -0.0007(18) 0.0033(19) 0.0030(18)
    C5B 0.023(3) 0.015(2) 0.025(3) 0.0035(19) 0.002(2) 0.0033(18)
    C6B 0.042(3) 0.019(3) 0.016(3) 0.015(2) 0.000(2) -0.0032(19)
    C7B 0.031(2) 0.017(2) 0.0202(19) 0.0058(15) 0.0006(16) 0.0001(16)
    C8B 0.0282(19) 0.0180(19) 0.0203(19) 0.0050(15) 0.0024(16) 0.0000(15)
    C16B 0.021(3) 0.022(3) 0.018(3) 0.001(2) 0.006(2) 0.0009(18)
    C17B 0.0243(19) 0.0178(19) 0.025(2) -0.0017(15) 0.0059(16) 0.0003(16)
    C18B 0.0239(19) 0.0195(19) 0.023(2) -0.0005(15) 0.0048(16) -0.0012(17)
    C19B 0.0204(18) 0.0153(18) 0.021(2) -0.0004(14) 0.0029(15) -0.0032(16)
    N1D 0.0266(16) 0.0144(16) 0.0180(16) 0.0029(13) 0.0007(13) 0.0012(13)
    C7D 0.031(2) 0.017(2) 0.0202(19) 0.0058(15) 0.0006(16) 0.0001(16)
    C8D 0.0282(19) 0.0180(19) 0.0203(19) 0.0050(15) 0.0024(16) 0.0000(15)
    C17D 0.0243(19) 0.0178(19) 0.025(2) -0.0017(15) 0.0059(16) 0.0003(16)
    C18D 0.0239(19) 0.0195(19) 0.023(2) -0.0005(15) 0.0048(16) -0.0012(17)
    C19D 0.0204(18) 0.0153(18) 0.021(2) -0.0004(14) 0.0029(15) -0.0032(16)
    F1B 0.0372(13) 0.0435(15) 0.0283(13) -0.0074(11) -0.0025(10) -0.0070(11)
    F2B 0.0387(13) 0.0230(12) 0.0403(13) 0.0079(10) 0.0012(11) 0.0111(10)
    O1B 0.0358(15) 0.0169(15) 0.0301(15) 0.0086(11) 0.0014(12) -0.0053(12)
    O2B 0.0519(17) 0.0177(14) 0.0211(14) 0.0067(12) 0.0055(13) -0.0035(12)
    N2B 0.0365(19) 0.0151(17) 0.0177(18) 0.0068(14) 0.0033(15) -0.0026(14)
    N3B 0.0272(16) 0.0153(18) 0.0194(17) 0.0047(13) 0.0027(13) -0.0024(13)
    N4B 0.0371(19) 0.0116(17) 0.0212(17) 0.0046(13) 0.0020(14) -0.0031(14)
    N5B 0.0219(16) 0.0142(18) 0.0213(17) 0.0008(13) 0.0036(13) -0.0010(14)
    C9B 0.0204(18) 0.017(2) 0.023(2) 0.0025(15) 0.0064(16) 0.0000(16)
    C10B 0.0147(17) 0.023(2) 0.0192(19) 0.0023(15) 0.0059(15) -0.0010(16)
    C11B 0.029(2) 0.022(2) 0.026(2) -0.0011(17) 0.0034(17) -0.0018(17)
    C12B 0.035(2) 0.020(2) 0.033(2) -0.0041(17) 0.0039(18) -0.0048(19)
    C13B 0.0218(19) 0.038(3) 0.020(2) -0.0016(17) 0.0026(16) -0.0086(18)
    C14B 0.0214(19) 0.028(2) 0.022(2) 0.0028(16) 0.0068(16) 0.0045(17)
    C15B 0.0151(17) 0.020(2) 0.029(2) -0.0008(14) 0.0088(16) -0.0008(17)
    C20B 0.0233(18) 0.0169(19) 0.024(2) 0.0017(16) 0.0023(15) -0.0025(18)
    C21B 0.0225(19) 0.020(2) 0.025(2) 0.0032(15) 0.0065(16) 0.0000(16)
    C22B 0.032(2) 0.021(2) 0.025(2) -0.0013(16) 0.0016(17) -0.0011(17)
    C23B 0.034(2) 0.015(2) 0.031(2) 0.0033(16) 0.0047(18) -0.0004(17)
    C24B 0.027(2) 0.019(2) 0.031(2) 0.0039(16) 0.0073(18) 0.0076(17)
    C25B 0.0241(19) 0.025(2) 0.023(2) 0.0017(16) 0.0029(16) 0.0043(17)
    C26B 0.026(2) 0.024(2) 0.021(2) 0.0018(16) 0.0038(16) -0.0005(16)
    N6B 0.0153(15) 0.0273(19) 0.053(2) 0.0024(13) 0.0092(15) 0.0077(16)
    C27B 0.0133(19) 0.027(2) 0.065(3) -0.0025(15) 0.0084(19) 0.003(2)
    C28B 0.023(2) 0.029(2) 0.065(3) 0.0013(17) 0.015(2) 0.002(2)
    C29B 0.025(2) 0.030(2) 0.055(3) 0.0009(17) 0.013(2) 0.005(2)
    C30B 0.039(3) 0.040(3) 0.044(3) -0.001(2) 0.011(2) 0.007(2)
    C31B 0.0189(19) 0.027(2) 0.047(3) 0.0007(16) 0.0118(17) 0.0029(19)
    C32B 0.0212(19) 0.029(2) 0.042(2) 0.0029(17) 0.0073(18) -0.0017(19)
    C33B 0.029(2) 0.033(2) 0.029(2) -0.0049(17) 0.0068(18) -0.0086(18)
    C34B 0.045(3) 0.041(3) 0.045(3) -0.005(2) 0.020(2) -0.001(2)
    C35B 0.0189(18) 0.035(2) 0.040(2) 0.0054(18) 0.0085(16) 0.012(2)
    C36B 0.026(2) 0.038(3) 0.046(3) -0.0023(19) 0.0086(19) 0.011(2)
    C37B 0.037(2) 0.049(3) 0.026(2) -0.002(2) -0.0001(19) 0.004(2)
    C38B 0.046(3) 0.060(3) 0.043(3) -0.003(2) 0.004(2) -0.001(2)
    C39B 0.020(2) 0.035(3) 0.071(3) 0.0087(18) 0.009(2) 0.019(2)
    C40B 0.021(4) 0.037(7) 0.042(8) 0.004(4) 0.002(5) 0.010(5)
    C41B 0.039(8) 0.043(7) 0.036(8) 0.014(6) 0.011(7) 0.012(5)
    C42B 0.041(6) 0.035(6) 0.064(6) 0.015(5) 0.029(5) 0.019(5)
    C39D 0.020(2) 0.035(3) 0.071(3) 0.0087(18) 0.009(2) 0.019(2)
    C40D 0.026(5) 0.029(6) 0.013(6) -0.003(4) -0.005(5) -0.002(4)
    C41D 0.030(7) 0.023(7) 0.037(7) -0.001(6) 0.010(6) 0.009(5)
    C42D 0.050(8) 0.041(6) 0.047(8) -0.004(6) -0.007(6) 0.016(6)

_geom_special_details                   
;
All esds (except the esd in the dihedral angle between two l.s. planes)
are estimated using the full covariance matrix.  The cell esds are taken
into account individually in the estimation of esds in distances, angles
and torsion angles; correlations between esds in cell parameters are only
used when they are defined by crystal symmetry.  An approximate (isotropic)
treatment of cell esds is used for estimating esds involving l.s. planes.
;

loop_
    _geom_bond_atom_site_label_1
    _geom_bond_atom_site_label_2
    _geom_bond_site_symmetry_2
    _geom_bond_distance
    _geom_bond_publ_flag
    S1A C5A . 1.740(4) ?
    S1A C6A . 1.750(4) ?
    S2A C17A . 1.741(4) ?
    S2A C16A . 1.747(4) ?
    F1A C13A . 1.365(4) ?
    F2A C24A . 1.367(4) ?
    O1A C9A . 1.213(4) ?
    O2A C20A . 1.225(4) ?
    N1A C7A . 1.336(4) ?
    N1A C18A . 1.339(4) ?
    N2A C20A . 1.366(5) ?
    N2A C19A . 1.400(5) ?
    N2A H2NA . 0.83(4) ?
    N3A C9A . 1.365(5) ?
    N3A C8A . 1.392(5) ?
    N3A H3NA . 0.80(4) ?
    N4A C20A . 1.365(5) ?
    N4A C21A . 1.415(5) ?
    N4A H4NA . 0.80(4) ?
    N5A C9A . 1.372(5) ?
    N5A C10A . 1.411(5) ?
    N5A H5NA . 0.77(4) ?
    C1A C2A . 1.510(5) ?
    C1A H1A1 . 0.98 ?
    C1A H1A2 . 0.98 ?
    C1A H1A3 . 0.98 ?
    C2A C3A . 1.518(5) ?
    C2A H2A1 . 0.99 ?
    C2A H2A2 . 0.99 ?
    C3A C4A . 1.501(5) ?
    C3A H3A1 . 0.99 ?
    C3A H3A2 . 0.99 ?
    C4A C16A . 1.390(5) ?
    C4A C5A . 1.398(5) ?
    C5A C7A . 1.406(5) ?
    C6A C8A . 1.352(5) ?
    C6A H6A . 0.95 ?
    C7A C8A . 1.424(5) ?
    C10A C15A . 1.386(5) ?
    C10A C11A . 1.391(5) ?
    C11A C12A . 1.384(5) ?
    C11A H11A . 0.95 ?
    C12A C13A . 1.365(5) ?
    C12A H12A . 0.95 ?
    C13A C14A . 1.361(5) ?
    C14A C15A . 1.386(5) ?
    C14A H14A . 0.95 ?
    C15A H15A . 0.95 ?
    C16A C18A . 1.408(5) ?
    C17A C19A . 1.359(5) ?
    C17A H17A . 0.95 ?
    C18A C19A . 1.421(5) ?
    C21A C26A . 1.379(5) ?
    C21A C22A . 1.389(5) ?
    C22A C23A . 1.380(5) ?
    C22A H22A . 0.95 ?
    C23A C24A . 1.369(6) ?
    C23A H23A . 0.95 ?
    C24A C25A . 1.367(6) ?
    C25A C26A . 1.388(5) ?
    C25A H25A . 0.95 ?
    C26A H26A . 0.95 ?
    N6A C39A . 1.515(5) ?
    N6A C27A . 1.521(5) ?
    N6A C31A . 1.521(5) ?
    N6A C35A . 1.521(5) ?
    C27A C28A . 1.514(6) ?
    C27A H27A . 0.99 ?
    C27A H27B . 0.99 ?
    C28A C29A . 1.522(6) ?
    C28A H28A . 0.99 ?
    C28A H28B . 0.99 ?
    C29A C30A . 1.518(6) ?
    C29A H29A . 0.99 ?
    C29A H29B . 0.99 ?
    C30A H30A . 0.98 ?
    C30A H30B . 0.98 ?
    C30A H30C . 0.98 ?
    C31A C32A . 1.509(5) ?
    C31A H31A . 0.99 ?
    C31A H31B . 0.99 ?
    C32A C33A . 1.523(5) ?
    C32A H32A . 0.99 ?
    C32A H32B . 0.99 ?
    C33A C34A . 1.521(6) ?
    C33A H33A . 0.99 ?
    C33A H33B . 0.99 ?
    C34A H34A . 0.98 ?
    C34A H34B . 0.98 ?
    C34A H34C . 0.98 ?
    C35A C36A . 1.509(6) ?
    C35A H35A . 0.99 ?
    C35A H35B . 0.99 ?
    C36A C37A . 1.519(5) ?
    C36A H36A . 0.99 ?
    C36A H36B . 0.99 ?
    C37A C38A . 1.525(6) ?
    C37A H37A . 0.99 ?
    C37A H37B . 0.99 ?
    C38A H38A . 0.98 ?
    C38A H38B . 0.98 ?
    C38A H38C . 0.98 ?
    C39A C40A . 1.526(5) ?
    C39A H39A . 0.99 ?
    C39A H39B . 0.99 ?
    C40A C41A . 1.521(6) ?
    C40A H40A . 0.99 ?
    C40A H40B . 0.99 ?
    C41A C42A . 1.501(6) ?
    C41A H41A . 0.99 ?
    C41A H41B . 0.99 ?
    C42A H42A . 0.98 ?
    C42A H42B . 0.98 ?
    C42A H42C . 0.98 ?
    S1B C5B . 1.743(4) ?
    S1B C6B . 1.754(5) ?
    S2B C17B . 1.732(4) ?
    S2B C16B . 1.742(4) ?
    N1B C7B . 1.333(5) ?
    N1B C18B . 1.333(4) ?
    C1B C2B . 1.529(6) ?
    C1B H1B1 . 0.98 ?
    C1B H1B2 . 0.98 ?
    C1B H1B3 . 0.98 ?
    C2B C3B . 1.510(6) ?
    C2B H2B1 . 0.99 ?
    C2B H2B2 . 0.99 ?
    C3B C4B . 1.500(6) ?
    C3B H3B1 . 0.99 ?
    C3B H3B2 . 0.99 ?
    C4B C5B . 1.396(6) ?
    C4B C16B . 1.398(6) ?
    C5B C7B . 1.408(5) ?
    C6B C8B . 1.341(6) ?
    C6B H6B . 0.95 ?
    C7B C8B . 1.437(5) ?
    C8B N3B . 1.399(5) ?
    C16B C18B . 1.399(5) ?
    C17B C19B . 1.349(5) ?
    C17B H17B . 0.95 ?
    C18B C19B . 1.440(5) ?
    C19B N2B . 1.383(5) ?
    S1D C6D . 1.75(2) ?
    S1D C5D . 1.767(18) ?
    S2D C16D . 1.756(19) ?
    C1D C2D . 1.54(2) ?
    C1D H1D1 . 0.98 ?
    C1D H1D2 . 0.98 ?
    C1D H1D3 . 0.98 ?
    C2D C3D . 1.52(2) ?
    C2D H2D1 . 0.99 ?
    C2D H2D2 . 0.99 ?
    C3D C4D . 1.48(2) ?
    C3D H3D1 . 0.99 ?
    C3D H3D2 . 0.99 ?
    C4D C5D . 1.40(2) ?
    C4D C16D . 1.43(2) ?
    C6D H6D . 0.95 ?
    F1B C13B . 1.359(4) ?
    F2B C24B . 1.362(4) ?
    O1B C9B . 1.215(4) ?
    O2B C20B . 1.221(4) ?
    N2B C20B . 1.368(5) ?
    N2B H2NB . 0.74(4) ?
    N3B C9B . 1.373(5) ?
    N3B H3NB . 0.91(4) ?
    N4B C20B . 1.369(5) ?
    N4B C21B . 1.402(5) ?
    N4B H4NB . 0.83(4) ?
    N5B C9B . 1.369(5) ?
    N5B C10B . 1.409(5) ?
    N5B H5NB . 0.81(5) ?
    C10B C11B . 1.389(5) ?
    C10B C15B . 1.392(5) ?
    C11B C12B . 1.386(5) ?
    C11B H11B . 0.95 ?
    C12B C13B . 1.367(5) ?
    C12B H12B . 0.95 ?
    C13B C14B . 1.375(5) ?
    C14B C15B . 1.377(5) ?
    C14B H14B . 0.95 ?
    C15B H15B . 0.95 ?
    C21B C22B . 1.389(5) ?
    C21B C26B . 1.389(5) ?
    C22B C23B . 1.385(5) ?
    C22B H22B . 0.95 ?
    C23B C24B . 1.364(5) ?
    C23B H23B . 0.95 ?
    C24B C25B . 1.378(5) ?
    C25B C26B . 1.373(5) ?
    C25B H25B . 0.95 ?
    C26B H26B . 0.95 ?
    N6B C35B . 1.503(5) ?
    N6B C31B . 1.513(5) ?
    N6B C27B . 1.516(5) ?
    N6B C39B . 1.524(5) ?
    C27B C28B . 1.516(6) ?
    C27B H27C . 0.99 ?
    C27B H27D . 0.99 ?
    C28B C29B . 1.520(6) ?
    C28B H28C . 0.99 ?
    C28B H28D . 0.99 ?
    C29B C30B . 1.514(6) ?
    C29B H29C . 0.99 ?
    C29B H29D . 0.99 ?
    C30B H30D . 0.98 ?
    C30B H30E . 0.98 ?
    C30B H30F . 0.98 ?
    C31B C32B . 1.514(5) ?
    C31B H31C . 0.99 ?
    C31B H31D . 0.99 ?
    C32B C33B . 1.523(5) ?
    C32B H32C . 0.99 ?
    C32B H32D . 0.99 ?
    C33B C34B . 1.513(6) ?
    C33B H33C . 0.99 ?
    C33B H33D . 0.99 ?
    C34B H34D . 0.98 ?
    C34B H34E . 0.98 ?
    C34B H34F . 0.98 ?
    C35B C36B . 1.526(6) ?
    C35B H35C . 0.99 ?
    C35B H35D . 0.99 ?
    C36B C37B . 1.526(6) ?
    C36B H36C . 0.99 ?
    C36B H36D . 0.99 ?
    C37B C38B . 1.508(6) ?
    C37B H37C . 0.99 ?
    C37B H37D . 0.99 ?
    C38B H38D . 0.98 ?
    C38B H38E . 0.98 ?
    C38B H38F . 0.98 ?
    C39B C40B . 1.496(11) ?
    C39B H39C . 0.99 ?
    C39B H39D . 0.99 ?
    C40B C41B . 1.781(15) ?
    C40B H40C . 0.99 ?
    C40B H40D . 0.99 ?
    C41B C42B . 1.525(15) ?
    C41B H41C . 0.99 ?
    C41B H41D . 0.99 ?
    C42B H42D . 0.98 ?
    C42B H42E . 0.98 ?
    C42B H42F . 0.98 ?
    C40D C41D . 1.678(17) ?
    C40D H40E . 0.99 ?
    C40D H40F . 0.99 ?
    C41D C42D . 1.520(17) ?
    C41D H41E . 0.99 ?
    C41D H41F . 0.99 ?
    C42D H42G . 0.98 ?
    C42D H42H . 0.98 ?
    C42D H42I . 0.98 ?

loop_
    _geom_angle_atom_site_label_1
    _geom_angle_atom_site_label_2
    _geom_angle_atom_site_label_3
    _geom_angle_site_symmetry_1
    _geom_angle_site_symmetry_3
    _geom_angle
    _geom_angle_publ_flag
    C5A S1A C6A . . 91.67(17) ?
    C17A S2A C16A . . 91.82(17) ?
    C7A N1A C18A . . 114.6(3) ?
    C20A N2A C19A . . 124.6(3) ?
    C20A N2A H2NA . . 119.(3) ?
    C19A N2A H2NA . . 113.(3) ?
    C9A N3A C8A . . 125.3(3) ?
    C9A N3A H3NA . . 121.(3) ?
    C8A N3A H3NA . . 114.(3) ?
    C20A N4A C21A . . 126.5(3) ?
    C20A N4A H4NA . . 117.(3) ?
    C21A N4A H4NA . . 117.(3) ?
    C9A N5A C10A . . 125.6(3) ?
    C9A N5A H5NA . . 118.(3) ?
    C10A N5A H5NA . . 115.(3) ?
    C2A C1A H1A1 . . 109.5 ?
    C2A C1A H1A2 . . 109.5 ?
    H1A1 C1A H1A2 . . 109.5 ?
    C2A C1A H1A3 . . 109.5 ?
    H1A1 C1A H1A3 . . 109.5 ?
    H1A2 C1A H1A3 . . 109.5 ?
    C1A C2A C3A . . 111.9(3) ?
    C1A C2A H2A1 . . 109.2 ?
    C3A C2A H2A1 . . 109.2 ?
    C1A C2A H2A2 . . 109.2 ?
    C3A C2A H2A2 . . 109.2 ?
    H2A1 C2A H2A2 . . 107.9 ?
    C4A C3A C2A . . 113.4(3) ?
    C4A C3A H3A1 . . 108.9 ?
    C2A C3A H3A1 . . 108.9 ?
    C4A C3A H3A2 . . 108.9 ?
    C2A C3A H3A2 . . 108.9 ?
    H3A1 C3A H3A2 . . 107.7 ?
    C16A C4A C5A . . 113.8(3) ?
    C16A C4A C3A . . 123.3(3) ?
    C5A C4A C3A . . 122.9(3) ?
    C4A C5A C7A . . 121.2(3) ?
    C4A C5A S1A . . 129.0(3) ?
    C7A C5A S1A . . 109.8(3) ?
    C8A C6A S1A . . 112.4(3) ?
    C8A C6A H6A . . 123.8 ?
    S1A C6A H6A . . 123.8 ?
    N1A C7A C5A . . 124.5(3) ?
    N1A C7A C8A . . 121.9(3) ?
    C5A C7A C8A . . 113.6(3) ?
    C6A C8A N3A . . 131.8(3) ?
    C6A C8A C7A . . 112.4(3) ?
    N3A C8A C7A . . 115.7(3) ?
    O1A C9A N3A . . 122.7(3) ?
    O1A C9A N5A . . 125.4(4) ?
    N3A C9A N5A . . 111.9(3) ?
    C15A C10A C11A . . 119.5(3) ?
    C15A C10A N5A . . 117.7(3) ?
    C11A C10A N5A . . 122.8(3) ?
    C12A C11A C10A . . 119.8(4) ?
    C12A C11A H11A . . 120.1 ?
    C10A C11A H11A . . 120.1 ?
    C13A C12A C11A . . 119.0(4) ?
    C13A C12A H12A . . 120.5 ?
    C11A C12A H12A . . 120.5 ?
    C14A C13A C12A . . 122.7(4) ?
    C14A C13A F1A . . 118.5(3) ?
    C12A C13A F1A . . 118.9(3) ?
    C13A C14A C15A . . 118.6(4) ?
    C13A C14A H14A . . 120.7 ?
    C15A C14A H14A . . 120.7 ?
    C10A C15A C14A . . 120.4(4) ?
    C10A C15A H15A . . 119.8 ?
    C14A C15A H15A . . 119.8 ?
    C4A C16A C18A . . 121.5(3) ?
    C4A C16A S2A . . 129.0(3) ?
    C18A C16A S2A . . 109.5(3) ?
    C19A C17A S2A . . 112.6(3) ?
    C19A C17A H17A . . 123.7 ?
    S2A C17A H17A . . 123.7 ?
    N1A C18A C16A . . 124.2(3) ?
    N1A C18A C19A . . 122.0(3) ?
    C16A C18A C19A . . 113.8(3) ?
    C17A C19A N2A . . 130.8(3) ?
    C17A C19A C18A . . 112.3(3) ?
    N2A C19A C18A . . 116.8(3) ?
    O2A C20A N4A . . 124.6(3) ?
    O2A C20A N2A . . 122.5(3) ?
    N4A C20A N2A . . 112.9(3) ?
    C26A C21A C22A . . 119.5(3) ?
    C26A C21A N4A . . 118.0(3) ?
    C22A C21A N4A . . 122.5(3) ?
    C23A C22A C21A . . 119.8(4) ?
    C23A C22A H22A . . 120.1 ?
    C21A C22A H22A . . 120.1 ?
    C24A C23A C22A . . 119.2(4) ?
    C24A C23A H23A . . 120.4 ?
    C22A C23A H23A . . 120.4 ?
    F2A C24A C25A . . 118.7(3) ?
    F2A C24A C23A . . 118.8(4) ?
    C25A C24A C23A . . 122.5(4) ?
    C24A C25A C26A . . 118.0(4) ?
    C24A C25A H25A . . 121.0 ?
    C26A C25A H25A . . 121.0 ?
    C21A C26A C25A . . 121.0(4) ?
    C21A C26A H26A . . 119.5 ?
    C25A C26A H26A . . 119.5 ?
    C39A N6A C27A . . 111.3(3) ?
    C39A N6A C31A . . 106.2(3) ?
    C27A N6A C31A . . 111.2(3) ?
    C39A N6A C35A . . 111.1(3) ?
    C27A N6A C35A . . 106.1(3) ?
    C31A N6A C35A . . 111.0(3) ?
    C28A C27A N6A . . 116.9(3) ?
    C28A C27A H27A . . 108.1 ?
    N6A C27A H27A . . 108.1 ?
    C28A C27A H27B . . 108.1 ?
    N6A C27A H27B . . 108.1 ?
    H27A C27A H27B . . 107.3 ?
    C27A C28A C29A . . 109.4(3) ?
    C27A C28A H28A . . 109.8 ?
    C29A C28A H28A . . 109.8 ?
    C27A C28A H28B . . 109.8 ?
    C29A C28A H28B . . 109.8 ?
    H28A C28A H28B . . 108.2 ?
    C30A C29A C28A . . 112.7(4) ?
    C30A C29A H29A . . 109.1 ?
    C28A C29A H29A . . 109.1 ?
    C30A C29A H29B . . 109.1 ?
    C28A C29A H29B . . 109.1 ?
    H29A C29A H29B . . 107.8 ?
    C29A C30A H30A . . 109.5 ?
    C29A C30A H30B . . 109.5 ?
    H30A C30A H30B . . 109.5 ?
    C29A C30A H30C . . 109.5 ?
    H30A C30A H30C . . 109.5 ?
    H30B C30A H30C . . 109.5 ?
    C32A C31A N6A . . 117.3(3) ?
    C32A C31A H31A . . 108.0 ?
    N6A C31A H31A . . 108.0 ?
    C32A C31A H31B . . 108.0 ?
    N6A C31A H31B . . 108.0 ?
    H31A C31A H31B . . 107.2 ?
    C31A C32A C33A . . 108.9(3) ?
    C31A C32A H32A . . 109.9 ?
    C33A C32A H32A . . 109.9 ?
    C31A C32A H32B . . 109.9 ?
    C33A C32A H32B . . 109.9 ?
    H32A C32A H32B . . 108.3 ?
    C34A C33A C32A . . 113.5(3) ?
    C34A C33A H33A . . 108.9 ?
    C32A C33A H33A . . 108.9 ?
    C34A C33A H33B . . 108.9 ?
    C32A C33A H33B . . 108.9 ?
    H33A C33A H33B . . 107.7 ?
    C33A C34A H34A . . 109.5 ?
    C33A C34A H34B . . 109.5 ?
    H34A C34A H34B . . 109.5 ?
    C33A C34A H34C . . 109.5 ?
    H34A C34A H34C . . 109.5 ?
    H34B C34A H34C . . 109.5 ?
    C36A C35A N6A . . 116.6(3) ?
    C36A C35A H35A . . 108.1 ?
    N6A C35A H35A . . 108.1 ?
    C36A C35A H35B . . 108.1 ?
    N6A C35A H35B . . 108.1 ?
    H35A C35A H35B . . 107.3 ?
    C35A C36A C37A . . 109.4(3) ?
    C35A C36A H36A . . 109.8 ?
    C37A C36A H36A . . 109.8 ?
    C35A C36A H36B . . 109.8 ?
    C37A C36A H36B . . 109.8 ?
    H36A C36A H36B . . 108.2 ?
    C36A C37A C38A . . 112.9(3) ?
    C36A C37A H37A . . 109.0 ?
    C38A C37A H37A . . 109.0 ?
    C36A C37A H37B . . 109.0 ?
    C38A C37A H37B . . 109.0 ?
    H37A C37A H37B . . 107.8 ?
    C37A C38A H38A . . 109.5 ?
    C37A C38A H38B . . 109.5 ?
    H38A C38A H38B . . 109.5 ?
    C37A C38A H38C . . 109.5 ?
    H38A C38A H38C . . 109.5 ?
    H38B C38A H38C . . 109.5 ?
    N6A C39A C40A . . 116.8(3) ?
    N6A C39A H39A . . 108.1 ?
    C40A C39A H39A . . 108.1 ?
    N6A C39A H39B . . 108.1 ?
    C40A C39A H39B . . 108.1 ?
    H39A C39A H39B . . 107.3 ?
    C41A C40A C39A . . 110.3(3) ?
    C41A C40A H40A . . 109.6 ?
    C39A C40A H40A . . 109.6 ?
    C41A C40A H40B . . 109.6 ?
    C39A C40A H40B . . 109.6 ?
    H40A C40A H40B . . 108.1 ?
    C42A C41A C40A . . 114.2(4) ?
    C42A C41A H41A . . 108.7 ?
    C40A C41A H41A . . 108.7 ?
    C42A C41A H41B . . 108.7 ?
    C40A C41A H41B . . 108.7 ?
    H41A C41A H41B . . 107.6 ?
    C41A C42A H42A . . 109.5 ?
    C41A C42A H42B . . 109.5 ?
    H42A C42A H42B . . 109.5 ?
    C41A C42A H42C . . 109.5 ?
    H42A C42A H42C . . 109.5 ?
    H42B C42A H42C . . 109.5 ?
    C5B S1B C6B . . 91.6(2) ?
    C17B S2B C16B . . 91.43(19) ?
    C7B N1B C18B . . 114.1(3) ?
    C2B C1B H1B1 . . 109.5 ?
    C2B C1B H1B2 . . 109.5 ?
    H1B1 C1B H1B2 . . 109.5 ?
    C2B C1B H1B3 . . 109.5 ?
    H1B1 C1B H1B3 . . 109.5 ?
    H1B2 C1B H1B3 . . 109.5 ?
    C3B C2B C1B . . 111.7(4) ?
    C3B C2B H2B1 . . 109.3 ?
    C1B C2B H2B1 . . 109.3 ?
    C3B C2B H2B2 . . 109.3 ?
    C1B C2B H2B2 . . 109.3 ?
    H2B1 C2B H2B2 . . 107.9 ?
    C4B C3B C2B . . 113.3(4) ?
    C4B C3B H3B1 . . 108.9 ?
    C2B C3B H3B1 . . 108.9 ?
    C4B C3B H3B2 . . 108.9 ?
    C2B C3B H3B2 . . 108.9 ?
    H3B1 C3B H3B2 . . 107.7 ?
    C5B C4B C16B . . 113.6(4) ?
    C5B C4B C3B . . 123.4(4) ?
    C16B C4B C3B . . 122.9(4) ?
    C4B C5B C7B . . 121.5(4) ?
    C4B C5B S1B . . 129.0(3) ?
    C7B C5B S1B . . 109.5(3) ?
    C8B C6B S1B . . 113.1(3) ?
    C8B C6B H6B . . 123.5 ?
    S1B C6B H6B . . 123.5 ?
    N1B C7B C5B . . 124.3(3) ?
    N1B C7B C8B . . 121.7(3) ?
    C5B C7B C8B . . 113.7(3) ?
    C6B C8B N3B . . 132.0(4) ?
    C6B C8B C7B . . 111.9(3) ?
    N3B C8B C7B . . 116.0(3) ?
    C4B C16B C18B . . 120.7(4) ?
    C4B C16B S2B . . 128.7(3) ?
    C18B C16B S2B . . 110.5(3) ?
    C19B C17B S2B . . 113.3(3) ?
    C19B C17B H17B . . 123.3 ?
    S2B C17B H17B . . 123.3 ?
    N1B C18B C16B . . 125.5(4) ?
    N1B C18B C19B . . 121.7(3) ?
    C16B C18B C19B . . 112.7(3) ?
    C17B C19B N2B . . 132.3(3) ?
    C17B C19B C18B . . 112.0(3) ?
    N2B C19B C18B . . 115.7(3) ?
    C6D S1D C5D . . 89.3(10) ?
    C2D C1D H1D1 . . 109.5 ?
    C2D C1D H1D2 . . 109.5 ?
    H1D1 C1D H1D2 . . 109.5 ?
    C2D C1D H1D3 . . 109.5 ?
    H1D1 C1D H1D3 . . 109.5 ?
    H1D2 C1D H1D3 . . 109.5 ?
    C3D C2D C1D . . 109.(2) ?
    C3D C2D H2D1 . . 109.8 ?
    C1D C2D H2D1 . . 109.8 ?
    C3D C2D H2D2 . . 109.8 ?
    C1D C2D H2D2 . . 109.8 ?
    H2D1 C2D H2D2 . . 108.2 ?
    C4D C3D C2D . . 116.(2) ?
    C4D C3D H3D1 . . 108.4 ?
    C2D C3D H3D1 . . 108.4 ?
    C4D C3D H3D2 . . 108.4 ?
    C2D C3D H3D2 . . 108.4 ?
    H3D1 C3D H3D2 . . 107.4 ?
    C5D C4D C16D . . 110.9(15) ?
    C5D C4D C3D . . 124.3(17) ?
    C16D C4D C3D . . 124.8(17) ?
    C4D C5D S1D . . 127.5(14) ?
    S1D C6D H6D . . 122.6 ?
    C4D C16D S2D . . 124.8(14) ?
    C20B N2B C19B . . 125.6(3) ?
    C20B N2B H2NB . . 119.(4) ?
    C19B N2B H2NB . . 115.(4) ?
    C9B N3B C8B . . 122.2(3) ?
    C9B N3B H3NB . . 117.(2) ?
    C8B N3B H3NB . . 117.(2) ?
    C20B N4B C21B . . 125.9(3) ?
    C20B N4B H4NB . . 115.(2) ?
    C21B N4B H4NB . . 117.(3) ?
    C9B N5B C10B . . 126.2(3) ?
    C9B N5B H5NB . . 114.(3) ?
    C10B N5B H5NB . . 120.(3) ?
    O1B C9B N5B . . 124.5(3) ?
    O1B C9B N3B . . 122.5(3) ?
    N5B C9B N3B . . 113.0(3) ?
    C11B C10B C15B . . 119.6(3) ?
    C11B C10B N5B . . 123.0(3) ?
    C15B C10B N5B . . 117.4(3) ?
    C12B C11B C10B . . 119.5(4) ?
    C12B C11B H11B . . 120.3 ?
    C10B C11B H11B . . 120.3 ?
    C13B C12B C11B . . 119.7(4) ?
    C13B C12B H12B . . 120.1 ?
    C11B C12B H12B . . 120.1 ?
    F1B C13B C12B . . 119.2(3) ?
    F1B C13B C14B . . 118.9(3) ?
    C12B C13B C14B . . 121.9(3) ?
    C13B C14B C15B . . 118.7(4) ?
    C13B C14B H14B . . 120.6 ?
    C15B C14B H14B . . 120.6 ?
    C14B C15B C10B . . 120.6(3) ?
    C14B C15B H15B . . 119.7 ?
    C10B C15B H15B . . 119.7 ?
    O2B C20B N2B . . 121.9(3) ?
    O2B C20B N4B . . 125.1(3) ?
    N2B C20B N4B . . 113.0(3) ?
    C22B C21B C26B . . 119.1(3) ?
    C22B C21B N4B . . 122.7(3) ?
    C26B C21B N4B . . 118.2(3) ?
    C23B C22B C21B . . 120.0(4) ?
    C23B C22B H22B . . 120.0 ?
    C21B C22B H22B . . 120.0 ?
    C24B C23B C22B . . 119.1(4) ?
    C24B C23B H23B . . 120.4 ?
    C22B C23B H23B . . 120.4 ?
    F2B C24B C23B . . 119.2(3) ?
    F2B C24B C25B . . 118.5(3) ?
    C23B C24B C25B . . 122.3(3) ?
    C26B C25B C24B . . 118.2(3) ?
    C26B C25B H25B . . 120.9 ?
    C24B C25B H25B . . 120.9 ?
    C25B C26B C21B . . 121.2(4) ?
    C25B C26B H26B . . 119.4 ?
    C21B C26B H26B . . 119.4 ?
    C35B N6B C31B . . 111.7(3) ?
    C35B N6B C27B . . 106.4(3) ?
    C31B N6B C27B . . 110.6(3) ?
    C35B N6B C39B . . 111.1(3) ?
    C31B N6B C39B . . 105.6(3) ?
    C27B N6B C39B . . 111.6(3) ?
    C28B C27B N6B . . 116.9(3) ?
    C28B C27B H27C . . 108.1 ?
    N6B C27B H27C . . 108.1 ?
    C28B C27B H27D . . 108.1 ?
    N6B C27B H27D . . 108.1 ?
    H27C C27B H27D . . 107.3 ?
    C27B C28B C29B . . 109.4(3) ?
    C27B C28B H28C . . 109.8 ?
    C29B C28B H28C . . 109.8 ?
    C27B C28B H28D . . 109.8 ?
    C29B C28B H28D . . 109.8 ?
    H28C C28B H28D . . 108.2 ?
    C30B C29B C28B . . 113.2(3) ?
    C30B C29B H29C . . 108.9 ?
    C28B C29B H29C . . 108.9 ?
    C30B C29B H29D . . 108.9 ?
    C28B C29B H29D . . 108.9 ?
    H29C C29B H29D . . 107.7 ?
    C29B C30B H30D . . 109.5 ?
    C29B C30B H30E . . 109.5 ?
    H30D C30B H30E . . 109.5 ?
    C29B C30B H30F . . 109.5 ?
    H30D C30B H30F . . 109.5 ?
    H30E C30B H30F . . 109.5 ?
    N6B C31B C32B . . 117.2(3) ?
    N6B C31B H31C . . 108.0 ?
    C32B C31B H31C . . 108.0 ?
    N6B C31B H31D . . 108.0 ?
    C32B C31B H31D . . 108.0 ?
    H31C C31B H31D . . 107.2 ?
    C31B C32B C33B . . 108.5(3) ?
    C31B C32B H32C . . 110.0 ?
    C33B C32B H32C . . 110.0 ?
    C31B C32B H32D . . 110.0 ?
    C33B C32B H32D . . 110.0 ?
    H32C C32B H32D . . 108.4 ?
    C34B C33B C32B . . 113.6(3) ?
    C34B C33B H33C . . 108.8 ?
    C32B C33B H33C . . 108.8 ?
    C34B C33B H33D . . 108.8 ?
    C32B C33B H33D . . 108.8 ?
    H33C C33B H33D . . 107.7 ?
    C33B C34B H34D . . 109.5 ?
    C33B C34B H34E . . 109.5 ?
    H34D C34B H34E . . 109.5 ?
    C33B C34B H34F . . 109.5 ?
    H34D C34B H34F . . 109.5 ?
    H34E C34B H34F . . 109.5 ?
    N6B C35B C36B . . 117.6(3) ?
    N6B C35B H35C . . 107.9 ?
    C36B C35B H35C . . 107.9 ?
    N6B C35B H35D . . 107.9 ?
    C36B C35B H35D . . 107.9 ?
    H35C C35B H35D . . 107.2 ?
    C35B C36B C37B . . 108.9(3) ?
    C35B C36B H36C . . 109.9 ?
    C37B C36B H36C . . 109.9 ?
    C35B C36B H36D . . 109.9 ?
    C37B C36B H36D . . 109.9 ?
    H36C C36B H36D . . 108.3 ?
    C38B C37B C36B . . 113.4(4) ?
    C38B C37B H37C . . 108.9 ?
    C36B C37B H37C . . 108.9 ?
    C38B C37B H37D . . 108.9 ?
    C36B C37B H37D . . 108.9 ?
    H37C C37B H37D . . 107.7 ?
    C37B C38B H38D . . 109.5 ?
    C37B C38B H38E . . 109.5 ?
    H38D C38B H38E . . 109.5 ?
    C37B C38B H38F . . 109.5 ?
    H38D C38B H38F . . 109.5 ?
    H38E C38B H38F . . 109.5 ?
    C40B C39B N6B . . 113.9(5) ?
    C40B C39B H39C . . 108.8 ?
    N6B C39B H39C . . 108.8 ?
    C40B C39B H39D . . 108.8 ?
    N6B C39B H39D . . 108.8 ?
    H39C C39B H39D . . 107.7 ?
    C39B C40B C41B . . 103.1(7) ?
    C39B C40B H40C . . 111.1 ?
    C41B C40B H40C . . 111.1 ?
    C39B C40B H40D . . 111.1 ?
    C41B C40B H40D . . 111.1 ?
    H40C C40B H40D . . 109.1 ?
    C42B C41B C40B . . 92.8(9) ?
    C42B C41B H41C . . 113.1 ?
    C40B C41B H41C . . 113.1 ?
    C42B C41B H41D . . 113.1 ?
    C40B C41B H41D . . 113.1 ?
    H41C C41B H41D . . 110.5 ?
    C41B C42B H42D . . 109.5 ?
    C41B C42B H42E . . 109.5 ?
    H42D C42B H42E . . 109.5 ?
    C41B C42B H42F . . 109.5 ?
    H42D C42B H42F . . 109.5 ?
    H42E C42B H42F . . 109.5 ?
    C41D C40D H40E . . 112.6 ?
    C41D C40D H40F . . 112.6 ?
    H40E C40D H40F . . 110.1 ?
    C42D C41D C40D . . 87.4(10) ?
    C42D C41D H41E . . 114.1 ?
    C40D C41D H41E . . 114.1 ?
    C42D C41D H41F . . 114.1 ?
    C40D C41D H41F . . 114.1 ?
    H41E C41D H41F . . 111.3 ?
    C41D C42D H42G . . 109.5 ?
    C41D C42D H42H . . 109.5 ?
    H42G C42D H42H . . 109.5 ?
    C41D C42D H42I . . 109.5 ?
    H42G C42D H42I . . 109.5 ?
    H42H C42D H42I . . 109.5 ?

loop_
    _geom_torsion_atom_site_label_1
    _geom_torsion_atom_site_label_2
    _geom_torsion_atom_site_label_3
    _geom_torsion_atom_site_label_4
    _geom_torsion_site_symmetry_1
    _geom_torsion_site_symmetry_2
    _geom_torsion_site_symmetry_3
    _geom_torsion_site_symmetry_4
    _geom_torsion
    _geom_torsion_publ_flag
    C1A C2A C3A C4A . . . . -178.3(3) ?
    C2A C3A C4A C16A . . . . 98.4(4) ?
    C2A C3A C4A C5A . . . . -80.4(4) ?
    C16A C4A C5A C7A . . . . 2.7(5) ?
    C3A C4A C5A C7A . . . . -178.4(3) ?
    C16A C4A C5A S1A . . . . -178.7(3) ?
    C3A C4A C5A S1A . . . . 0.1(5) ?
    C6A S1A C5A C4A . . . . -176.0(3) ?
    C6A S1A C5A C7A . . . . 2.6(3) ?
    C5A S1A C6A C8A . . . . -1.5(3) ?
    C18A N1A C7A C5A . . . . 0.5(5) ?
    C18A N1A C7A C8A . . . . -178.5(3) ?
    C4A C5A C7A N1A . . . . -3.5(5) ?
    S1A C5A C7A N1A . . . . 177.7(3) ?
    C4A C5A C7A C8A . . . . 175.6(3) ?
    S1A C5A C7A C8A . . . . -3.2(4) ?
    S1A C6A C8A N3A . . . . -179.4(3) ?
    S1A C6A C8A C7A . . . . -0.1(4) ?
    C9A N3A C8A C6A . . . . -15.4(6) ?
    C9A N3A C8A C7A . . . . 165.4(3) ?
    N1A C7A C8A C6A . . . . -178.7(3) ?
    C5A C7A C8A C6A . . . . 2.2(4) ?
    N1A C7A C8A N3A . . . . 0.7(5) ?
    C5A C7A C8A N3A . . . . -178.4(3) ?
    C8A N3A C9A O1A . . . . 9.6(6) ?
    C8A N3A C9A N5A . . . . -170.4(3) ?
    C10A N5A C9A O1A . . . . 7.1(6) ?
    C10A N5A C9A N3A . . . . -173.0(3) ?
    C9A N5A C10A C15A . . . . 151.5(3) ?
    C9A N5A C10A C11A . . . . -30.3(6) ?
    C15A C10A C11A C12A . . . . -3.0(5) ?
    N5A C10A C11A C12A . . . . 178.8(3) ?
    C10A C11A C12A C13A . . . . 1.3(6) ?
    C11A C12A C13A C14A . . . . 1.8(6) ?
    C11A C12A C13A F1A . . . . -177.7(3) ?
    C12A C13A C14A C15A . . . . -3.0(6) ?
    F1A C13A C14A C15A . . . . 176.5(3) ?
    C11A C10A C15A C14A . . . . 1.9(5) ?
    N5A C10A C15A C14A . . . . -179.9(3) ?
    C13A C14A C15A C10A . . . . 1.1(5) ?
    C5A C4A C16A C18A . . . . 0.5(5) ?
    C3A C4A C16A C18A . . . . -178.4(3) ?
    C5A C4A C16A S2A . . . . 179.4(3) ?
    C3A C4A C16A S2A . . . . 0.5(5) ?
    C17A S2A C16A C4A . . . . -177.0(3) ?
    C17A S2A C16A C18A . . . . 2.0(3) ?
    C16A S2A C17A C19A . . . . -0.8(3) ?
    C7A N1A C18A C16A . . . . 2.9(5) ?
    C7A N1A C18A C19A . . . . -177.0(3) ?
    C4A C16A C18A N1A . . . . -3.6(5) ?
    S2A C16A C18A N1A . . . . 177.4(3) ?
    C4A C16A C18A C19A . . . . 176.3(3) ?
    S2A C16A C18A C19A . . . . -2.8(4) ?
    S2A C17A C19A N2A . . . . 177.4(3) ?
    S2A C17A C19A C18A . . . . -0.6(4) ?
    C20A N2A C19A C17A . . . . -20.7(6) ?
    C20A N2A C19A C18A . . . . 157.2(3) ?
    N1A C18A C19A C17A . . . . -177.9(3) ?
    C16A C18A C19A C17A . . . . 2.2(4) ?
    N1A C18A C19A N2A . . . . 3.8(5) ?
    C16A C18A C19A N2A . . . . -176.1(3) ?
    C21A N4A C20A O2A . . . . -10.3(6) ?
    C21A N4A C20A N2A . . . . 171.3(3) ?
    C19A N2A C20A O2A . . . . 17.3(5) ?
    C19A N2A C20A N4A . . . . -164.2(3) ?
    C20A N4A C21A C26A . . . . 160.3(3) ?
    C20A N4A C21A C22A . . . . -20.9(5) ?
    C26A C21A C22A C23A . . . . -0.1(5) ?
    N4A C21A C22A C23A . . . . -178.9(3) ?
    C21A C22A C23A C24A . . . . 0.4(6) ?
    C22A C23A C24A F2A . . . . -179.6(3) ?
    C22A C23A C24A C25A . . . . -0.2(6) ?
    F2A C24A C25A C26A . . . . 179.1(3) ?
    C23A C24A C25A C26A . . . . -0.3(5) ?
    C22A C21A C26A C25A . . . . -0.4(5) ?
    N4A C21A C26A C25A . . . . 178.4(3) ?
    C24A C25A C26A C21A . . . . 0.6(5) ?
    C39A N6A C27A C28A . . . . -65.7(4) ?
    C31A N6A C27A C28A . . . . 52.5(4) ?
    C35A N6A C27A C28A . . . . 173.3(3) ?
    N6A C27A C28A C29A . . . . -175.0(3) ?
    C27A C28A C29A C30A . . . . 175.9(4) ?
    C39A N6A C31A C32A . . . . 174.1(3) ?
    C27A N6A C31A C32A . . . . 52.8(4) ?
    C35A N6A C31A C32A . . . . -65.0(4) ?
    N6A C31A C32A C33A . . . . -174.6(3) ?
    C31A C32A C33A C34A . . . . 174.8(4) ?
    C39A N6A C35A C36A . . . . 57.3(4) ?
    C27A N6A C35A C36A . . . . 178.4(3) ?
    C31A N6A C35A C36A . . . . -60.7(4) ?
    N6A C35A C36A C37A . . . . -170.3(3) ?
    C35A C36A C37A C38A . . . . -172.7(3) ?
    C27A N6A C39A C40A . . . . -65.9(4) ?
    C31A N6A C39A C40A . . . . 172.9(3) ?
    C35A N6A C39A C40A . . . . 52.0(4) ?
    N6A C39A C40A C41A . . . . 177.2(3) ?
    C39A C40A C41A C42A . . . . -76.1(5) ?
    C1B C2B C3B C4B . . . . 178.2(4) ?
    C2B C3B C4B C5B . . . . 84.9(6) ?
    C2B C3B C4B C16B . . . . -94.4(6) ?
    C16B C4B C5B C7B . . . . -2.0(8) ?
    C3B C4B C5B C7B . . . . 178.6(4) ?
    C16B C4B C5B S1B . . . . 176.9(4) ?
    C3B C4B C5B S1B . . . . -2.5(8) ?
    C6B S1B C5B C4B . . . . 177.4(6) ?
    C6B S1B C5B C7B . . . . -3.6(5) ?
    C5B S1B C6B C8B . . . . 0.6(6) ?
    C18B N1B C7B C5B . . . . 4.5(6) ?
    C18B N1B C7B C8B . . . . 178.6(3) ?
    C4B C5B C7B N1B . . . . -0.6(7) ?
    S1B C5B C7B N1B . . . . -179.7(3) ?
    C4B C5B C7B C8B . . . . -175.1(4) ?
    S1B C5B C7B C8B . . . . 5.8(5) ?
    S1B C6B C8B N3B . . . . -173.0(3) ?
    S1B C6B C8B C7B . . . . 2.6(7) ?
    N1B C7B C8B C6B . . . . 179.8(5) ?
    C5B C7B C8B C6B . . . . -5.5(6) ?
    N1B C7B C8B N3B . . . . -3.8(5) ?
    C5B C7B C8B N3B . . . . 170.9(4) ?
    C5B C4B C16B C18B . . . . 0.6(8) ?
    C3B C4B C16B C18B . . . . -180.0(5) ?
    C5B C4B C16B S2B . . . . -177.2(5) ?
    C3B C4B C16B S2B . . . . 2.2(9) ?
    C17B S2B C16B C4B . . . . 178.5(6) ?
    C17B S2B C16B C18B . . . . 0.5(4) ?
    C16B S2B C17B C19B . . . . 1.4(4) ?
    C7B N1B C18B C16B . . . . -6.1(6) ?
    C7B N1B C18B C19B . . . . 178.3(3) ?
    C4B C16B C18B N1B . . . . 3.8(8) ?
    S2B C16B C18B N1B . . . . -178.1(3) ?
    C4B C16B C18B C19B . . . . 179.7(5) ?
    S2B C16B C18B C19B . . . . -2.1(5) ?
    S2B C17B C19B N2B . . . . 177.4(3) ?
    S2B C17B C19B C18B . . . . -2.8(4) ?
    N1B C18B C19B C17B . . . . 179.3(3) ?
    C16B C18B C19B C17B . . . . 3.2(5) ?
    N1B C18B C19B N2B . . . . -0.9(5) ?
    C16B C18B C19B N2B . . . . -177.0(4) ?
    C1D C2D C3D C4D . . . . -178.(2) ?
    C2D C3D C4D C5D . . . . -102.(3) ?
    C2D C3D C4D C16D . . . . 79.(4) ?
    C16D C4D C5D S1D . . . . -180.(2) ?
    C3D C4D C5D S1D . . . . 1.(4) ?
    C6D S1D C5D C4D . . . . 168.(3) ?
    C5D C4D C16D S2D . . . . -176.(2) ?
    C3D C4D C16D S2D . . . . 3.(4) ?
    C17B C19B N2B C20B . . . . 3.6(6) ?
    C18B C19B N2B C20B . . . . -176.2(3) ?
    C6B C8B N3B C9B . . . . 25.5(8) ?
    C7B C8B N3B C9B . . . . -150.0(3) ?
    C10B N5B C9B O1B . . . . 7.5(5) ?
    C10B N5B C9B N3B . . . . -172.4(3) ?
    C8B N3B C9B O1B . . . . -22.5(5) ?
    C8B N3B C9B N5B . . . . 157.4(3) ?
    C9B N5B C10B C11B . . . . 19.8(5) ?
    C9B N5B C10B C15B . . . . -161.8(3) ?
    C15B C10B C11B C12B . . . . 0.5(5) ?
    N5B C10B C11B C12B . . . . 178.8(3) ?
    C10B C11B C12B C13B . . . . -0.3(6) ?
    C11B C12B C13B F1B . . . . 178.8(3) ?
    C11B C12B C13B C14B . . . . -0.3(6) ?
    F1B C13B C14B C15B . . . . -178.4(3) ?
    C12B C13B C14B C15B . . . . 0.7(5) ?
    C13B C14B C15B C10B . . . . -0.4(5) ?
    C11B C10B C15B C14B . . . . -0.1(5) ?
    N5B C10B C15B C14B . . . . -178.6(3) ?
    C19B N2B C20B O2B . . . . -2.1(6) ?
    C19B N2B C20B N4B . . . . 177.5(3) ?
    C21B N4B C20B O2B . . . . -10.0(6) ?
    C21B N4B C20B N2B . . . . 170.4(3) ?
    C20B N4B C21B C22B . . . . 28.3(5) ?
    C20B N4B C21B C26B . . . . -152.4(3) ?
    C26B C21B C22B C23B . . . . 2.4(5) ?
    N4B C21B C22B C23B . . . . -178.3(4) ?
    C21B C22B C23B C24B . . . . -1.0(6) ?
    C22B C23B C24B F2B . . . . 178.1(3) ?
    C22B C23B C24B C25B . . . . -1.3(6) ?
    F2B C24B C25B C26B . . . . -177.2(3) ?
    C23B C24B C25B C26B . . . . 2.2(5) ?
    C24B C25B C26B C21B . . . . -0.8(5) ?
    C22B C21B C26B C25B . . . . -1.5(5) ?
    N4B C21B C26B C25B . . . . 179.2(3) ?
    C35B N6B C27B C28B . . . . 178.2(3) ?
    C31B N6B C27B C28B . . . . 56.7(4) ?
    C39B N6B C27B C28B . . . . -60.6(5) ?
    N6B C27B C28B C29B . . . . 175.2(3) ?
    C27B C28B C29B C30B . . . . 173.9(4) ?
    C35B N6B C31B C32B . . . . -55.6(4) ?
    C27B N6B C31B C32B . . . . 62.6(4) ?
    C39B N6B C31B C32B . . . . -176.4(4) ?
    N6B C31B C32B C33B . . . . 176.4(3) ?
    C31B C32B C33B C34B . . . . -175.7(3) ?
    C31B N6B C35B C36B . . . . -51.5(4) ?
    C27B N6B C35B C36B . . . . -172.3(3) ?
    C39B N6B C35B C36B . . . . 66.1(4) ?
    N6B C35B C36B C37B . . . . 178.2(3) ?
    C35B C36B C37B C38B . . . . -169.6(4) ?
    C35B N6B C39B C40B . . . . 76.5(8) ?
    C31B N6B C39B C40B . . . . -162.3(7) ?
    C27B N6B C39B C40B . . . . -42.0(8) ?
    N6B C39B C40B C41B . . . . -155.7(6) ?
    C39B C40B C41B C42B . . . . -94.9(8) ?

loop_
    _geom_hbond_atom_site_label_D
    _geom_hbond_atom_site_label_H
    _geom_hbond_atom_site_label_A
    _geom_hbond_site_symmetry_A
    _geom_hbond_distance_DH
    _geom_hbond_distance_HA
    _geom_hbond_distance_DA
    _geom_hbond_angle_DHA
    _geom_hbond_publ_flag
    N2A H2NA Cl1A . 0.83(4) 2.63(4) 3.387(3) 152.(4) ?
    N2A H2NA N1A . 0.83(4) 2.34(4) 2.765(4) 112.(3) ?
    N3A H3NA Cl1A . 0.80(4) 2.71(4) 3.451(3) 154.(4) ?
    N3A H3NA N1A . 0.80(4) 2.33(4) 2.737(4) 112.(3) ?
    N4A H4NA Cl1A . 0.80(4) 2.51(5) 3.288(4) 166.(4) ?
    N5A H5NA Cl1A . 0.77(4) 2.55(4) 3.296(4) 166.(4) ?
    N2B H2NB Cl1B . 0.74(4) 2.73(4) 3.412(3) 154.(4) ?
    N2B H2NB N1B . 0.74(4) 2.37(5) 2.743(4) 113.(4) ?
    N3B H3NB Cl1B . 0.91(4) 2.53(4) 3.389(3) 157.(3) ?
    N4B H4NB Cl1B . 0.83(4) 2.48(4) 3.296(3) 168.(3) ?
    N5B H5NB Cl1B . 0.81(5) 2.49(5) 3.292(3) 169.(4) ?
