# Supplementary material for: Solution and Solid State Studies of Urea Derivatives of DITIPIRAM Acting as Powerful Anion Receptors
Source: Molecules. 2021 Mar 22;26(6):1788. doi: 10.3390/molecules26061788 (PMC8004752; doi:10.3390/molecules26061788)
Supplement: Supplementary file 1 [file molecules-26-01788-s001.zip › 6_(DMSO_H2O).cif]

data_5B
_chemical_name_systematic               ?
_chemical_name_common                   ?
_chemical_formula_moiety                ?
_chemical_formula_sum                   'C28 H29 F2 N5 O4 S3'
_chemical_formula_iupac                 ?
_chemical_formula_weight                633.74

_chemical_melting_point                 ?

_space_group_crystal_system             monoclinic
_space_group_name_H-M_alt               'P 1 21/n 1'
_space_group_name_Hall                  '-P 2yn'
loop_
    _space_group_symop_operation_xyz
    'x, y, z'
    '-x+1/2, y+1/2, -z+1/2'
    '-x, -y, -z'
    'x-1/2, -y-1/2, z-1/2'

_cell_length_a                          10.2142(5)
_cell_length_b                          22.3169(11)
_cell_length_c                          12.6528(6)
_cell_angle_alpha                       90
_cell_angle_beta                        90.0136(12)
_cell_angle_gamma                       90
_cell_volume                            2884.2(2)
_cell_formula_units_Z                   4
_cell_measurement_reflns_used           9857
_cell_measurement_theta_min             3.1467
_cell_measurement_theta_max             25.3750
_cell_measurement_temperature           100.(2)

_exptl_crystal_description              prism
_exptl_crystal_colour                   'pale yellow'
_exptl_crystal_size_max                 0.559
_exptl_crystal_size_mid                 0.273
_exptl_crystal_size_min                 0.104
_exptl_crystal_density_diffrn           1.459
_exptl_crystal_density_meas             ?
_exptl_crystal_density_method           'not measured'
_exptl_crystal_F_000                    1320

_exptl_absorpt_coefficient_mu           0.314
_exptl_absorpt_correction_type          multi-scan
_exptl_absorpt_process_details          'SADABS V2012/1 (Bruker AXS Inc.)'
_exptl_absorpt_correction_T_min         0.89
_exptl_absorpt_correction_T_max         0.97

_exptl_special_details                  
;
; 

_diffrn_ambient_temperature             100.(2)

_diffrn_source                          'fine focus sealed tube'
_diffrn_source_type                     ?

_diffrn_radiation_type                  MoK\a
_diffrn_radiation_wavelength            0.71073
_diffrn_radiation_monochromator         TRIUMPH

_diffrn_measurement_device_type         'Bruker D8 VENTURE'
_diffrn_measurement_method              'omega scans'

_diffrn_detector_area_resol_mean        10.4167

_diffrn_reflns_number                   38247
_diffrn_reflns_av_R_equivalents         0.0254
_diffrn_reflns_av_unetI/netI            0.0140
_diffrn_reflns_theta_min                3.15
_diffrn_reflns_theta_max                25.05
_diffrn_reflns_theta_full               25.05
_diffrn_measured_fraction_theta_max     0.998
_diffrn_measured_fraction_theta_full    0.998
_diffrn_reflns_limit_h_min              -12
_diffrn_reflns_limit_h_max              12
_diffrn_reflns_limit_k_min              -26
_diffrn_reflns_limit_k_max              26
_diffrn_reflns_limit_l_min              -15
_diffrn_reflns_limit_l_max              15

_refine_special_details                 
;
;

_reflns_number_total                    5095
_reflns_number_gt                       4639
_reflns_threshold_expression            'I > 2\s(I)'

_refine_ls_structure_factor_coef        Fsqd
_refine_ls_matrix_type                  full
_refine_ls_R_factor_all                 0.0360
_refine_ls_R_factor_gt                  0.0319
_refine_ls_wR_factor_gt                 0.0829
_refine_ls_wR_factor_ref                0.0861
_refine_ls_goodness_of_fit_ref          1.040
_refine_ls_restrained_S_all             1.040
_refine_ls_number_reflns                5095
_refine_ls_number_parameters            407
_refine_ls_number_restraints            0
_refine_ls_hydrogen_treatment           mixed
_refine_ls_weighting_scheme             calc
_refine_ls_weighting_details            
    'w=1/[\s^2^(Fo^2^)+(0.0421P)^2^+2.5003P] where P=(Fo^2^+2Fc^2^)/3'

_atom_sites_solution_hydrogens          mixed
_atom_sites_solution_primary            ?
_atom_sites_solution_secondary          ?

_refine_ls_shift/su_max                 0.001
_refine_ls_shift/su_mean                0.000
_refine_diff_density_max                0.731
_refine_diff_density_min                -0.452
_refine_ls_extinction_method            SHELXL
_refine_ls_extinction_coef              0.0008(3)

loop_
    _atom_type_symbol
    _atom_type_description
    _atom_type_scat_dispersion_real
    _atom_type_scat_dispersion_imag
    _atom_type_scat_source
    C C 0.0033 0.0016 'International Tables Vol C Tables 4.2.6.8 and 6.1.1.4'
    H H 0.0000 0.0000 'International Tables Vol C Tables 4.2.6.8 and 6.1.1.4'
    N N 0.0061 0.0033 'International Tables Vol C Tables 4.2.6.8 and 6.1.1.4'
    O O 0.0106 0.0060 'International Tables Vol C Tables 4.2.6.8 and 6.1.1.4'
    F F 0.0171 0.0103 'International Tables Vol C Tables 4.2.6.8 and 6.1.1.4'
    S S 0.1246 0.1234 'International Tables Vol C Tables 4.2.6.8 and 6.1.1.4'

_computing_data_collection              'APEX2 V2013 (Bruker AXS Inc., 2013)'
_computing_cell_refinement              'SAINT V8.34A (Bruker AXS Inc., 2013)'
_computing_data_reduction               'SAINT V8.34A (Bruker AXS Inc., 2013)'
_computing_structure_solution           'SHELXS-97 (Sheldrick, 2008)'
_computing_structure_refinement         'SHELXL-2013 (Sheldrick, 2013)'
_computing_molecular_graphics           ?
_computing_publication_material         'APEX2 V2013 (Bruker AXS Inc., 2013)'

loop_
    _atom_site_type_symbol
    _atom_site_label
    _atom_site_fract_x
    _atom_site_fract_y
    _atom_site_fract_z
    _atom_site_U_iso_or_equiv
    _atom_site_adp_type
    _atom_site_calc_flag
    _atom_site_refinement_flags_adp
    _atom_site_refinement_flags_occupancy
    _atom_site_refinement_flags_posn
    _atom_site_occupancy
    _atom_site_disorder_assembly
    _atom_site_disorder_group
    S S1 0.74498(4) 0.24222(2) 0.05812(3) 0.01923(12) Uani d . . . 1 . .
    S S2 0.79260(5) -0.00760(2) 0.07145(3) 0.02040(12) Uani d . . . 1 . .
    F F1 1.00249(12) 0.45076(6) 0.82283(10) 0.0383(3) Uani d . . . 1 . .
    F F2 0.89441(11) -0.19354(5) 0.87219(8) 0.0276(3) Uani d . . . 1 . .
    O O1 0.83678(13) 0.34039(5) 0.36477(10) 0.0238(3) Uani d . . . 1 . .
    O O2 0.88147(12) -0.08755(5) 0.39624(9) 0.0188(3) Uani d . . . 1 . .
    N N1 0.80499(13) 0.12235(6) 0.27666(11) 0.0135(3) Uani d . . . 1 . .
    N N2 0.82176(14) 0.01011(7) 0.38172(11) 0.0156(3) Uani d . . . 1 . .
    H H2N 0.804(2) 0.0413(10) 0.4113(17) 0.022(5) Uiso d . . . 1 . .
    N N3 0.81362(15) 0.23876(7) 0.36575(12) 0.0177(3) Uani d . . . 1 . .
    H H3N 0.830(2) 0.2082(10) 0.3969(17) 0.020(5) Uiso d . . . 1 . .
    N N4 0.83865(14) -0.03203(7) 0.54493(12) 0.0165(3) Uani d . . . 1 . .
    H H4N 0.809(2) -0.0002(10) 0.5620(17) 0.023(6) Uiso d . . . 1 . .
    N N5 0.89284(14) 0.28564(7) 0.51143(12) 0.0186(3) Uani d . . . 1 . .
    H H5N 0.897(2) 0.2506(10) 0.5330(16) 0.020(5) Uiso d . . . 1 . .
    C C1 0.9629(2) 0.16425(10) -0.12458(16) 0.0306(5) Uani d . . . 1 . .
    H H1A 0.9118 0.1994 -0.146 0.046 Uiso calc U . R 1 . .
    H H1B 1.0385 0.1598 -0.1716 0.046 Uiso calc U . R 1 . .
    H H1C 0.9933 0.1695 -0.0517 0.046 Uiso calc U . R 1 . .
    C C2 0.87760(19) 0.10866(9) -0.13150(14) 0.0242(4) Uani d . . . 1 . .
    H H2A 0.9283 0.0738 -0.1057 0.029 Uiso calc U . R 1 . .
    H H2B 0.8555 0.1012 -0.2065 0.029 Uiso calc U . R 1 . .
    C C3 0.75020(18) 0.11334(8) -0.06761(14) 0.0210(4) Uani d . . . 1 . .
    H H3A 0.7016 0.1493 -0.0911 0.025 Uiso calc U . R 1 . .
    H H3B 0.6952 0.0779 -0.0832 0.025 Uiso calc U . R 1 . .
    C C4 0.77098(16) 0.11715(8) 0.04981(14) 0.0165(4) Uani d . . . 1 . .
    C C5 0.77076(16) 0.17034(8) 0.10615(14) 0.0162(4) Uani d . . . 1 . .
    C C6 0.76144(17) 0.27292(8) 0.18387(14) 0.0186(4) Uani d . . . 1 . .
    H H6 0.7527 0.3145 0.1984 0.022 Uiso calc U . R 1 . .
    C C7 0.78994(15) 0.17119(7) 0.21689(13) 0.0144(3) Uani d . . . 1 . .
    C C8 0.78808(16) 0.23132(7) 0.25883(14) 0.0158(3) Uani d . . . 1 . .
    C C9 0.84714(16) 0.29262(7) 0.41150(14) 0.0166(4) Uani d . . . 1 . .
    C C10 0.92218(16) 0.33022(8) 0.58590(14) 0.0180(4) Uani d . . . 1 . .
    C C11 0.92918(17) 0.39106(8) 0.56283(16) 0.0216(4) Uani d . . . 1 . .
    H H11 0.9153 0.4048 0.4927 0.026 Uiso calc U . R 1 . .
    C C12 0.95675(18) 0.43160(9) 0.64336(16) 0.0263(4) Uani d . . . 1 . .
    H H12 0.9614 0.4733 0.6289 0.032 Uiso calc U . R 1 . .
    C C13 0.97715(18) 0.41061(9) 0.74378(16) 0.0261(4) Uani d . . . 1 . .
    C C14 0.97372(18) 0.35084(9) 0.76850(16) 0.0256(4) Uani d . . . 1 . .
    H H14 0.9899 0.3375 0.8386 0.031 Uiso calc U . R 1 . .
    C C15 0.94609(17) 0.31049(8) 0.68868(15) 0.0220(4) Uani d . . . 1 . .
    H H15 0.9434 0.2688 0.704 0.026 Uiso calc U . R 1 . .
    C C16 0.79026(16) 0.06666(8) 0.11212(13) 0.0161(4) Uani d . . . 1 . .
    C C17 0.80929(17) -0.03267(8) 0.20101(14) 0.0186(4) Uani d . . . 1 . .
    H H17 0.8146 -0.0738 0.2199 0.022 Uiso calc U . R 1 . .
    C C18 0.80388(15) 0.07091(7) 0.22304(13) 0.0140(3) Uani d . . . 1 . .
    C C19 0.81382(16) 0.01267(7) 0.27181(13) 0.0149(3) Uani d . . . 1 . .
    C C20 0.84998(15) -0.04012(7) 0.43900(13) 0.0143(3) Uani d . . . 1 . .
    C C21 0.85526(15) -0.07523(8) 0.62531(13) 0.0150(3) Uani d . . . 1 . .
    C C22 0.85563(16) -0.13670(8) 0.60672(14) 0.0180(4) Uani d . . . 1 . .
    H H22 0.8463 -0.1515 0.5367 0.022 Uiso calc U . R 1 . .
    C C23 0.86957(17) -0.17636(8) 0.69000(14) 0.0197(4) Uani d . . . 1 . .
    H H23 0.8707 -0.2184 0.6776 0.024 Uiso calc U . R 1 . .
    C C24 0.88175(17) -0.15426(8) 0.79050(14) 0.0197(4) Uani d . . . 1 . .
    C C25 0.88068(17) -0.09397(8) 0.81191(14) 0.0199(4) Uani d . . . 1 . .
    H H25 0.8886 -0.0797 0.8824 0.024 Uiso calc U . R 1 . .
    C C26 0.86772(17) -0.05439(8) 0.72827(14) 0.0186(4) Uani d . . . 1 . .
    H H26 0.8673 -0.0125 0.7415 0.022 Uiso calc U . R 1 . .
    O O1S 0.90179(16) 0.16276(6) 0.56664(12) 0.0286(3) Uani d . . . 1 . .
    H H1OS 0.846(3) 0.1379(12) 0.569(2) 0.043(8) Uiso d . . . 1 . .
    H H2OS 0.968(3) 0.1433(12) 0.577(2) 0.042(7) Uiso d . . . 1 . .
    S S1T 0.60067(4) 0.09027(2) 0.66288(4) 0.02138(12) Uani d . . . 1 . .
    O O1T 0.70752(12) 0.07821(6) 0.58257(11) 0.0261(3) Uani d . . . 1 . .
    C C1T 0.5975(2) 0.16955(9) 0.67797(18) 0.0302(5) Uani d . . . 1 . .
    H H1T1 0.68 0.183 0.7096 0.045 Uiso calc U . R 1 . .
    H H1T2 0.5244 0.1809 0.724 0.045 Uiso calc U . R 1 . .
    H H1T3 0.5865 0.1884 0.6086 0.045 Uiso calc U . R 1 . .
    C C2T 0.45076(19) 0.08223(9) 0.59291(17) 0.0289(4) Uani d . . . 1 . .
    H H2T1 0.4523 0.1077 0.5298 0.043 Uiso calc U . R 1 . .
    H H2T2 0.3779 0.0943 0.6386 0.043 Uiso calc U . R 1 . .
    H H2T3 0.4395 0.0403 0.5718 0.043 Uiso calc U . R 1 . .

loop_
    _atom_site_aniso_label
    _atom_site_aniso_U_11
    _atom_site_aniso_U_22
    _atom_site_aniso_U_33
    _atom_site_aniso_U_12
    _atom_site_aniso_U_13
    _atom_site_aniso_U_23
    S1 0.0237(2) 0.0159(2) 0.0182(2) 0.00099(17) -0.00222(17) 0.00536(17)
    S2 0.0299(2) 0.0155(2) 0.0159(2) -0.00013(18) -0.00104(17) -0.00325(17)
    F1 0.0406(7) 0.0352(7) 0.0390(7) -0.0037(5) -0.0031(5) -0.0225(6)
    F2 0.0342(6) 0.0270(6) 0.0216(6) 0.0003(5) -0.0015(5) 0.0109(5)
    O1 0.0336(7) 0.0125(6) 0.0252(7) -0.0002(5) -0.0048(6) 0.0014(5)
    O2 0.0250(7) 0.0135(6) 0.0179(6) 0.0053(5) 0.0005(5) -0.0006(5)
    N1 0.0127(7) 0.0118(7) 0.0160(7) 0.0000(5) -0.0004(5) 0.0010(6)
    N2 0.0215(7) 0.0096(7) 0.0156(7) 0.0021(6) 0.0001(6) -0.0023(6)
    N3 0.0250(8) 0.0099(7) 0.0184(8) 0.0010(6) -0.0015(6) 0.0025(6)
    N4 0.0231(8) 0.0093(7) 0.0170(8) 0.0033(6) 0.0007(6) -0.0008(6)
    N5 0.0235(8) 0.0107(8) 0.0216(8) 0.0013(6) -0.0031(6) -0.0003(6)
    C1 0.0323(11) 0.0351(11) 0.0245(10) -0.0014(9) 0.0078(8) 0.0026(9)
    C2 0.0297(10) 0.0272(10) 0.0156(9) 0.0038(8) 0.0004(7) 0.0003(8)
    C3 0.0250(9) 0.0235(10) 0.0146(9) -0.0003(7) -0.0036(7) 0.0012(7)
    C4 0.0137(8) 0.0186(9) 0.0171(9) -0.0008(7) -0.0010(6) 0.0021(7)
    C5 0.0143(8) 0.0164(9) 0.0179(9) -0.0003(7) -0.0012(6) 0.0039(7)
    C6 0.0205(9) 0.0135(8) 0.0217(9) 0.0007(7) 0.0001(7) 0.0016(7)
    C7 0.0112(8) 0.0143(8) 0.0176(8) -0.0004(6) 0.0002(6) 0.0014(7)
    C8 0.0151(8) 0.0135(8) 0.0187(9) -0.0005(7) 0.0008(6) 0.0006(7)
    C9 0.0149(8) 0.0131(8) 0.0219(9) 0.0011(6) 0.0022(7) -0.0006(7)
    C10 0.0123(8) 0.0176(9) 0.0241(9) 0.0015(7) 0.0010(7) -0.0048(7)
    C11 0.0177(9) 0.0177(9) 0.0295(10) 0.0009(7) -0.0004(7) -0.0027(8)
    C12 0.0214(9) 0.0175(9) 0.0400(12) -0.0009(7) 0.0009(8) -0.0085(8)
    C13 0.0187(9) 0.0282(11) 0.0315(11) -0.0019(8) 0.0000(8) -0.0156(9)
    C14 0.0205(9) 0.0330(11) 0.0234(10) -0.0003(8) 0.0008(7) -0.0061(8)
    C15 0.0198(9) 0.0212(9) 0.0250(10) 0.0002(7) 0.0009(7) -0.0026(8)
    C16 0.0155(8) 0.0161(9) 0.0166(9) -0.0008(7) -0.0003(6) -0.0020(7)
    C17 0.0237(9) 0.0133(8) 0.0188(9) 0.0001(7) 0.0001(7) 0.0007(7)
    C18 0.0115(8) 0.0135(8) 0.0171(9) 0.0003(6) -0.0001(6) 0.0000(7)
    C19 0.0141(8) 0.0142(8) 0.0164(8) -0.0004(6) 0.0000(6) 0.0011(7)
    C20 0.0120(8) 0.0124(8) 0.0186(9) -0.0010(6) -0.0005(6) 0.0006(7)
    C21 0.0122(8) 0.0153(8) 0.0175(9) 0.0000(6) 0.0004(6) 0.0020(7)
    C22 0.0198(9) 0.0164(9) 0.0178(9) -0.0030(7) 0.0003(7) -0.0008(7)
    C23 0.0212(9) 0.0140(8) 0.0239(10) -0.0031(7) 0.0012(7) 0.0022(7)
    C24 0.0169(8) 0.0224(9) 0.0198(9) -0.0012(7) 0.0005(7) 0.0079(7)
    C25 0.0174(9) 0.0268(10) 0.0154(9) 0.0008(7) 0.0012(7) -0.0011(7)
    C26 0.0193(9) 0.0160(9) 0.0207(9) 0.0012(7) 0.0011(7) -0.0023(7)
    O1S 0.0203(7) 0.0171(7) 0.0482(9) 0.0017(6) 0.0044(6) 0.0083(6)
    S1T 0.0203(2) 0.0200(2) 0.0239(2) 0.00069(17) -0.00106(18) 0.00041(18)
    O1T 0.0212(7) 0.0169(6) 0.0401(8) 0.0011(5) 0.0061(6) -0.0070(6)
    C1T 0.0266(10) 0.0231(10) 0.0410(12) 0.0030(8) 0.0020(9) -0.0121(9)
    C2T 0.0202(9) 0.0246(10) 0.0418(12) -0.0015(8) -0.0058(8) 0.0008(9)

_geom_special_details                   
;
All esds (except the esd in the dihedral angle between two l.s. planes)
are estimated using the full covariance matrix.  The cell esds are taken
into account individually in the estimation of esds in distances, angles
and torsion angles; correlations between esds in cell parameters are only
used when they are defined by crystal symmetry.  An approximate (isotropic)
treatment of cell esds is used for estimating esds involving l.s. planes.
;

loop_
    _geom_bond_atom_site_label_1
    _geom_bond_atom_site_label_2
    _geom_bond_site_symmetry_2
    _geom_bond_distance
    _geom_bond_publ_flag
    S1 C5 . 1.7355(17) ?
    S1 C6 . 1.7404(18) ?
    S2 C16 . 1.7355(17) ?
    S2 C17 . 1.7405(18) ?
    F1 C13 . 1.367(2) ?
    F2 C24 . 1.362(2) ?
    O1 C9 . 1.224(2) ?
    O2 C20 . 1.231(2) ?
    N1 C18 . 1.334(2) ?
    N1 C7 . 1.335(2) ?
    N2 C20 . 1.366(2) ?
    N2 C19 . 1.394(2) ?
    N2 H2N . 0.81(2) ?
    N3 C9 . 1.377(2) ?
    N3 C8 . 1.388(2) ?
    N3 H3N . 0.81(2) ?
    N4 C20 . 1.358(2) ?
    N4 C21 . 1.412(2) ?
    N4 H4N . 0.80(2) ?
    N5 C9 . 1.357(2) ?
    N5 C10 . 1.403(2) ?
    N5 H5N . 0.83(2) ?
    C1 C2 . 1.518(3) ?
    C1 H1A . 0.98 ?
    C1 H1B . 0.98 ?
    C1 H1C . 0.98 ?
    C2 C3 . 1.536(3) ?
    C2 H2A . 0.99 ?
    C2 H2B . 0.99 ?
    C3 C4 . 1.503(2) ?
    C3 H3A . 0.99 ?
    C3 H3B . 0.99 ?
    C4 C5 . 1.385(2) ?
    C4 C16 . 1.389(2) ?
    C5 C7 . 1.415(2) ?
    C6 C8 . 1.355(2) ?
    C6 H6 . 0.95 ?
    C7 C8 . 1.443(2) ?
    C10 C11 . 1.391(3) ?
    C10 C15 . 1.394(3) ?
    C11 C12 . 1.391(3) ?
    C11 H11 . 0.95 ?
    C12 C13 . 1.370(3) ?
    C12 H12 . 0.95 ?
    C13 C14 . 1.371(3) ?
    C14 C15 . 1.382(3) ?
    C14 H14 . 0.95 ?
    C15 H15 . 0.95 ?
    C16 C18 . 1.414(2) ?
    C17 C19 . 1.352(2) ?
    C17 H17 . 0.95 ?
    C18 C19 . 1.442(2) ?
    C21 C26 . 1.389(2) ?
    C21 C22 . 1.392(2) ?
    C22 C23 . 1.383(3) ?
    C22 H22 . 0.95 ?
    C23 C24 . 1.370(3) ?
    C23 H23 . 0.95 ?
    C24 C25 . 1.373(3) ?
    C25 C26 . 1.385(3) ?
    C25 H25 . 0.95 ?
    C26 H26 . 0.95 ?
    O1S H1OS . 0.80(3) ?
    O1S H2OS . 0.81(3) ?
    S1T O1T . 1.5155(13) ?
    S1T C2T . 1.7777(19) ?
    S1T C1T . 1.780(2) ?
    C1T H1T1 . 0.98 ?
    C1T H1T2 . 0.98 ?
    C1T H1T3 . 0.98 ?
    C2T H2T1 . 0.98 ?
    C2T H2T2 . 0.98 ?
    C2T H2T3 . 0.98 ?

loop_
    _geom_angle_atom_site_label_1
    _geom_angle_atom_site_label_2
    _geom_angle_atom_site_label_3
    _geom_angle_site_symmetry_1
    _geom_angle_site_symmetry_3
    _geom_angle
    _geom_angle_publ_flag
    C5 S1 C6 . . 91.67(8) ?
    C16 S2 C17 . . 91.66(8) ?
    C18 N1 C7 . . 114.42(14) ?
    C20 N2 C19 . . 125.12(15) ?
    C20 N2 H2N . . 120.4(15) ?
    C19 N2 H2N . . 114.5(15) ?
    C9 N3 C8 . . 124.11(15) ?
    C9 N3 H3N . . 118.7(15) ?
    C8 N3 H3N . . 114.5(15) ?
    C20 N4 C21 . . 127.60(15) ?
    C20 N4 H4N . . 114.6(15) ?
    C21 N4 H4N . . 117.1(15) ?
    C9 N5 C10 . . 128.18(16) ?
    C9 N5 H5N . . 115.6(15) ?
    C10 N5 H5N . . 115.9(15) ?
    C2 C1 H1A . . 109.5 ?
    C2 C1 H1B . . 109.5 ?
    H1A C1 H1B . . 109.5 ?
    C2 C1 H1C . . 109.5 ?
    H1A C1 H1C . . 109.5 ?
    H1B C1 H1C . . 109.5 ?
    C1 C2 C3 . . 113.58(16) ?
    C1 C2 H2A . . 108.8 ?
    C3 C2 H2A . . 108.8 ?
    C1 C2 H2B . . 108.8 ?
    C3 C2 H2B . . 108.8 ?
    H2A C2 H2B . . 107.7 ?
    C4 C3 C2 . . 113.88(15) ?
    C4 C3 H3A . . 108.8 ?
    C2 C3 H3A . . 108.8 ?
    C4 C3 H3B . . 108.8 ?
    C2 C3 H3B . . 108.8 ?
    H3A C3 H3B . . 107.7 ?
    C5 C4 C16 . . 113.79(15) ?
    C5 C4 C3 . . 123.85(15) ?
    C16 C4 C3 . . 122.35(16) ?
    C4 C5 C7 . . 121.40(15) ?
    C4 C5 S1 . . 127.76(13) ?
    C7 C5 S1 . . 110.82(13) ?
    C8 C6 S1 . . 112.93(13) ?
    C8 C6 H6 . . 123.5 ?
    S1 C6 H6 . . 123.5 ?
    N1 C7 C5 . . 124.46(15) ?
    N1 C7 C8 . . 123.52(15) ?
    C5 C7 C8 . . 112.01(15) ?
    C6 C8 N3 . . 129.66(16) ?
    C6 C8 C7 . . 112.49(16) ?
    N3 C8 C7 . . 117.86(15) ?
    O1 C9 N5 . . 125.45(16) ?
    O1 C9 N3 . . 122.40(16) ?
    N5 C9 N3 . . 112.14(15) ?
    C11 C10 C15 . . 119.67(17) ?
    C11 C10 N5 . . 124.22(17) ?
    C15 C10 N5 . . 116.11(16) ?
    C10 C11 C12 . . 119.44(18) ?
    C10 C11 H11 . . 120.3 ?
    C12 C11 H11 . . 120.3 ?
    C13 C12 C11 . . 119.19(18) ?
    C13 C12 H12 . . 120.4 ?
    C11 C12 H12 . . 120.4 ?
    F1 C13 C12 . . 118.89(18) ?
    F1 C13 C14 . . 118.40(18) ?
    C12 C13 C14 . . 122.71(18) ?
    C13 C14 C15 . . 118.20(19) ?
    C13 C14 H14 . . 120.9 ?
    C15 C14 H14 . . 120.9 ?
    C14 C15 C10 . . 120.77(18) ?
    C14 C15 H15 . . 119.6 ?
    C10 C15 H15 . . 119.6 ?
    C4 C16 C18 . . 121.52(16) ?
    C4 C16 S2 . . 127.46(13) ?
    C18 C16 S2 . . 110.93(13) ?
    C19 C17 S2 . . 112.76(13) ?
    C19 C17 H17 . . 123.6 ?
    S2 C17 H17 . . 123.6 ?
    N1 C18 C16 . . 124.32(15) ?
    N1 C18 C19 . . 123.89(15) ?
    C16 C18 C19 . . 111.78(15) ?
    C17 C19 N2 . . 129.21(16) ?
    C17 C19 C18 . . 112.86(15) ?
    N2 C19 C18 . . 117.89(15) ?
    O2 C20 N4 . . 124.79(15) ?
    O2 C20 N2 . . 121.83(15) ?
    N4 C20 N2 . . 113.37(15) ?
    C26 C21 C22 . . 119.22(16) ?
    C26 C21 N4 . . 117.26(15) ?
    C22 C21 N4 . . 123.49(16) ?
    C23 C22 C21 . . 120.14(17) ?
    C23 C22 H22 . . 119.9 ?
    C21 C22 H22 . . 119.9 ?
    C24 C23 C22 . . 119.08(17) ?
    C24 C23 H23 . . 120.5 ?
    C22 C23 H23 . . 120.5 ?
    F2 C24 C23 . . 118.78(16) ?
    F2 C24 C25 . . 118.83(16) ?
    C23 C24 C25 . . 122.39(16) ?
    C24 C25 C26 . . 118.37(17) ?
    C24 C25 H25 . . 120.8 ?
    C26 C25 H25 . . 120.8 ?
    C25 C26 C21 . . 120.79(16) ?
    C25 C26 H26 . . 119.6 ?
    C21 C26 H26 . . 119.6 ?
    H1OS O1S H2OS . . 102.(3) ?
    O1T S1T C2T . . 105.58(9) ?
    O1T S1T C1T . . 105.15(9) ?
    C2T S1T C1T . . 97.95(10) ?
    S1T C1T H1T1 . . 109.5 ?
    S1T C1T H1T2 . . 109.5 ?
    H1T1 C1T H1T2 . . 109.5 ?
    S1T C1T H1T3 . . 109.5 ?
    H1T1 C1T H1T3 . . 109.5 ?
    H1T2 C1T H1T3 . . 109.5 ?
    S1T C2T H2T1 . . 109.5 ?
    S1T C2T H2T2 . . 109.5 ?
    H2T1 C2T H2T2 . . 109.5 ?
    S1T C2T H2T3 . . 109.5 ?
    H2T1 C2T H2T3 . . 109.5 ?
    H2T2 C2T H2T3 . . 109.5 ?

loop_
    _geom_torsion_atom_site_label_1
    _geom_torsion_atom_site_label_2
    _geom_torsion_atom_site_label_3
    _geom_torsion_atom_site_label_4
    _geom_torsion_site_symmetry_1
    _geom_torsion_site_symmetry_2
    _geom_torsion_site_symmetry_3
    _geom_torsion_site_symmetry_4
    _geom_torsion
    _geom_torsion_publ_flag
    C1 C2 C3 C4 . . . . -65.6(2) ?
    C2 C3 C4 C5 . . . . 98.0(2) ?
    C2 C3 C4 C16 . . . . -83.1(2) ?
    C16 C4 C5 C7 . . . . 0.5(2) ?
    C3 C4 C5 C7 . . . . 179.55(15) ?
    C16 C4 C5 S1 . . . . -177.88(13) ?
    C3 C4 C5 S1 . . . . 1.1(3) ?
    C6 S1 C5 C4 . . . . 179.16(16) ?
    C6 S1 C5 C7 . . . . 0.62(13) ?
    C5 S1 C6 C8 . . . . 1.32(14) ?
    C18 N1 C7 C5 . . . . 1.6(2) ?
    C18 N1 C7 C8 . . . . 179.93(15) ?
    C4 C5 C7 N1 . . . . -2.4(3) ?
    S1 C5 C7 N1 . . . . 176.22(13) ?
    C4 C5 C7 C8 . . . . 179.06(15) ?
    S1 C5 C7 C8 . . . . -2.29(18) ?
    S1 C6 C8 N3 . . . . 176.61(14) ?
    S1 C6 C8 C7 . . . . -2.86(19) ?
    C9 N3 C8 C6 . . . . -16.3(3) ?
    C9 N3 C8 C7 . . . . 163.18(15) ?
    N1 C7 C8 C6 . . . . -175.19(15) ?
    C5 C7 C8 C6 . . . . 3.3(2) ?
    N1 C7 C8 N3 . . . . 5.3(2) ?
    C5 C7 C8 N3 . . . . -176.21(14) ?
    C10 N5 C9 O1 . . . . 8.4(3) ?
    C10 N5 C9 N3 . . . . -172.22(16) ?
    C8 N3 C9 O1 . . . . 12.1(3) ?
    C8 N3 C9 N5 . . . . -167.27(15) ?
    C9 N5 C10 C11 . . . . -11.1(3) ?
    C9 N5 C10 C15 . . . . 169.28(16) ?
    C15 C10 C11 C12 . . . . -1.6(3) ?
    N5 C10 C11 C12 . . . . 178.82(16) ?
    C10 C11 C12 C13 . . . . 0.4(3) ?
    C11 C12 C13 F1 . . . . -179.14(16) ?
    C11 C12 C13 C14 . . . . 1.1(3) ?
    F1 C13 C14 C15 . . . . 179.02(16) ?
    C12 C13 C14 C15 . . . . -1.2(3) ?
    C13 C14 C15 C10 . . . . -0.1(3) ?
    C11 C10 C15 C14 . . . . 1.5(3) ?
    N5 C10 C15 C14 . . . . -178.89(16) ?
    C5 C4 C16 C18 . . . . 1.9(2) ?
    C3 C4 C16 C18 . . . . -177.17(15) ?
    C5 C4 C16 S2 . . . . 178.22(13) ?
    C3 C4 C16 S2 . . . . -0.8(2) ?
    C17 S2 C16 C4 . . . . -175.92(16) ?
    C17 S2 C16 C18 . . . . 0.75(13) ?
    C16 S2 C17 C19 . . . . -0.40(14) ?
    C7 N1 C18 C16 . . . . 1.0(2) ?
    C7 N1 C18 C19 . . . . -177.71(15) ?
    C4 C16 C18 N1 . . . . -2.8(3) ?
    S2 C16 C18 N1 . . . . -179.73(13) ?
    C4 C16 C18 C19 . . . . 175.99(15) ?
    S2 C16 C18 C19 . . . . -0.92(18) ?
    S2 C17 C19 N2 . . . . 177.43(14) ?
    S2 C17 C19 C18 . . . . -0.06(19) ?
    C20 N2 C19 C17 . . . . 12.4(3) ?
    C20 N2 C19 C18 . . . . -170.24(15) ?
    N1 C18 C19 C17 . . . . 179.46(15) ?
    C16 C18 C19 C17 . . . . 0.6(2) ?
    N1 C18 C19 N2 . . . . 1.7(2) ?
    C16 C18 C19 N2 . . . . -177.16(14) ?
    C21 N4 C20 O2 . . . . -2.4(3) ?
    C21 N4 C20 N2 . . . . 177.07(15) ?
    C19 N2 C20 O2 . . . . 5.9(3) ?
    C19 N2 C20 N4 . . . . -173.68(15) ?
    C20 N4 C21 C26 . . . . 165.99(16) ?
    C20 N4 C21 C22 . . . . -16.0(3) ?
    C26 C21 C22 C23 . . . . -0.6(2) ?
    N4 C21 C22 C23 . . . . -178.56(16) ?
    C21 C22 C23 C24 . . . . 0.6(3) ?
    C22 C23 C24 F2 . . . . 179.50(15) ?
    C22 C23 C24 C25 . . . . 0.0(3) ?
    F2 C24 C25 C26 . . . . -179.98(15) ?
    C23 C24 C25 C26 . . . . -0.5(3) ?
    C24 C25 C26 C21 . . . . 0.4(3) ?
    C22 C21 C26 C25 . . . . 0.1(3) ?
    N4 C21 C26 C25 . . . . 178.19(15) ?

loop_
    _geom_hbond_atom_site_label_D
    _geom_hbond_atom_site_label_H
    _geom_hbond_atom_site_label_A
    _geom_hbond_site_symmetry_A
    _geom_hbond_distance_DH
    _geom_hbond_distance_HA
    _geom_hbond_distance_DA
    _geom_hbond_angle_DHA
    _geom_hbond_publ_flag
    N2 H2N O1T . 0.81(2) 2.52(2) 3.183(2) 139.9(19) ?
    N3 H3N O1S . 0.81(2) 2.48(2) 3.185(2) 146.1(19) ?
    N4 H4N O1T . 0.80(2) 2.05(2) 2.841(2) 169.(2) ?
    N5 H5N O1S . 0.83(2) 2.01(2) 2.831(2) 173.(2) ?
    O1S H1OS S1T . 0.80(3) 2.97(3) 3.6826(16) 151.(2) ?
    O1S H1OS O1T . 0.80(3) 1.95(3) 2.746(2) 177.(3) ?
    O1S H2OS O2 3_756 0.81(3) 2.01(3) 2.8175(19) 174.(3) ?
